# Supplementary material for: Polyoxoplatinates as covalently dynamic electron sponges and molecular electronics materials
Source: Royal Society of Chemistry journal article supplement (doi:10.1039/d1na00387a), 2021-01-01
Supplement: d1na00387a1.pdf [file d1na00387a1.pdf]

# Polyoxoplatinates as Covalently Dynamic Electron Sponges and Molecular Electronics Materials

Aleksandar Kondinski,<sup>a,†\*</sup> Mahdi Ghorbani-Asl<sup>b\*</sup>

a) Department of Chemical Engineering and Biotechnology, University of Cambridge, Philippa Fawcett Dr, Cambridge CB3 0AS, Cambridge, UK

b) Institute of Ion Beam Physics and Materials Research, Helmholtz-Zentrum Dresden-Rossendorf, 01328 Dresden, Germany

\* Correspondance: Email: [aleksandar@kondinski.com](mailto:aleksandar@kondinski.com) and [mahdi.ghorbani@hzdr.de](mailto:mahdi.ghorbani@hzdr.de)

† On the leave from KU Leuven.

## Note on the creation and usage of the term POMtronics:

The term POMtronics has appeared in the literature in multiple instances,<sup>1-3</sup> however it is originally inspired from the term “MOFtronics”, where MOF is an abbreviation of a Metal-Organic Framework. “MOFtronics” was coined by Mark Allendorf and coworkers in 2014,<sup>4</sup> and further popularized by Xinliang Feng and coworkers over the past years.<sup>5</sup> As a hypernym MOFtronics refers to tailoring the electronic structure of MOFs towards the development of MOF-based (opto)electronics, spintronics, battery and supercapacitor devices and other technologies.<sup>4,5</sup>

In similar context, the term POMtronics is a hypernym referring to electronic structure engineering of POMs towards the realization of POM-based technologies in nanoelectronics, opto and photoelectronics, spintronics, battery, capacitor and various energy conversion materials.

## Note on POM Archetypes:

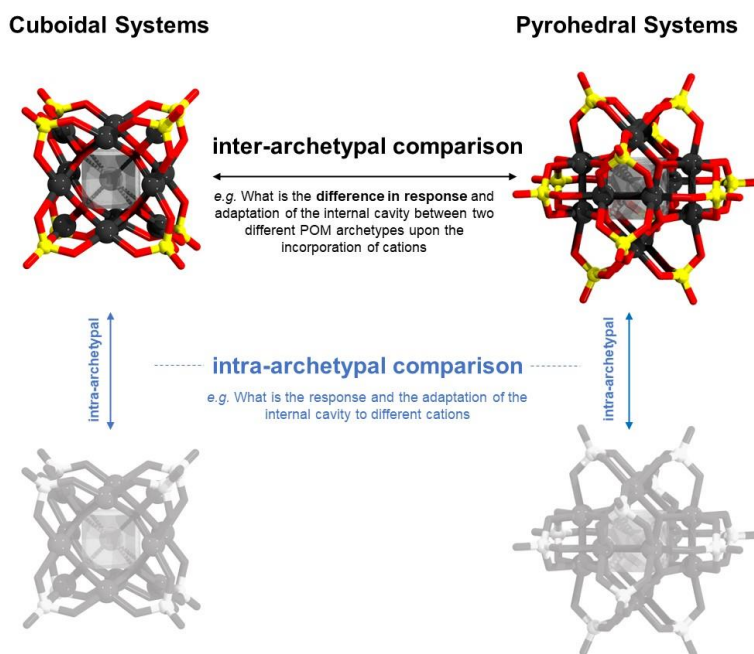

**Scheme S1:** Depiction of the difference between inter-archetypal comparisons and intra-archetypal comparisons. Both the cuboidal and pyrohedal dodecametalates share a number of similar features such as the set of building units (or building unit fragments), design of internal cavities etc. The intra-archetypal comparison offers an insight, for instance, on how the cavity of a particular archetype responds and re-adapts based on the incorporation of different metal cations. On the other hand, the inter-archetypal comparison offers insights into how this response and adaptation differs between different archetypes. Colour code: Pt = black, O = red, S = yellow, M = grey spheres.

**Table S1:** Calculated geometry parameters of  $\{Pt_{12}O_8(XO_4)_{12}\}$  and cation bearing  $\{M-Pt_{12}O_8(XO_4)_{12}\}$  based systems with X = S and P in comparison to crystallographically determined distances in reported structures. Geometry optimization at BP86/TZP/ZORA-scalar/COSMO-water level.

| Structural Type                                                                                      | Bond lengths and interatomic distances [Å] |                  |                    |                    |                  |                  |                  |              |       | $\angle_{in}$ [°] |
|------------------------------------------------------------------------------------------------------|--------------------------------------------|------------------|--------------------|--------------------|------------------|------------------|------------------|--------------|-------|-------------------|
|                                                                                                      | Pt-Pt                                      | Pt- $\mu_3^-(O)$ | Pt-O <sub>ax</sub> | Pt-O <sub>eq</sub> | S-O <sub>t</sub> | S-O <sub>b</sub> | S-O <sub>b</sub> | d(O...O)     | M...O |                   |
| NaPt <sub>3</sub> O <sub>4</sub> (exp) <sup>6</sup>                                                  | 2.844                                      |                  | 2.011              |                    |                  |                  |                  | 2.844        | 2.463 | 90.0              |
| [Pt <sub>12</sub> O <sub>8</sub> (SO <sub>4</sub> ) <sub>12</sub> ] <sup>4-</sup> (exp) <sup>7</sup> | 2.532                                      | 2.000            | 2.14(2.16)         | 2.000              | 1.42(4)          | 1.460-1.482      | 1.521(6)         | 2.883        | -     | 92.3              |
| [Pt <sub>12</sub> O <sub>8</sub> (SO <sub>4</sub> ) <sub>12</sub> ] <sup>4-</sup>                    | <b>2.582</b>                               | <b>2.032</b>     | <b>2.219</b>       | <b>2.071</b>       | <b>1.453</b>     | <b>1.517</b>     | <b>1.553</b>     | <b>3.057</b> | -     | <b>97.6</b>       |
| [Pt <sub>12</sub> O <sub>8</sub> (SO <sub>4</sub> ) <sub>12</sub> ] <sup>10-</sup>                   | 2.627                                      | 2.032            | 2.397              | 2.151              | 1.479            | 1.506            | 1.545            | 3.025        | -     | 99.4              |
| [Pt <sub>12</sub> O <sub>8</sub> (SO <sub>4</sub> ) <sub>12</sub> ] <sup>16-</sup>                   | 2.761                                      | 2.012            | 3.674              | 2.169              | 1.499            | 1.501            | 1.540            | 3.175        | -     | 104.3             |
| [K <sub>8</sub> Pt <sub>12</sub> O <sub>8</sub> (SO <sub>4</sub> ) <sub>12</sub> ] <sup>4+</sup>     | 2.588                                      | 2.036            | 2.217              | 2.068              | 1.444            | 1.525            | 1.557            | 3.076        | -     | 98.2              |
| [K <sub>8</sub> Pt <sub>12</sub> O <sub>8</sub> (SO <sub>4</sub> ) <sub>12</sub> ] <sup>2-</sup>     | 2.632                                      | 2.044            | 2.408              | 2.138              | 1.465            | 1.511            | 1.552            | 3.058        | -     | 96.9              |
| [K <sub>8</sub> Pt <sub>12</sub> O <sub>8</sub> (SO <sub>4</sub> ) <sub>12</sub> ] <sup>8-</sup>     | 2.744                                      | 2.020            | 3.553              | 2.149              | 1.489            | 1.491            | 1.553            | 3.153        | -     | 102.8             |
| [Li <sub>2</sub> Pt <sub>12</sub> O <sub>8</sub> (SO <sub>4</sub> ) <sub>12</sub> ] <sup>3-</sup>    | 2.597                                      | 2.042            | 2.200              | 2.057              | 1.450            | 1.516            | 1.558            | 2.645        | 2.291 | 80.7              |
| [Na <sub>2</sub> Pt <sub>12</sub> O <sub>8</sub> (SO <sub>4</sub> ) <sub>12</sub> ] <sup>3-</sup>    | 2.597                                      | 2.045            | 2.204              | 2.055              | 1.450            | 1.516            | 1.558            | 2.885        | 2.498 | 89.7              |
| [K <sub>2</sub> Pt <sub>12</sub> O <sub>8</sub> (SO <sub>4</sub> ) <sub>12</sub> ] <sup>3-</sup>     | 2.611                                      | 2.059            | 2.204              | 2.058              | 1.450            | 1.517            | 1.557            | 3.068        | 2.657 | 96.3              |
| [Rb <sub>2</sub> Pt <sub>12</sub> O <sub>8</sub> (SO <sub>4</sub> ) <sub>12</sub> ] <sup>3-</sup>    | 2.624                                      | 2.070            | 2.204              | 2.059              | 1.450            | 1.518            | 1.556            | 3.134        | 2.714 | 98.4              |
| [Cs <sub>2</sub> Pt <sub>12</sub> O <sub>8</sub> (SO <sub>4</sub> ) <sub>12</sub> ] <sup>3-</sup>    | 2.645                                      | 2.088            | 2.202              | 2.059              | 1.450            | 1.518            | 1.556            | 3.217        | 2.786 | 100.8             |
| [Be <sub>2</sub> Pt <sub>12</sub> O <sub>8</sub> (SO <sub>4</sub> ) <sub>12</sub> ] <sup>2-</sup>    | 2.586                                      | 2.054            | 2.192              | 2.050              | 1.447            | 1.515            | 1.562            | 2.503        | 2.168 | 75.1              |
| [Mg <sub>2</sub> Pt <sub>12</sub> O <sub>8</sub> (SO <sub>4</sub> ) <sub>12</sub> ] <sup>2-</sup>    | 2.602                                      | 2.060            | 2.192              | 2.048              | 1.447            | 1.516            | 1.561            | 2.602        | 2.253 | 78.3              |
| [Ca <sub>2</sub> Pt <sub>12</sub> O <sub>8</sub> (SO <sub>4</sub> ) <sub>12</sub> ] <sup>2-</sup>    | 2.619                                      | 2.066            | 2.192              | 2.045              | 1.448            | 1.516            | 1.561            | 2.764        | 2.394 | 84.0              |
| [Sr <sub>2</sub> Pt <sub>12</sub> O <sub>8</sub> (SO <sub>4</sub> ) <sub>12</sub> ] <sup>2-</sup>    | 2.626                                      | 2.072            | 2.192              | 2.044              | 1.447            | 1.516            | 1.561            | 2.926        | 2.534 | 89.9              |
| [Ba <sub>2</sub> Pt <sub>12</sub> O <sub>8</sub> (SO <sub>4</sub> ) <sub>12</sub> ] <sup>2-</sup>    | 2.639                                      | 2.084            | 2.193              | 2.047              | 1.448            | 1.517            | 1.560            | 3.095        | 2.680 | 95.9              |
| [La <sub>2</sub> Pt <sub>12</sub> O <sub>8</sub> (SO <sub>4</sub> ) <sub>12</sub> ] <sup>2-</sup>    | 2.641                                      | 2.087            | 2.184              | 2.035              | 1.445            | 1.516            | 1.564            | 2.877        | 2.492 | 87.1              |
| [Lu <sub>2</sub> Pt <sub>12</sub> O <sub>8</sub> (SO <sub>4</sub> ) <sub>12</sub> ] <sup>2-</sup>    | 2.620                                      | 2.080            | 2.186              | 2.037              | 1.445            | 1.515            | 1.563            | 2.690        | 2.330 | 80.6              |
| [Pt <sub>12</sub> O <sub>8</sub> (PO <sub>4</sub> ) <sub>12</sub> ] <sup>16-</sup>                   | 2.609                                      | 2.044            | 2.225              | 2.069              | 1.531            | 1.566            | 1.591            | 3.063        | -     | 97.0              |
| [Li <sub>2</sub> Pt <sub>12</sub> O <sub>8</sub> (PO <sub>4</sub> ) <sub>12</sub> ] <sup>15-</sup>   | 2.623                                      | 2.052            | 2.206              | 2.055              | 1.527            | 1.566            | 1.595            | 2.675        | 2.316 | 81.3              |
| [Na <sub>2</sub> Pt <sub>12</sub> O <sub>8</sub> (PO <sub>4</sub> ) <sub>12</sub> ] <sup>15-</sup>   | 2.627                                      | 2.057            | 2.208              | 2.052              | 1.527            | 1.566            | 1.595            | 2.906        | 2.517 | 89.9              |
| [K <sub>2</sub> Pt <sub>12</sub> O <sub>8</sub> (PO <sub>4</sub> ) <sub>12</sub> ] <sup>15-</sup>    | 2.639                                      | 2.072            | 2.205              | 2.055              | 1.527            | 1.566            | 1.594            | 3.079        | 2.666 | 95.9              |
| [Rb <sub>2</sub> Pt <sub>12</sub> O <sub>8</sub> (PO <sub>4</sub> ) <sub>12</sub> ] <sup>15-</sup>   | 2.652                                      | 2.083            | 2.205              | 2.056              | 1.527            | 1.567            | 1.594            | 3.143        | 2.721 | 97.9              |
| [Cs <sub>2</sub> Pt <sub>12</sub> O <sub>8</sub> (PO <sub>4</sub> ) <sub>12</sub> ] <sup>15-</sup>   | 2.673                                      | 2.101            | 2.204              | 2.055              | 1.527            | 1.568            | 1.594            | 3.221        | 2.791 | 100.2             |
| [Be <sub>2</sub> Pt <sub>12</sub> O <sub>8</sub> (PO <sub>4</sub> ) <sub>12</sub> ] <sup>14-</sup>   | 2.610                                      | 2.063            | 2.197              | 2.048              | 1.524            | 1.565            | 1.599            | 2.514        | 2.177 | 75.1              |
| [Mg <sub>2</sub> Pt <sub>12</sub> O <sub>8</sub> (PO <sub>4</sub> ) <sub>12</sub> ] <sup>14-</sup>   | 2.627                                      | 2.070            | 2.195              | 2.046              | 1.523            | 1.566            | 1.599            | 2.615        | 2.265 | 78.3              |
| [Ca <sub>2</sub> Pt <sub>12</sub> O <sub>8</sub> (PO <sub>4</sub> ) <sub>12</sub> ] <sup>14-</sup>   | 2.643                                      | 2.076            | 2.193              | 2.043              | 1.523            | 1.566            | 1.598            | 2.784        | 2.411 | 84.2              |
| [Sr <sub>2</sub> Pt <sub>12</sub> O <sub>8</sub> (PO <sub>4</sub> ) <sub>12</sub> ] <sup>14-</sup>   | 2.655                                      | 2.082            | 2.192              | 2.042              | 1.523            | 1.567            | 1.597            | 2.947        | 2.553 | 90.1              |
| [Ba <sub>2</sub> Pt <sub>12</sub> O <sub>8</sub> (PO <sub>4</sub> ) <sub>12</sub> ] <sup>14-</sup>   | 2.667                                      | 2.097            | 2.190              | 2.044              | 1.523            | 1.567            | 1.597            | 3.103        | 2.687 | 95.4              |
| [La <sub>2</sub> Pt <sub>12</sub> O <sub>8</sub> (PO <sub>4</sub> ) <sub>12</sub> ] <sup>13-</sup>   | 2.666                                      | 2.095            | 2.181              | 2.034              | 1.520            | 1.567            | 1.597            | 2.889        | 2.502 | 87.2              |
| [Lu <sub>2</sub> Pt <sub>12</sub> O <sub>8</sub> (PO <sub>4</sub> ) <sub>12</sub> ] <sup>13-</sup>   | 2.642                                      | 2.088            | 2.184              | 2.036              | 1.520            | 1.567            | 1.601            | 2.700        | 2.338 | 80.5              |

\* Geometry has been provided in Table S7.

**Table S2:** Geometry parameters of  $\{Pt_{12}O_8(XO_4)_8\}$  and cation bearing  $\{M<Pt_{12}O_8(XO_4)_8\}$  based systems with X = S and P in BP86/TZP/ZORA-scalar/COSMO-water.

| Structural Type                 | Bond lengths and interatomic distances [Å] |                    |                  |                  |          |       | $\angle_{in}$ [°] |
|---------------------------------|--------------------------------------------|--------------------|------------------|------------------|----------|-------|-------------------|
|                                 | Pt- $\mu_3$ -(O)                           | Pt-O <sub>ax</sub> | S-O <sub>t</sub> | S-O <sub>b</sub> | d(O...O) | M...O |                   |
| $[Pt_{12}O_8(SO_4)_8]^{8-}$     | 1.976                                      | 2.134              | 1.474            | 1.545            | 2.645    | -     | 84.0              |
| $[Pt_{12}O_8(PO_4)_8]^{16-}$    | 1.991                                      | 2.127              | 1.543            | 1.594            | 2.669    | -     | 84.2              |
| $[Li<Pt_{12}O_8(SO_4)_8]^{7-}$  | 1.983                                      | 2.119              | 1.470            | 1.546            | 2.629    | 2.277 | 83.1              |
| $[Na<Pt_{12}O_8(SO_4)_8]^{7-}$  | 1.988                                      | 2.115              | 1.470            | 1.547            | 2.703    | 2.341 | 85.6              |
| $[K<Pt_{12}O_8(SO_4)_8]^{7-}$   | 1.999                                      | 2.107              | 1.471            | 1.550            | 2.847    | 2.465 | 90.8              |
| $[Rb<Pt_{12}O_8(SO_4)_8]^{7-}$  | 2.003                                      | 2.102              | 1.471            | 1.552            | 2.934    | 2.541 | 94.2              |
| $[Cs<Pt_{12}O_8(SO_4)_8]^{7-}$  | 2.014                                      | 2.099              | 1.472            | 1.558            | 3.079    | 2.667 | 99.7              |
| $[Be<Pt_{12}O_8(SO_4)_8]^{6-}$  | 1.979                                      | 2.112              | 1.466            | 1.547            | 2.531    | 2.192 | 79.5              |
| $[Mg<Pt_{12}O_8(SO_4)_8]^{6-}$  | 1.989                                      | 2.108              | 1.466            | 1.548            | 2.615    | 2.265 | 82.2              |
| $[Ca<Pt_{12}O_8(SO_4)_8]^{6-}$  | 2.001                                      | 2.102              | 1.466            | 1.549            | 2.734    | 2.367 | 86.2              |
| $[Sr<Pt_{12}O_8(SO_4)_8]^{6-}$  | 2.008                                      | 2.097              | 1.467            | 1.551            | 2.828    | 2.449 | 89.5              |
| $[Ba<Pt_{12}O_8(SO_4)_8]^{6-}$  | 2.016                                      | 2.093              | 1.467            | 1.553            | 2.943    | 2.549 | 93.8              |
| $[La<Pt_{12}O_8(SO_4)_8]^{5-}$  | 2.014                                      | 2.088              | 1.3463           | 1.552            | 2.829    | 2.450 | 89.3              |
| $[Lu<Pt_{12}O_8(SO_4)_8]^{5-}$  | 2.003                                      | 2.091              | 1.462            | 1.551            | 2.679    | 2.320 | 84.0              |
| $[Li<Pt_{12}O_8(PO_4)_8]^{15-}$ | 1.997                                      | 2.111              | 1.539            | 1.595            | 2.648    | 2.293 | 83.0              |
| $[Na<Pt_{12}O_8(PO_4)_8]^{15-}$ | 2.002                                      | 2.106              | 1.539            | 1.596            | 2.718    | 2.354 | 85.5              |
| $[K<Pt_{12}O_8(PO_4)_8]^{15-}$  | 2.015                                      | 2.101              | 1.539            | 1.599            | 2.868    | 2.484 | 90.7              |
| $[Rb<Pt_{12}O_8(PO_4)_8]^{15-}$ | 2.021                                      | 2.096              | 1.540            | 1.600            | 2.968    | 2.571 | 94.5              |
| $[Cs<Pt_{12}O_8(PO_4)_8]^{15-}$ | 2.030                                      | 2.087              | 1.542            | 1.605            | 3.117    | 2.699 | 100.3             |
| $[Be<Pt_{12}O_8(PO_4)_8]^{14-}$ | 1.992                                      | 2.101              | 1.534            | 1.597            | 2.541    | 2.200 | 79.2              |
| $[Mg<Pt_{12}O_8(PO_4)_8]^{14-}$ | 2.004                                      | 2.097              | 1.534            | 1.597            | 2.628    | 2.276 | 82.0              |
| $[Ca<Pt_{12}O_8(PO_4)_8]^{14-}$ | 2.014                                      | 2.092              | 1.535            | 1.599            | 2.747    | 2.379 | 86.0              |
| $[Sr<Pt_{12}O_8(PO_4)_8]^{14-}$ | 2.023                                      | 2.089              | 1.535            | 1.600            | 2.845    | 2.464 | 89.4              |
| $[Ba<Pt_{12}O_8(PO_4)_8]^{14-}$ | 2.032                                      | 2.083              | 1.536            | 1.602            | 2.966    | 2.569 | 93.8              |
| $[La<Pt_{12}O_8(PO_4)_8]^{13-}$ | 2.029                                      | 2.076              | 1.529            | 1.602            | 2.842    | 2.461 | 89.9              |
| $[Lu<Pt_{12}O_8(PO_4)_8]^{13-}$ | 2.018                                      | 2.081              | 1.530            | 1.600            | 2.693    | 2.332 | 83.7              |

\* Geometry has been provided in Table S7.

**Table S3:** Energies of the HOMO, LUMO and the gap energies ( $\Delta_{LUMO-HOMO}$ ) in eV for different systems obtained by single point calculations at B3LYP/TZP/ZORA-scalar/COSMO-water level.

|                           | $\{M<Pt_{12}O_8(SO_4)_{12}\}$ |                  |                 |                 | $\{M<Pt_{12}O_8(PO_4)_{12}\}$ |                  |                 |                 | $\{M<Pt_{12}O_8(SO_4)_8\}$ |                  |                 |                 | $\{M<Pt_{12}O_8(PO_4)_8\}$ |                  |                 |                 |
|---------------------------|-------------------------------|------------------|-----------------|-----------------|-------------------------------|------------------|-----------------|-----------------|----------------------------|------------------|-----------------|-----------------|----------------------------|------------------|-----------------|-----------------|
|                           | $\emptyset$                   | Be <sup>2+</sup> | Na <sup>+</sup> | Cs <sup>+</sup> | $\emptyset$                   | Be <sup>2+</sup> | Na <sup>+</sup> | Cs <sup>+</sup> | $\emptyset$                | Be <sup>2+</sup> | Na <sup>+</sup> | Cs <sup>+</sup> | $\emptyset$                | Be <sup>2+</sup> | Na <sup>+</sup> | Cs <sup>+</sup> |
| HOMO [eV]                 | -8.80                         | -9.29            | -9.00           | -9.23           | -6.20                         | -6.96            | -6.40           | -6.70           | -5.00                      | -5.71            | -5.40           | -5.39           | -3.70                      | -4.33            | -4.10           | -3.88           |
| LUMO [eV]                 | -5.80                         | -6.15            | -6.20           | -6.28           | -3.20                         | -3.67            | -3.50           | -3.63           | -1.70                      | -2.26            | -2.20           | -2.67           | -0.20                      | -0.55            | -0.50           | -1.01           |
| $\Delta_{LUMO-HOMO}$ [eV] | 3.00                          | 3.14             | 2.80            | 2.94            | 3.00                          | 3.30             | 2.90            | 3.06            | 3.30                       | 3.44             | 3.20            | 2.72            | 3.50                       | 3.78             | 3.60            | 2.87            |

**Table S4:** Relative distributions of the HOMO, LUMO and the energy difference in different systems obtained by single point calculations at B3LYP/TZP/ZORA-scalar/COSMO-water level.

|                          | $[Pt_{12}O_8(SO_4)_{12}]^{4-}$ |     | $[K_8Pt_{12}O_8(SO_4)_{12}]^{4+}$ |     | $[Pt_{12}O_8(SO_4)_{12}]^{8-}$ |    | $[K_8Pt_{12}O_8(SO_4)_{12}]^{2-}$ |    | $[Pt_{12}O_8(SO_4)_{12}]^{16-}$ |    | $[K_8Pt_{12}O_8(SO_4)_{12}]^{8-}$ |    |
|--------------------------|--------------------------------|-----|-----------------------------------|-----|--------------------------------|----|-----------------------------------|----|---------------------------------|----|-----------------------------------|----|
|                          | Pt                             | O   | Pt                                | O   | Pt                             | O  | Pt                                | O  | Pt                              | O  | Pt                                | O  |
| HOMO [%]                 | 33                             | 64  | 26                                | 69  | 74                             | 18 | 74                                | 18 | 86                              | 13 | 86                                | 10 |
| LUMO [%]                 | 66                             | 23  | 66                                | 24  | 73                             | 19 | 72                                | 20 | 73                              | 19 | 72                                | 17 |
| $\Delta_{LUMO-HOMO}$ [%] | 33                             | -40 | 40                                | -45 | -2                             | 1  | -2                                | 2  | -13                             | 6  | -14                               | 7  |

**Table S5:** Bonding energies of the monoprotinated  $[\text{HPt}_{12}\text{O}_8(\text{SO}_4)_{12}]^{3-}$  and  $[\text{HPt}_{12}\text{O}_8(\text{PO}_4)_{12}]^{15-}$  species calculated at BP86/TZP/ZORA-scalar/COSMO-water and B3LYP/TZP/ZORA-scalar/COSMO-water level.

| Site of protonation    | $[\text{HPt}_{12}\text{O}_8(\text{SO}_4)_{12}]^{3-}$ |                                               |                                                     |                                                      | $[\text{HPt}_{12}\text{O}_8(\text{PO}_4)_{12}]^{15-}$ |                                               |                                                     |                                                      |
|------------------------|------------------------------------------------------|-----------------------------------------------|-----------------------------------------------------|------------------------------------------------------|-------------------------------------------------------|-----------------------------------------------|-----------------------------------------------------|------------------------------------------------------|
|                        | $E^{\text{BP86}}$<br>[kJ·mol <sup>-1</sup> ]         | $E^{\text{B3LYP}}$<br>[kJ·mol <sup>-1</sup> ] | $\Delta E^{\text{BP86}}$<br>[kJ·mol <sup>-1</sup> ] | $\Delta E^{\text{B3LYP}}$<br>[kJ·mol <sup>-1</sup> ] | $E^{\text{BP86}}$<br>[kJ·mol <sup>-1</sup> ]          | $E^{\text{B3LYP}}$<br>[kJ·mol <sup>-1</sup> ] | $\Delta E^{\text{BP86}}$<br>[kJ·mol <sup>-1</sup> ] | $\Delta E^{\text{B3LYP}}$<br>[kJ·mol <sup>-1</sup> ] |
| $\mu_3\text{-O}$ (in)  | -46040,9                                             | -57949,4                                      | 0                                                   | 0                                                    | -56860,5                                              | -69083,9                                      | 0                                                   | 0                                                    |
| $\mu_3\text{-O}$ (out) | -46067,9                                             | -57977,3                                      | -27,07                                              | -27,9                                                | -56859,3                                              | -69076,2                                      | 1,26                                                | 7,68                                                 |
| $\mu_2\text{-O}_a$     | -46083,3                                             | -57991,6                                      | -42,42                                              | -42,2                                                | -56843,1                                              | -69060                                        | 17,46                                               | 23,9                                                 |
| $\mu_2\text{-O}_b$     | -46097,3                                             | -58010,6                                      | -56,44                                              | -61,2                                                | -56871,4                                              | -69093,4                                      | -10,92                                              | -9,48                                                |
| $\eta\text{-O}$        | -46100,4                                             | -58016,8                                      | -59,54                                              | -67,4                                                | -56862                                                | -69083,7                                      | -1,49                                               | 0,18                                                 |

**Table S6:** Bonding energies of the monoprotinated  $[\text{HPt}_{12}\text{O}_8(\text{SO}_4)_8]^{7-}$  and  $[\text{HPt}_{12}\text{O}_8(\text{PO}_4)_8]^{15-}$  species calculated at BP86/TZP/ZORA-scalar/COSMO-water and B3LYP/TZP/ZORA-scalar/COSMO-water level.

| Site of protonation | $[\text{HPt}_{12}\text{O}_8(\text{SO}_4)_8]^{7-}$ |                                               |                                                     |                                                      | $[\text{HPt}_{12}\text{O}_8(\text{PO}_4)_8]^{15-}$ |                                               |                                                     |                                                      |
|---------------------|---------------------------------------------------|-----------------------------------------------|-----------------------------------------------------|------------------------------------------------------|----------------------------------------------------|-----------------------------------------------|-----------------------------------------------------|------------------------------------------------------|
|                     | $E^{\text{BP86}}$<br>[kJ·mol <sup>-1</sup> ]      | $E^{\text{B3LYP}}$<br>[kJ·mol <sup>-1</sup> ] | $\Delta E^{\text{BP86}}$<br>[kJ·mol <sup>-1</sup> ] | $\Delta E^{\text{B3LYP}}$<br>[kJ·mol <sup>-1</sup> ] | $E^{\text{BP86}}$<br>[kJ·mol <sup>-1</sup> ]       | $E^{\text{B3LYP}}$<br>[kJ·mol <sup>-1</sup> ] | $\Delta E^{\text{BP86}}$<br>[kJ·mol <sup>-1</sup> ] | $\Delta E^{\text{B3LYP}}$<br>[kJ·mol <sup>-1</sup> ] |
| $\mu_3\text{-O}$    | -36560,6                                          | -45599,4                                      | 0                                                   | 0                                                    | -43078,2                                           | -52234,3                                      | 0                                                   | 0                                                    |
| $\mu_2\text{-O}$    | -36435,6                                          | -45445,8                                      | 125,05                                              | 153,56                                               | -42936,3                                           | -52071                                        | 141,98                                              | 163,31                                               |
| $\eta\text{-O}$     | -36436,2                                          | -45454,8                                      | 124,4                                               | 144,61                                               | -42954,5                                           | -52091,3                                      | 123,7                                               | 143,05                                               |

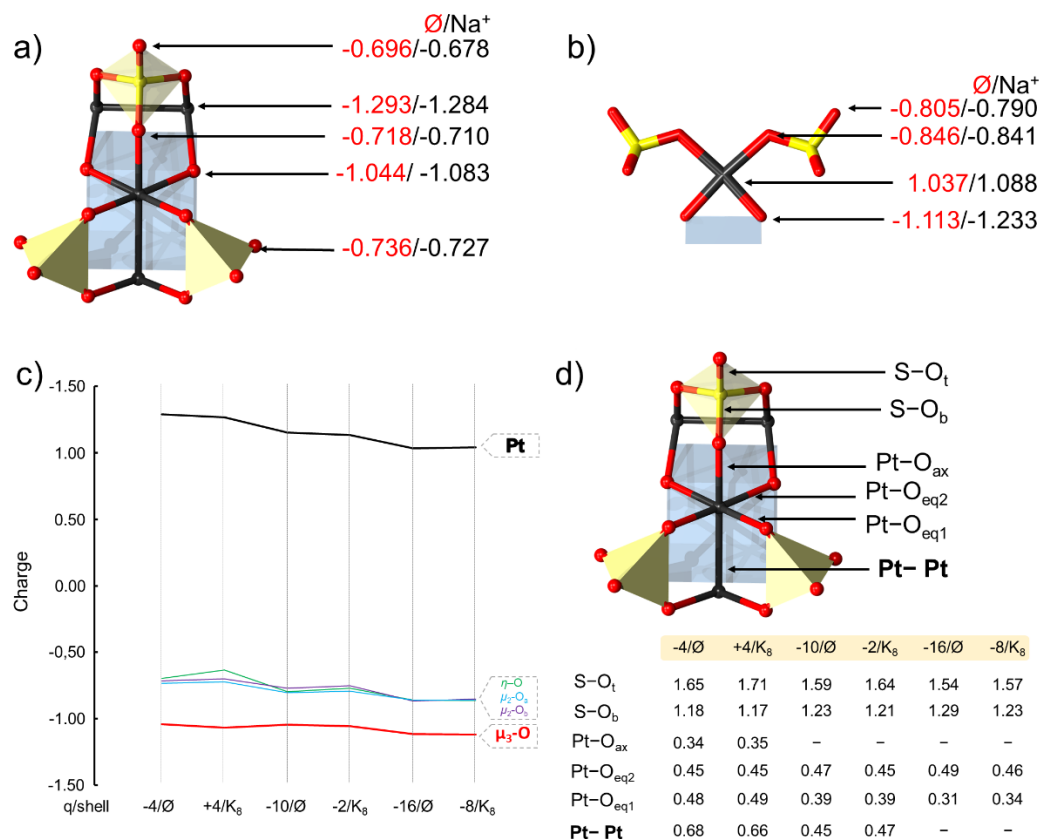

**Figure S1.** a) Mulliken charge populations of fractions of  $[\text{Pt}_{12}\text{O}_8(\text{SO}_4)_{12}]^{4-}/[\text{NaPt}_{12}\text{O}_8(\text{SO}_4)_{12}]^{3-}$ ; b) Mulliken charge populations of fractions of  $[\text{Pt}_{12}\text{O}_8(\text{SO}_4)_8]^{8-}/[\text{NaPt}_{12}\text{O}_8(\text{SO}_4)_8]^{7-}$ ; c) Mulliken charge populations at different oxo sites in  $\{\text{Pt}_{12}\text{O}_8(\text{SO}_4)_{12}\}/\{\text{K}_8\text{Pt}_{12}\text{O}_8(\text{SO}_4)_{12}\}$  systems as a function of the overall charge; d) Typical Mayer bond multiplicity indices as calculated for  $\{\text{Pt}_{12}\text{O}_8(\text{SO}_4)_{12}\}^q$  ( $q = -4, -10$  and  $-16$ ) and  $\{\text{K}_8[\text{Pt}_{12}\text{O}_8(\text{SO}_4)_{12}]^q$  ( $q = +4, -2$  and  $-8$ ) models. Bond multiplicity indices lower 0.2 are by default not printed (i.e. omitted).

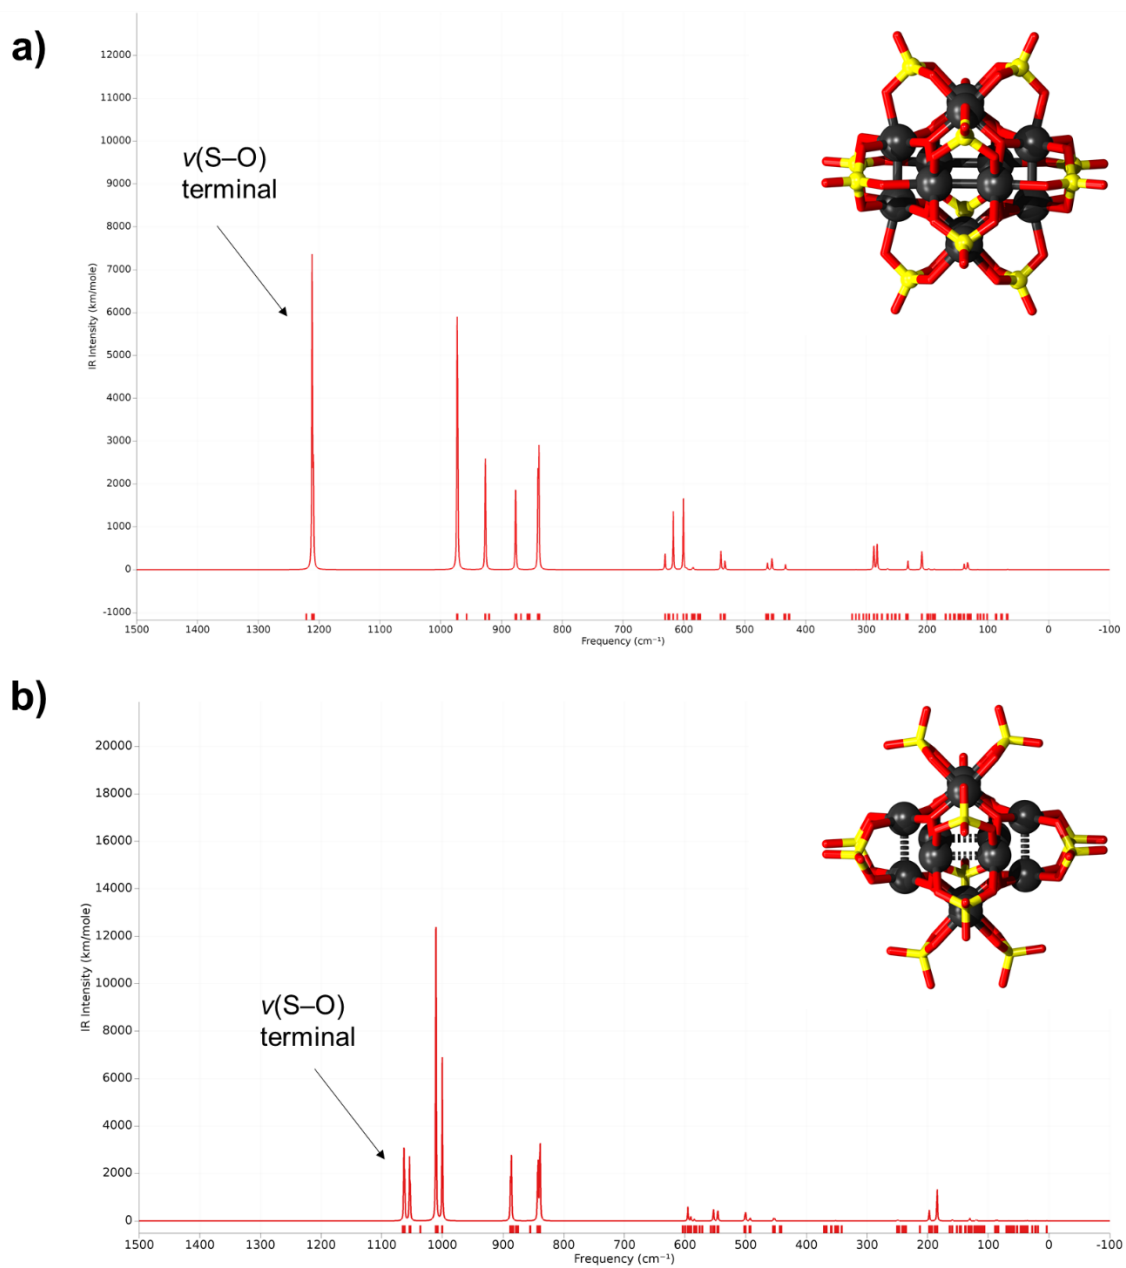

**Figure S2:** Calculated spectrum of a)  $[\text{Pt}_{12}\text{O}_8(\text{SO}_4)_{12}]^{4-}$  and b)  $[\text{Pt}_{12}\text{O}_8(\text{SO}_4)_{12}]^{16-}$  at BP86/TZP/ZORA/COSMO-water level.

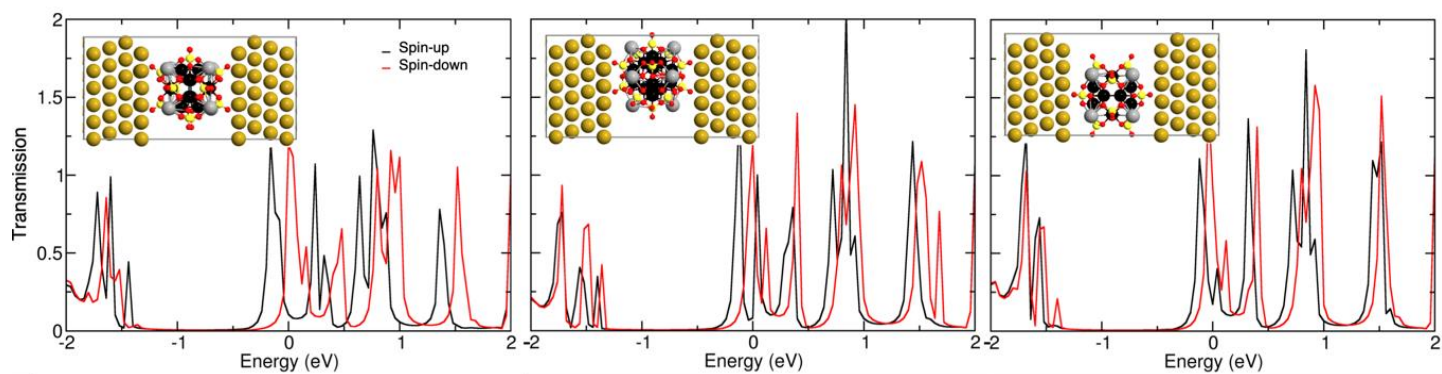

**Figure S3.** The zero-bias transmission spectra of the POM-based junction with 8 potassium for three different POM orientations. The spin up and spin down coefficients are shown with black and red, respectively. Inset shows the optimized geometry of the model.

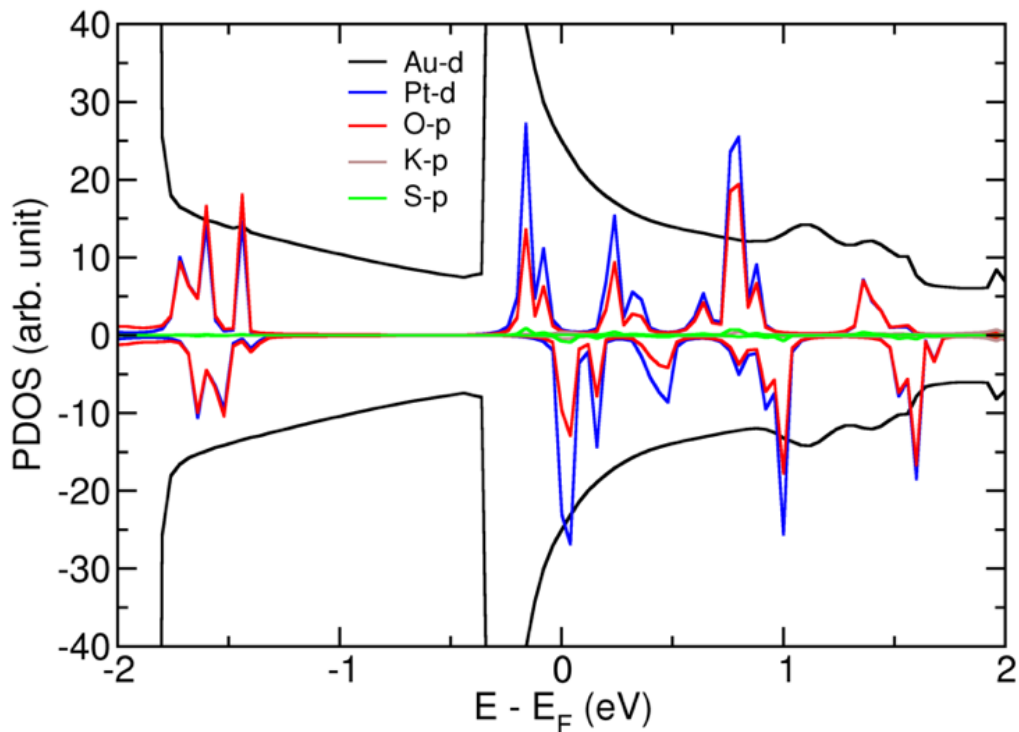

**Figure S4:** Projected density of states (PDOS) for the POM-based junction with  $\{K_8[Pt_{12}O_8(SO_4)_{12}]\}$ .

**Figure S5:** The comparison between transmission through the Au/POM/Au junction with  $\{K_8[Pt_{12}O_8(SO_4)_{12}]\}$  calculated using PBE and BP86 functional.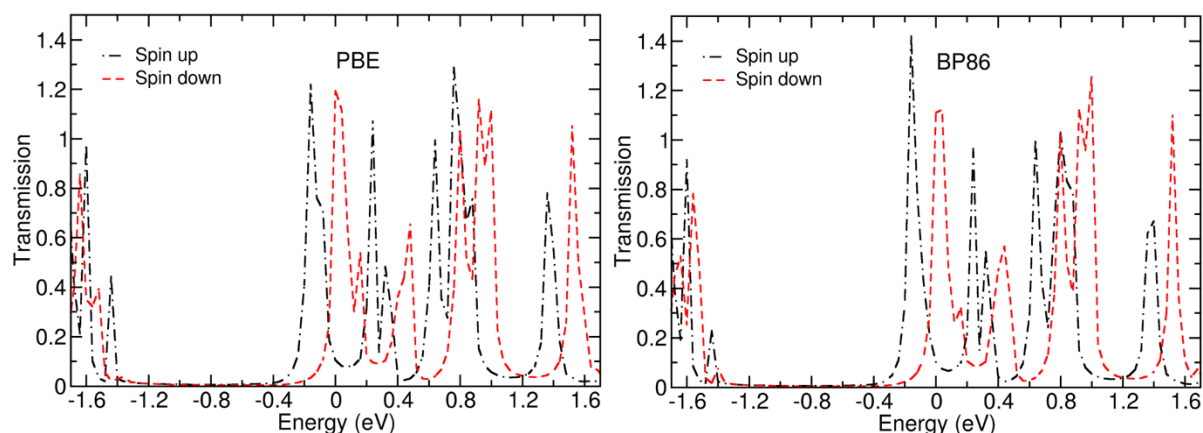**Table S7:** Cartesian coordinates (in Angstroms) of the individual POMs and the Au/POM/Au junctions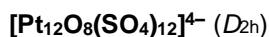

Level: PBE/TZP/ZORA-scalar/COSMO-water

80

|    |             |             |             |
|----|-------------|-------------|-------------|
| Pt | 2.84335273  | 1.28964133  | 0.00000000  |
| Pt | 0.00000000  | 2.84335273  | -1.28964133 |
| Pt | 1.28964133  | 0.00000000  | -2.84335273 |
| Pt | 1.28964133  | 0.00000000  | 2.84335273  |
| Pt | 0.00000000  | 2.84335273  | 1.28964133  |
| Pt | -1.28964133 | 0.00000000  | -2.84335273 |
| Pt | -2.84335273 | 1.28964133  | -0.00000000 |
| Pt | 2.84335273  | -1.28964133 | -0.00000000 |
| Pt | 0.00000000  | -2.84335273 | -1.28964133 |
| Pt | 0.00000000  | -2.84335273 | 1.28964133  |
| Pt | -1.28964133 | 0.00000000  | 2.84335273  |
| Pt | -2.84335273 | -1.28964133 | -0.00000000 |
| S  | 4.53666864  | 0.00000000  | -2.29180522 |
| S  | 4.53666864  | 0.00000000  | 2.29180522  |
| S  | 2.33552455  | 4.53666864  | 0.00000000  |
| S  | -2.29180522 | 4.53666864  | -0.00000000 |
| S  | 0.00000000  | 2.29180522  | -4.53666864 |
| S  | 0.00000000  | -2.29180522 | -4.53666864 |
| S  | 0.00000000  | 2.29180522  | 4.53666864  |
| S  | 0.00000000  | -2.29180522 | 4.53666864  |
| S  | -4.53666864 | 0.00000000  | -2.29180522 |
| S  | -4.53666864 | 0.00000000  | 2.29180522  |
| S  | 2.29180522  | -4.53666864 | -0.00000000 |
| S  | -2.29180522 | -4.53666864 | -0.00000000 |
| O  | 1.52704430  | 1.52704430  | -1.52704430 |
| O  | 1.52704430  | 1.52704430  | 1.52704430  |
| O  | 4.37618377  | 1.25236284  | -1.39047108 |
| O  | 4.37618377  | 1.25236284  | 1.39047108  |
| O  | 3.34707755  | 3.44938190  | -0.00000000 |
| O  | -1.52704430 | 1.52704430  | -1.52704430 |
| O  | -1.39047108 | 4.37618377  | -1.25236284 |
| O  | 1.39047108  | 4.37618377  | -1.25236284 |
| O  | 0.00000000  | 3.34707755  | -3.44938190 |
| O  | 1.52704430  | -1.52704430 | -1.52704430 |



|   |             |             |             |
|---|-------------|-------------|-------------|
| O | 3.44938190  | 0.00000000  | -3.34707755 |
| O | 1.25236284  | -1.39047108 | -4.37618377 |
| O | 1.25236284  | 1.39047108  | -4.37618377 |
| O | 1.52704430  | -1.52704430 | 1.52704430  |
| O | 1.25236284  | 1.39047108  | 4.37618377  |
| O | 1.25236284  | -1.39047108 | 4.37618377  |
| O | 3.44938190  | 0.00000000  | 3.34707755  |
| O | -1.52704430 | 1.52704430  | 1.52704430  |
| O | 0.00000000  | 3.34707755  | 3.44938190  |
| O | -1.39047108 | 4.37618377  | 1.25236284  |
| O | 1.39047108  | 4.37618377  | 1.25236284  |
| O | 4.37618377  | -1.25236284 | -1.39047108 |
| O | 5.85938705  | 0.00000000  | -2.89098224 |
| O | 4.37618377  | -1.25236284 | 1.39047108  |
| O | 5.85938705  | 0.00000000  | 2.89098224  |
| O | 2.89098224  | 5.85938705  | -0.00000000 |
| O | -1.52704430 | -1.52704430 | -1.52704430 |
| O | -1.25236284 | -1.39047108 | -4.37618377 |
| O | -1.25236284 | 1.39047108  | -4.37618377 |
| O | -3.44938190 | 0.00000000  | -3.34707755 |
| O | -3.34707755 | 3.44938190  | -0.00000000 |
| O | -4.37618377 | 1.25236284  | 1.39047108  |
| O | -4.37618377 | 1.25236284  | -1.39047108 |
| O | -2.89098224 | 5.85938705  | -0.00000000 |
| O | 0.00000000  | 2.89098224  | -5.85938705 |
| O | 3.34707755  | -3.44938190 | -0.00000000 |
| O | 0.00000000  | -3.34707755 | -3.44938190 |
| O | 1.39047108  | -4.37618377 | -1.25236284 |
| O | -1.39047108 | -4.37618377 | -1.25236284 |
| O | 0.00000000  | -2.89098224 | -5.85938705 |
| O | -1.52704430 | -1.52704430 | 1.52704430  |
| O | 1.39047108  | -4.37618377 | 1.25236284  |
| O | -1.39047108 | -4.37618377 | 1.25236284  |
| O | 0.00000000  | -3.34707755 | 3.44938190  |
| O | -1.25236284 | 1.39047108  | 4.37618377  |
| O | 0.00000000  | 2.89098224  | 5.85938705  |
| O | -1.25236284 | -1.39047108 | 4.37618377  |
| O | 0.00000000  | -2.89098224 | 5.85938705  |
| O | -3.44938190 | 0.00000000  | 3.34707755  |
| O | -4.37618377 | -1.25236284 | 1.39047108  |
| O | -4.37618377 | -1.25236284 | -1.39047108 |
| O | -3.34707755 | -3.44938190 | -0.00000000 |
| O | -5.85938705 | 0.00000000  | -2.89098224 |
| O | -5.85938705 | 0.00000000  | 2.89098224  |
| O | 2.89098224  | -5.85938705 | -0.00000000 |
| O | -2.89098224 | -5.85938705 | -0.00000000 |

**[Pt<sub>12</sub>O<sub>8</sub>(SO<sub>4</sub>)<sub>12</sub>]<sup>10-</sup> (D<sub>2h</sub>)**

Level: PBE/TZP/ZORA-scalar/COSMO-water

80

|    |             |             |             |
|----|-------------|-------------|-------------|
| Pt | 2.84823608  | 1.31680789  | 0.00000000  |
| Pt | 0.00000000  | 2.84755372  | -1.31669490 |
| Pt | 1.31683265  | 0.00000000  | -2.84794548 |
| Pt | 1.31683265  | 0.00000000  | 2.84794548  |
| Pt | 0.00000000  | 2.84755372  | 1.31669490  |
| Pt | -1.31683265 | 0.00000000  | -2.84794548 |
| Pt | -2.84823608 | 1.31680789  | -0.00000000 |
| Pt | 2.84823608  | -1.31680789 | -0.00000000 |
| Pt | 0.00000000  | -2.84755372 | -1.31669490 |
| Pt | 0.00000000  | -2.84755372 | 1.31669490  |

|    |             |             |             |
|----|-------------|-------------|-------------|
| Pt | -1.31683265 | 0.00000000  | 2.84794548  |
| Pt | -2.84823608 | -1.31680789 | -0.00000000 |
| S  | 4.67051843  | 0.00000000  | -2.29060051 |
| S  | 4.67051843  | 0.00000000  | 2.29060051  |
| S  | 2.29034065  | 4.67057669  | -0.00000000 |
| S  | -2.29034065 | 4.67057669  | -0.00000000 |
| S  | 0.00000000  | 2.29084185  | -4.66995423 |
| S  | 0.00000000  | -2.29084185 | -4.66995423 |
| S  | 0.00000000  | 2.29084185  | 4.66995423  |
| S  | 0.00000000  | -2.29084185 | 4.66995423  |
| S  | -4.67051843 | 0.00000000  | -2.29060051 |
| S  | -4.67051843 | 0.00000000  | 2.29060051  |
| S  | 2.29034065  | -4.67057669 | -0.00000000 |
| S  | -2.29034065 | -4.67057669 | -0.00000000 |
| O  | 1.51947923  | 1.51917589  | -1.51922019 |
| O  | 1.51947923  | 1.51917589  | 1.51922019  |
| O  | 4.45268435  | 1.25558096  | -1.42019508 |
| O  | 4.45268435  | 1.25558096  | 1.42019508  |
| O  | 3.42794313  | 3.69008047  | -0.00000000 |
| O  | -1.51947923 | 1.51917589  | -1.51922019 |
| O  | -1.41989431 | 4.45186219  | -1.25549821 |
| O  | 1.41989431  | 4.45186219  | -1.25549821 |
| O  | 0.00000000  | 3.42791763  | -3.68876330 |
| O  | 1.51947923  | -1.51917589 | -1.51922019 |
| O  | 3.68873183  | 0.00000000  | -3.42735872 |
| O  | 1.25533370  | -1.42013248 | -4.45201014 |
| O  | 1.25533370  | 1.42013248  | -4.45201014 |
| O  | 1.51947923  | -1.51917589 | 1.51922019  |
| O  | 1.25533370  | 1.42013248  | 4.45201014  |
| O  | 1.25533370  | -1.42013248 | 4.45201014  |
| O  | 3.68873183  | 0.00000000  | 3.42735872  |
| O  | -1.51947923 | 1.51917589  | 1.51922019  |
| O  | 0.00000000  | 3.42791763  | 3.68876330  |
| O  | -1.41989431 | 4.45186219  | 1.25549821  |
| O  | 1.41989431  | 4.45186219  | 1.25549821  |
| O  | 4.45268435  | -1.25558096 | -1.42019508 |
| O  | 6.06805317  | 0.00000000  | -2.76876453 |
| O  | 4.45268435  | -1.25558096 | 1.42019508  |
| O  | 6.06805317  | 0.00000000  | 2.76876453  |
| O  | 2.76624244  | 6.06890449  | -0.00000000 |
| O  | -1.51947923 | -1.51917589 | -1.51922019 |
| O  | -1.25533370 | -1.42013248 | -4.45201014 |
| O  | -1.25533370 | 1.42013248  | -4.45201014 |
| O  | -3.68873183 | 0.00000000  | -3.42735872 |
| O  | -3.42794313 | 3.69008047  | -0.00000000 |
| O  | -4.45268435 | 1.25558096  | 1.42019508  |
| O  | -4.45268435 | 1.25558096  | -1.42019508 |
| O  | -2.76624244 | 6.06890449  | -0.00000000 |
| O  | 0.00000000  | 2.76815580  | -6.06780463 |
| O  | 3.42794313  | -3.69008047 | -0.00000000 |
| O  | 0.00000000  | -3.42791763 | -3.68876330 |
| O  | 1.41989431  | -4.45186219 | -1.25549821 |
| O  | -1.41989431 | -4.45186219 | -1.25549821 |
| O  | 0.00000000  | -2.76815580 | -6.06780463 |
| O  | -1.51947923 | -1.51917589 | 1.51922019  |
| O  | 1.41989431  | -4.45186219 | 1.25549821  |
| O  | -1.41989431 | -4.45186219 | 1.25549821  |
| O  | 0.00000000  | -3.42791763 | 3.68876330  |
| O  | -1.25533370 | 1.42013248  | 4.45201014  |
| O  | 0.00000000  | 2.76815580  | 6.06780463  |
| O  | -1.25533370 | -1.42013248 | 4.45201014  |
| O  | 0.00000000  | -2.76815580 | 6.06780463  |

|   |             |             |             |
|---|-------------|-------------|-------------|
| O | -3.68873183 | 0.00000000  | 3.42735872  |
| O | -4.45268435 | -1.25558096 | 1.42019508  |
| O | -4.45268435 | -1.25558096 | -1.42019508 |
| O | -3.42794313 | -3.69008047 | -0.00000000 |
| O | -6.06805317 | 0.00000000  | -2.76876453 |
| O | -6.06805317 | 0.00000000  | 2.76876453  |
| O | 2.76624244  | -6.06890449 | -0.00000000 |
| O | -2.76624244 | -6.06890449 | -0.00000000 |

**[Pt<sub>12</sub>O<sub>8</sub>(SO<sub>4</sub>)<sub>12</sub>]<sup>16-</sup> (D<sub>2h</sub>)**

Level: PBE/TZP/ZORA-scalar/COSMO-water

80

|    |             |             |             |
|----|-------------|-------------|-------------|
| Pt | 2.79584499  | 1.37306537  | 0.00000000  |
| Pt | 0.00000000  | 2.80472997  | -1.38062768 |
| Pt | 1.37789623  | -0.00000000 | -2.80888912 |
| Pt | 1.37789623  | -0.00000000 | 2.80888912  |
| Pt | 0.00000000  | 2.80472997  | 1.38062768  |
| Pt | -1.37789623 | 0.00000000  | -2.80888912 |
| Pt | -2.79584499 | 1.37306537  | -0.00000000 |
| Pt | 2.79584499  | -1.37306537 | -0.00000000 |
| Pt | 0.00000000  | -2.80472997 | -1.38062768 |
| Pt | 0.00000000  | -2.80472997 | 1.38062768  |
| Pt | -1.37789623 | 0.00000000  | 2.80888912  |
| Pt | -2.79584499 | -1.37306537 | -0.00000000 |
| S  | 5.06311526  | -0.00000000 | -2.01280589 |
| S  | 5.06311526  | -0.00000000 | 2.01280589  |
| S  | 2.01204053  | 5.06812424  | 0.00000000  |
| S  | -2.01204053 | 5.06812424  | -0.00000000 |
| S  | 0.00000000  | 2.01280263  | -5.07350758 |
| S  | 0.00000000  | -2.01280263 | -5.07350758 |
| S  | 0.00000000  | 2.01280263  | 5.07350758  |
| S  | 0.00000000  | -2.01280263 | 5.07350758  |
| S  | -5.06311526 | 0.00000000  | -2.01280589 |
| S  | -5.06311526 | 0.00000000  | 2.01280589  |
| S  | 2.01204053  | -5.06812424 | -0.00000000 |
| S  | -2.01204053 | -5.06812424 | -0.00000000 |
| O  | 1.58436044  | 1.58614612  | -1.58990881 |
| O  | 1.58436044  | 1.58614612  | 1.58990880  |
| O  | 4.37840455  | 1.27262594  | -1.48603518 |
| O  | 4.37840455  | 1.27262594  | 1.48603517  |
| O  | 3.50990426  | 4.98382724  | -0.00000000 |
| O  | -1.58436044 | 1.58614612  | -1.58990881 |
| O  | -1.48218324 | 4.38799212  | -1.27434060 |
| O  | 1.48218324  | 4.38799212  | -1.27434060 |
| O  | 0.00000000  | 3.51099710  | -4.99125017 |
| O  | 1.58436044  | -1.58614612 | -1.58990881 |
| O  | 4.98846014  | -0.00000000 | -3.51145706 |
| O  | 1.27379172  | -1.48376869 | -4.39193142 |
| O  | 1.27379172  | 1.48376869  | -4.39193142 |
| O  | 1.58436044  | -1.58614612 | 1.58990880  |
| O  | 1.27379172  | 1.48376869  | 4.39193141  |
| O  | 1.27379172  | -1.48376869 | 4.39193141  |
| O  | 4.98846014  | -0.00000000 | 3.51145706  |
| O  | -1.58436044 | 1.58614612  | 1.58990880  |
| O  | 0.00000000  | 3.51099710  | 4.99125017  |
| O  | -1.48218324 | 4.38799212  | 1.27434060  |
| O  | 1.48218324  | 4.38799212  | 1.27434060  |
| O  | 4.37840455  | -1.27262594 | -1.48603518 |
| O  | 6.49724603  | -0.00000000 | -1.57905017 |
| O  | 4.37840455  | -1.27262594 | 1.48603517  |

|   |             |             |             |
|---|-------------|-------------|-------------|
| O | 6.49724603  | -0.00000000 | 1.57905017  |
| O | 1.58648910  | 6.50446848  | -0.00000000 |
| O | -1.58436044 | -1.58614612 | -1.58990881 |
| O | -1.27379172 | -1.48376869 | -4.39193142 |
| O | -1.27379172 | 1.48376869  | -4.39193142 |
| O | -4.98846014 | 0.00000000  | -3.51145706 |
| O | -3.50990426 | 4.98382724  | -0.00000000 |
| O | -4.37840455 | 1.27262594  | 1.48603517  |
| O | -4.37840455 | 1.27262594  | -1.48603518 |
| O | -1.58648910 | 6.50446848  | -0.00000000 |
| O | 0.00000000  | 1.58516032  | -6.50932154 |
| O | 3.50990426  | -4.98382724 | -0.00000000 |
| O | 0.00000000  | -3.51099710 | -4.99125017 |
| O | 1.48218324  | -4.38799212 | -1.27434060 |
| O | -1.48218324 | -4.38799212 | -1.27434060 |
| O | 0.00000000  | -1.58516032 | -6.50932154 |
| O | -1.58436044 | -1.58614612 | 1.58990880  |
| O | 1.48218324  | -4.38799212 | 1.27434060  |
| O | -1.48218324 | -4.38799212 | 1.27434060  |
| O | 0.00000000  | -3.51099710 | 4.99125017  |
| O | -1.27379172 | 1.48376869  | 4.39193141  |
| O | 0.00000000  | 1.58516032  | 6.50932154  |
| O | -1.27379172 | -1.48376869 | 4.39193141  |
| O | 0.00000000  | -1.58516032 | 6.50932154  |
| O | -4.98846014 | 0.00000000  | 3.51145706  |
| O | -4.37840455 | -1.27262594 | 1.48603517  |
| O | -4.37840455 | -1.27262594 | -1.48603518 |
| O | -3.50990426 | -4.98382724 | -0.00000000 |
| O | -6.49724603 | 0.00000000  | -1.57905017 |
| O | -6.49724603 | 0.00000000  | 1.57905017  |
| O | 1.58648910  | -6.50446848 | -0.00000000 |
| O | -1.58648910 | -6.50446848 | -0.00000000 |

**[Pt<sub>12</sub>O<sub>8</sub>(SO<sub>4</sub>)<sub>12</sub>]<sup>4-</sup> (D<sub>2h</sub>)**

Level: BP86/TZP/ZORA-scalar/COSMO-water

80

|    |             |             |             |
|----|-------------|-------------|-------------|
| Pt | 2.84593804  | 1.29096605  | -0.00000000 |
| Pt | 0.00000000  | 2.84550087  | -1.29095354 |
| Pt | 1.29089409  | 0.00000000  | -2.84542517 |
| Pt | 1.29089409  | 0.00000000  | 2.84542517  |
| Pt | 0.00000000  | 2.84550087  | 1.29095354  |
| Pt | -1.29089409 | 0.00000000  | -2.84542517 |
| Pt | -2.84593804 | 1.29096605  | 0.00000000  |
| Pt | 2.84593804  | -1.29096605 | -0.00000000 |
| Pt | 0.00000000  | -2.84550087 | -1.29095354 |
| Pt | 0.00000000  | -2.84550087 | 1.29095354  |
| Pt | -1.29089409 | 0.00000000  | 2.84542517  |
| Pt | -2.84593804 | -1.29096605 | 0.00000000  |
| S  | 4.54182383  | 0.00000000  | -2.29355262 |
| S  | 4.54182383  | 0.00000000  | 2.29355262  |
| S  | 2.29325694  | 4.54166237  | -0.00000000 |
| S  | -2.29325694 | 4.54166237  | 0.00000000  |
| S  | 0.00000000  | 2.29335879  | -4.54158625 |
| S  | 0.00000000  | -2.29335879 | -4.54158625 |
| S  | 0.00000000  | 2.29335879  | 4.54158625  |
| S  | 0.00000000  | -2.29335879 | 4.54158625  |
| S  | -4.54182383 | 0.00000000  | -2.29355262 |
| S  | -4.54182383 | 0.00000000  | 2.29355262  |
| S  | 2.29325694  | -4.54166237 | 0.00000000  |
| S  | -2.29325694 | -4.54166237 | 0.00000000  |

|   |             |             |             |
|---|-------------|-------------|-------------|
| O | 1.52828954  | 1.52816933  | -1.52805830 |
| O | 1.52828954  | 1.52816933  | 1.52805830  |
| O | 4.37950063  | 1.25349599  | -1.39114940 |
| O | 4.37950063  | 1.25349599  | 1.39114940  |
| O | 3.34897760  | 3.45190493  | 0.00000000  |
| O | -1.52828954 | 1.52816933  | -1.52805830 |
| O | -1.39147761 | 4.37862640  | -1.25366363 |
| O | 1.39147761  | 4.37862640  | -1.25366363 |
| O | 0.00000000  | 3.34876429  | -3.45163972 |
| O | 1.52828954  | -1.52816933 | -1.52805830 |
| O | 3.45160300  | 0.00000000  | -3.34845509 |
| O | 1.25349657  | -1.39129778 | -4.37871707 |
| O | 1.25349657  | 1.39129778  | -4.37871707 |
| O | 1.52828954  | -1.52816933 | 1.52805830  |
| O | 1.25349657  | 1.39129778  | 4.37871707  |
| O | 1.25349657  | -1.39129778 | 4.37871707  |
| O | 3.45160300  | 0.00000000  | 3.34845509  |
| O | -1.52828954 | 1.52816933  | 1.52805830  |
| O | 0.00000000  | 3.34876429  | 3.45163972  |
| O | -1.39147761 | 4.37862640  | 1.25366363  |
| O | 1.39147761  | 4.37862640  | 1.25366363  |
| O | 4.37950063  | -1.25349599 | -1.39114940 |
| O | 5.86468671  | 0.00000000  | -2.89343691 |
| O | 4.37950063  | -1.25349599 | 1.39114940  |
| O | 5.86468671  | 0.00000000  | 2.89343691  |
| O | 2.89272546  | 5.86515829  | 0.00000000  |
| O | -1.52828954 | -1.52816933 | -1.52805830 |
| O | -1.25349657 | -1.39129778 | -4.37871707 |
| O | -1.25349657 | 1.39129778  | -4.37871707 |
| O | -3.45160300 | 0.00000000  | -3.34845509 |
| O | -3.34897760 | 3.45190493  | 0.00000000  |
| O | -4.37950063 | 1.25349599  | 1.39114940  |
| O | -4.37950063 | 1.25349599  | -1.39114940 |
| O | -2.89272546 | 5.86515829  | 0.00000000  |
| O | 0.00000000  | 2.89292665  | -5.86471980 |
| O | 3.34897760  | -3.45190493 | 0.00000000  |
| O | 0.00000000  | -3.34876429 | -3.45163972 |
| O | 1.39147761  | -4.37862640 | -1.25366363 |
| O | -1.39147761 | -4.37862640 | -1.25366363 |
| O | 0.00000000  | -2.89292665 | -5.86471980 |
| O | -1.52828954 | -1.52816933 | 1.52805830  |
| O | 1.39147761  | -4.37862640 | 1.25366363  |
| O | -1.39147761 | -4.37862640 | 1.25366363  |
| O | 0.00000000  | -3.34876429 | 3.45163972  |
| O | -1.25349657 | 1.39129778  | 4.37871707  |
| O | 0.00000000  | 2.89292665  | 5.86471980  |
| O | -1.25349657 | -1.39129778 | 4.37871707  |
| O | 0.00000000  | -2.89292665 | 5.86471980  |
| O | -3.45160300 | 0.00000000  | 3.34845509  |
| O | -4.37950063 | -1.25349599 | 1.39114940  |
| O | -4.37950063 | -1.25349599 | -1.39114940 |
| O | -3.34897760 | -3.45190493 | 0.00000000  |
| O | -5.86468671 | 0.00000000  | -2.89343691 |
| O | -5.86468671 | 0.00000000  | 2.89343691  |
| O | 2.89272546  | -5.86515829 | 0.00000000  |
| O | -2.89272546 | -5.86515829 | 0.00000000  |

**[Pt<sub>12</sub>O<sub>8</sub>(SO<sub>4</sub>)<sub>12</sub>]<sup>10-</sup> (D<sub>2h</sub>)**

Level: BP86/TZP/ZORA-scalar/COSMO-water

|    |             |             |             |
|----|-------------|-------------|-------------|
| Pt | 2.85452858  | 1.31349885  | 0.00000000  |
| Pt | 0.00000000  | 2.85399509  | -1.31353452 |
| Pt | 1.31372498  | 0.00000000  | -2.85475867 |
| Pt | 1.31372498  | 0.00000000  | 2.85475867  |
| Pt | 0.00000000  | 2.85399509  | 1.31353452  |
| Pt | -1.31372498 | 0.00000000  | -2.85475867 |
| Pt | -2.85452858 | 1.31349885  | 0.00000000  |
| Pt | 2.85452858  | -1.31349885 | 0.00000000  |
| Pt | 0.00000000  | -2.85399509 | -1.31353452 |
| Pt | 0.00000000  | -2.85399509 | 1.31353452  |
| Pt | -1.31372498 | 0.00000000  | 2.85475867  |
| Pt | -2.85452858 | -1.31349885 | 0.00000000  |
| S  | 4.64967769  | 0.00000000  | -2.31764704 |
| S  | 4.64967769  | 0.00000000  | 2.31764704  |
| S  | 2.31758565  | 4.64820990  | 0.00000000  |
| S  | -2.31758565 | 4.64820990  | 0.00000000  |
| S  | 0.00000000  | 2.31782809  | -4.64849412 |
| S  | 0.00000000  | -2.31782809 | -4.64849412 |
| S  | 0.00000000  | 2.31782809  | 4.64849412  |
| S  | 0.00000000  | -2.31782809 | 4.64849412  |
| S  | -4.64967769 | 0.00000000  | -2.31764704 |
| S  | -4.64967769 | 0.00000000  | 2.31764704  |
| S  | 2.31758565  | -4.64820990 | 0.00000000  |
| S  | -2.31758565 | -4.64820990 | 0.00000000  |
| O  | 1.51231922  | 1.51201573  | -1.51233090 |
| O  | 1.51231922  | 1.51201573  | 1.51233090  |
| O  | 4.45329603  | 1.25571312  | -1.43978508 |
| O  | 4.45329603  | 1.25571312  | 1.43978508  |
| O  | 3.43523869  | 3.63902350  | 0.00000000  |
| O  | -1.51231922 | 1.51201573  | -1.51233090 |
| O  | -1.44007999 | 4.45120429  | -1.25578411 |
| O  | 1.44007999  | 4.45120429  | -1.25578411 |
| O  | 0.00000000  | 3.43516289  | -3.63889902 |
| O  | 1.51231922  | -1.51201573 | -1.51233090 |
| O  | 3.63933155  | 0.00000000  | -3.43420664 |
| O  | 1.25582610  | -1.44040667 | -4.45178538 |
| O  | 1.25582610  | 1.44040667  | -4.45178538 |
| O  | 1.51231922  | -1.51201573 | 1.51233090  |
| O  | 1.25582610  | 1.44040667  | 4.45178538  |
| O  | 1.25582610  | -1.44040667 | 4.45178538  |
| O  | 3.63933155  | 0.00000000  | 3.43420664  |
| O  | -1.51231922 | 1.51201573  | 1.51233090  |
| O  | 0.00000000  | 3.43516289  | 3.63889902  |
| O  | -1.44007999 | 4.45120429  | 1.25578411  |
| O  | 1.44007999  | 4.45120429  | 1.25578411  |
| O  | 4.45329603  | -1.25571312 | -1.43978508 |
| O  | 6.03495624  | 0.00000000  | -2.83571073 |
| O  | 4.45329603  | -1.25571312 | 1.43978508  |
| O  | 6.03495624  | 0.00000000  | 2.83571073  |
| O  | 2.83412153  | 6.03381191  | 0.00000000  |
| O  | -1.51231922 | -1.51201573 | -1.51233090 |
| O  | -1.25582610 | -1.44040667 | -4.45178538 |
| O  | -1.25582610 | 1.44040667  | -4.45178538 |
| O  | -3.63933155 | 0.00000000  | -3.43420664 |
| O  | -3.43523869 | 3.63902350  | 0.00000000  |
| O  | -4.45329603 | 1.25571312  | 1.43978508  |
| O  | -4.45329603 | 1.25571312  | -1.43978508 |
| O  | -2.83412153 | 6.03381191  | 0.00000000  |
| O  | 0.00000000  | 2.83489671  | -6.03379532 |
| O  | 3.43523869  | -3.63902350 | 0.00000000  |
| O  | 0.00000000  | -3.43516289 | -3.63889902 |
| O  | 1.44007999  | -4.45120429 | -1.25578411 |

|   |             |             |             |
|---|-------------|-------------|-------------|
| O | -1.44007999 | -4.45120429 | -1.25578411 |
| O | 0.00000000  | -2.83489671 | -6.03379532 |
| O | -1.51231922 | -1.51201573 | 1.51233090  |
| O | 1.44007999  | -4.45120429 | 1.25578411  |
| O | -1.44007999 | -4.45120429 | 1.25578411  |
| O | 0.00000000  | -3.43516289 | 3.63889902  |
| O | -1.25582610 | 1.44040667  | 4.45178538  |
| O | 0.00000000  | 2.83489671  | 6.03379532  |
| O | -1.25582610 | -1.44040667 | 4.45178538  |
| O | 0.00000000  | -2.83489671 | 6.03379532  |
| O | -3.63933155 | 0.00000000  | 3.43420664  |
| O | -4.45329603 | -1.25571312 | 1.43978508  |
| O | -4.45329603 | -1.25571312 | -1.43978508 |
| O | -3.43523869 | -3.63902350 | 0.00000000  |
| O | -6.03495624 | 0.00000000  | -2.83571073 |
| O | -6.03495624 | 0.00000000  | 2.83571073  |
| O | 2.83412153  | -6.03381191 | 0.00000000  |
| O | -2.83412153 | -6.03381191 | 0.00000000  |

**[Pt<sub>12</sub>O<sub>8</sub>(SO<sub>4</sub>)<sub>12</sub>]<sup>16-</sup> (D<sub>2h</sub>)**

Level: BP86/TZP/ZORA-scalar/COSMO-water

80

|    |             |             |             |
|----|-------------|-------------|-------------|
| Pt | 2.80447998  | 1.38060921  | -0.00000000 |
| Pt | 0.00000000  | 2.80593285  | -1.37949478 |
| Pt | 1.38115116  | -0.00000000 | -2.80385467 |
| Pt | 1.38115116  | -0.00000000 | 2.80385467  |
| Pt | 0.00000000  | 2.80593285  | 1.37949478  |
| Pt | -1.38115116 | -0.00000000 | -2.80385467 |
| Pt | -2.80447998 | 1.38060921  | -0.00000000 |
| Pt | 2.80447998  | -1.38060921 | -0.00000000 |
| Pt | 0.00000000  | -2.80593285 | -1.37949478 |
| Pt | 0.00000000  | -2.80593285 | 1.37949478  |
| Pt | -1.38115116 | -0.00000000 | 2.80385467  |
| Pt | -2.80447998 | -1.38060921 | -0.00000000 |
| S  | 5.06469764  | -0.00000000 | -2.01382929 |
| S  | 5.06469764  | -0.00000000 | 2.01382928  |
| S  | 2.01481850  | 5.06926994  | -0.00000000 |
| S  | -2.01481850 | 5.06926994  | -0.00000000 |
| S  | 0.00000000  | 2.01554721  | -5.06469854 |
| S  | 0.00000000  | -2.01554721 | -5.06469854 |
| S  | 0.00000000  | 2.01554721  | 5.06469853  |
| S  | 0.00000000  | -2.01554721 | 5.06469853  |
| S  | -5.06469764 | -0.00000000 | -2.01382929 |
| S  | -5.06469764 | -0.00000000 | 2.01382928  |
| S  | 2.01481850  | -5.06926994 | -0.00000000 |
| S  | -2.01481850 | -5.06926994 | -0.00000000 |
| O  | 1.58769076  | 1.58943067  | -1.58813007 |
| O  | 1.58769076  | 1.58943067  | 1.58813007  |
| O  | 4.37983392  | 1.27458785  | -1.48696836 |
| O  | 4.37983392  | 1.27458785  | 1.48696836  |
| O  | 3.51342653  | 4.98534837  | -0.00000000 |
| O  | -1.58769076 | 1.58943067  | -1.58813007 |
| O  | -1.48355547 | 4.38908639  | -1.27543306 |
| O  | 1.48355547  | 4.38908639  | -1.27543306 |
| O  | 0.00000000  | 3.51406275  | -4.97809907 |
| O  | 1.58769076  | -1.58943067 | -1.58813007 |
| O  | 4.99069954  | -0.00000000 | -3.51296692 |
| O  | 1.27526435  | -1.48377070 | -4.38455959 |
| O  | 1.27526435  | 1.48377070  | -4.38455959 |
| O  | 1.58769076  | -1.58943067 | 1.58813007  |

|   |             |             |             |
|---|-------------|-------------|-------------|
| O | 1.27526435  | 1.48377070  | 4.38455958  |
| O | 1.27526435  | -1.48377070 | 4.38455958  |
| O | 4.99069954  | -0.00000000 | 3.51296691  |
| O | -1.58769076 | 1.58943067  | 1.58813007  |
| O | 0.00000000  | 3.51406275  | 4.97809907  |
| O | -1.48355547 | 4.38908639  | 1.27543305  |
| O | 1.48355547  | 4.38908639  | 1.27543305  |
| O | 4.37983392  | -1.27458785 | -1.48696836 |
| O | 6.49952977  | -0.00000000 | -1.57919657 |
| O | 4.37983392  | -1.27458785 | 1.48696836  |
| O | 6.49952977  | -0.00000000 | 1.57919657  |
| O | 1.58955253  | 6.50695052  | -0.00000000 |
| O | -1.58769076 | -1.58943067 | -1.58813007 |
| O | -1.27526435 | -1.48377070 | -4.38455959 |
| O | -1.27526435 | 1.48377070  | -4.38455959 |
| O | -4.99069954 | -0.00000000 | -3.51296692 |
| O | -3.51342653 | 4.98534837  | -0.00000000 |
| O | -4.37983392 | 1.27458785  | 1.48696836  |
| O | -4.37983392 | 1.27458785  | -1.48696836 |
| O | -1.58955253 | 6.50695052  | -0.00000000 |
| O | 0.00000000  | 1.59157491  | -6.50250900 |
| O | 3.51342653  | -4.98534837 | -0.00000000 |
| O | 0.00000000  | -3.51406275 | -4.97809907 |
| O | 1.48355547  | -4.38908639 | -1.27543306 |
| O | -1.48355547 | -4.38908639 | -1.27543306 |
| O | 0.00000000  | -1.59157491 | -6.50250900 |
| O | -1.58769076 | -1.58943067 | 1.58813007  |
| O | 1.48355547  | -4.38908639 | 1.27543305  |
| O | -1.48355547 | -4.38908639 | 1.27543305  |
| O | 0.00000000  | -3.51406275 | 4.97809907  |
| O | -1.27526435 | 1.48377070  | 4.38455958  |
| O | 0.00000000  | 1.59157491  | 6.50250900  |
| O | -1.27526435 | -1.48377070 | 4.38455958  |
| O | 0.00000000  | -1.59157491 | 6.50250900  |
| O | -4.99069954 | -0.00000000 | 3.51296691  |
| O | -4.37983392 | -1.27458785 | 1.48696836  |
| O | -4.37983392 | -1.27458785 | -1.48696836 |
| O | -3.51342653 | -4.98534837 | -0.00000000 |
| O | -6.49952977 | -0.00000000 | -1.57919657 |
| O | -6.49952977 | -0.00000000 | 1.57919657  |
| O | 1.58955253  | -6.50695052 | -0.00000000 |
| O | -1.58955253 | -6.50695052 | -0.00000000 |

**[K<sub>8</sub>Pt<sub>12</sub>O<sub>8</sub>(SO<sub>4</sub>)<sub>12</sub>]<sup>4+</sup> (D<sub>2h</sub>)**

Level: BP86/TZP/ZORA-scalar/COSMO-water

88

|    |             |             |             |
|----|-------------|-------------|-------------|
| K  | -3.54625102 | 3.55241712  | 3.46150631  |
| K  | -3.39854194 | 3.71654395  | -3.73697300 |
| K  | 3.54191638  | 3.54154888  | 3.52911593  |
| K  | 3.55706381  | 3.54110095  | -3.52233011 |
| K  | -3.50278515 | -3.53779341 | 3.50338855  |
| K  | 3.54624154  | -3.54573780 | 3.52980126  |
| K  | 3.54560212  | -3.54969347 | -3.53024086 |
| K  | -3.53896487 | -3.46808400 | -3.51671205 |
| Pt | 2.85160559  | 1.29192313  | 0.00132264  |
| Pt | -0.00229122 | 2.84414184  | -1.29011701 |
| Pt | 1.29586432  | -0.00272267 | -2.84645005 |
| Pt | 1.29745703  | -0.00315885 | 2.85422339  |
| Pt | 0.00478980  | 2.84758383  | 1.29807770  |
| Pt | -1.29335887 | -0.00253217 | -2.84728177 |



|    |             |             |             |
|----|-------------|-------------|-------------|
| Pt | -2.84790711 | 1.29028179  | 0.00666261  |
| Pt | 2.85216209  | -1.29576166 | 0.00339634  |
| Pt | 0.00247755  | -2.85102363 | -1.29186695 |
| Pt | 0.00262969  | -2.85256275 | 1.29659591  |
| Pt | -1.29073019 | -0.00302182 | 2.85402324  |
| Pt | -2.84828912 | -1.29687774 | 0.00284921  |
| S  | 4.55816272  | -0.00418500 | -2.29138376 |
| S  | 4.55744988  | 0.00010704  | 2.29580285  |
| S  | 2.29367844  | 4.55251411  | -0.00348568 |
| S  | -2.29485822 | 4.54918333  | 0.00872097  |
| S  | 0.00409812  | 2.28911061  | -4.55260162 |
| S  | 0.00138891  | -2.29612725 | -4.55362752 |
| S  | 0.00321967  | 2.29125164  | 4.55796328  |
| S  | 0.00501757  | -2.29801235 | 4.55800262  |
| S  | -4.55169259 | 0.00464072  | -2.28767400 |
| S  | -4.55281122 | -0.00768745 | 2.30112913  |
| S  | 2.29735284  | -4.55675100 | 0.00143076  |
| S  | -2.29213396 | -4.55787937 | 0.00038859  |
| O  | 1.53973747  | 1.53694593  | -1.53593778 |
| O  | 1.54218931  | 1.53476990  | 1.54238131  |
| O  | 4.36825152  | 1.26072096  | -1.40399878 |
| O  | 4.37161141  | 1.26131611  | 1.40226177  |
| O  | 3.35217745  | 3.45327181  | -0.01193559 |
| O  | -1.53738965 | 1.53179186  | -1.53240721 |
| O  | -1.41774155 | 4.35333736  | -1.26189430 |
| O  | 1.39483925  | 4.36816161  | -1.26034800 |
| O  | -0.00647193 | 3.34547947  | -3.45074208 |
| O  | 1.54125805  | -1.54076905 | -1.53613087 |
| O  | 3.45865349  | -0.00852181 | -3.34849188 |
| O  | 1.26346712  | -1.40391643 | -4.36694531 |
| O  | 1.26812142  | 1.40318150  | -4.36375777 |
| O  | 1.54172920  | -1.54165357 | 1.54232027  |
| O  | 1.26425425  | 1.39668629  | 4.37599019  |
| O  | 1.26736687  | -1.40684630 | 4.37283683  |
| O  | 3.45728318  | 0.00224481  | 3.35219571  |
| O  | -1.53607932 | 1.53743788  | 1.54506120  |
| O  | 0.01009937  | 3.34819650  | 3.45748864  |
| O  | -1.38741830 | 4.37565786  | 1.26252884  |
| O  | 1.41183266  | 4.36251131  | 1.26473890  |
| O  | 4.37280621  | -1.26444569 | -1.39698073 |
| O  | 5.87179652  | -0.00357615 | -2.89220431 |
| O  | 4.36969814  | -1.26407673 | 1.40680930  |
| O  | 5.86979381  | 0.00048661  | 2.89913665  |
| O  | 2.89646246  | 5.86511314  | -0.00587349 |
| O  | -1.53823083 | -1.54174934 | -1.53691354 |
| O  | -1.26167694 | -1.40488578 | -4.36833446 |
| O  | -1.25735496 | 1.39590887  | -4.37186827 |
| O  | -3.45115757 | -0.00649834 | -3.34495867 |
| O  | -3.35028912 | 3.44898538  | 0.03871248  |
| O  | -4.36467073 | 1.25663423  | 1.41300803  |
| O  | -4.36608711 | 1.26074857  | -1.39352450 |
| O  | -2.89871425 | 5.86138869  | 0.00618783  |
| O  | 0.00352607  | 2.89902605  | -5.86223910 |
| O  | 3.35349735  | -3.45652089 | 0.00492362  |
| O  | 0.00159683  | -3.35072423 | -3.45169121 |
| O  | 1.40640923  | -4.36918433 | -1.26135668 |
| O  | -1.39983284 | -4.37049795 | -1.26053903 |
| O  | 0.00374420  | -2.90087598 | -5.86501522 |
| O  | -1.53620350 | -1.54180980 | 1.54252575  |
| O  | 1.40404597  | -4.37335722 | 1.26299600  |
| O  | -1.40178632 | -4.36980247 | 1.26402945  |
| O  | 0.00366452  | -3.35416677 | 3.45660487  |

|   |             |             |             |
|---|-------------|-------------|-------------|
| O | -1.26040248 | 1.40279456  | 4.36915749  |
| O | 0.00229713  | 2.89610030  | 5.86961036  |
| O | -1.25745562 | -1.40661575 | 4.37314870  |
| O | 0.00572448  | -2.90473846 | 5.86885071  |
| O | -3.45214424 | -0.01152471 | 3.35711455  |
| O | -4.36691343 | -1.26767399 | 1.40593203  |
| O | -4.36849007 | -1.26256568 | -1.39752344 |
| O | -3.35038173 | -3.45915042 | 0.00136250  |
| O | -5.86246820 | 0.00259005  | -2.89451269 |
| O | -5.86562966 | -0.00876327 | 2.90361157  |
| O | 2.89904358  | -5.86988741 | -0.00057007 |
| O | -2.89183088 | -5.87188832 | 0.00068283  |

**[K<sub>8</sub>Pt<sub>12</sub>O<sub>8</sub>(SO<sub>4</sub>)<sub>12</sub>]<sup>2-</sup> (D<sub>2h</sub>)**

Level: BP86/TZP/ZORA-scalar/COSMO-water

88

|    |             |             |             |
|----|-------------|-------------|-------------|
| K  | -3.19113424 | 3.21712610  | 3.17985881  |
| K  | -3.19113424 | 3.21712610  | -3.17985881 |
| K  | 3.19113424  | 3.21712610  | 3.17985881  |
| K  | 3.19113424  | 3.21712610  | -3.17985881 |
| K  | -3.19113424 | -3.21712610 | 3.17985881  |
| K  | -3.19113424 | -3.21712610 | -3.17985881 |
| K  | 3.19113424  | -3.21712610 | 3.17985881  |
| K  | 3.19113424  | -3.21712610 | -3.17985881 |
| Pt | 2.86775096  | 1.31607703  | 0.00000000  |
| Pt | 0.00000000  | 2.86913342  | -1.31602495 |
| Pt | 1.31606938  | 0.00000000  | -2.86830319 |
| Pt | 1.31606938  | 0.00000000  | 2.86830319  |
| Pt | 0.00000000  | 2.86913342  | 1.31602495  |
| Pt | -1.31606938 | 0.00000000  | -2.86830319 |
| Pt | -2.86775096 | 1.31607703  | 0.00000000  |
| Pt | 2.86775096  | -1.31607703 | 0.00000000  |
| Pt | 0.00000000  | -2.86913342 | -1.31602495 |
| Pt | 0.00000000  | -2.86913342 | 1.31602495  |
| Pt | -1.31606938 | 0.00000000  | 2.86830319  |
| Pt | -2.86775096 | -1.31607703 | 0.00000000  |
| S  | 4.67125556  | 0.00000000  | -2.31399227 |
| S  | 4.67125556  | 0.00000000  | 2.31399227  |
| S  | 2.31237727  | 4.67641567  | 0.00000000  |
| S  | -2.31237727 | 4.67641567  | 0.00000000  |
| S  | 0.00000000  | 2.31331509  | -4.67326731 |
| S  | 0.00000000  | -2.31331509 | -4.67326731 |
| S  | 0.00000000  | 2.31331509  | 4.67326731  |
| S  | 0.00000000  | -2.31331509 | 4.67326731  |
| S  | -4.67125556 | 0.00000000  | -2.31399227 |
| S  | -4.67125556 | 0.00000000  | 2.31399227  |
| S  | 2.31237727  | -4.67641567 | 0.00000000  |
| S  | -2.31237727 | -4.67641567 | 0.00000000  |
| O  | 1.52914247  | 1.52978546  | -1.52950218 |
| O  | 1.52914247  | 1.52978546  | 1.52950218  |
| O  | 4.44608731  | 1.26324501  | -1.44108113 |
| O  | 4.44608731  | 1.26324501  | 1.44108113  |
| O  | 3.42856007  | 3.65737914  | 0.00000000  |
| O  | -1.52914247 | 1.52978546  | -1.52950218 |
| O  | -1.43945265 | 4.45028537  | -1.26257135 |
| O  | 1.43945265  | 4.45028537  | -1.26257135 |
| O  | 0.00000000  | 3.42983615  | -3.65436246 |
| O  | 1.52914247  | -1.52978546 | -1.52950218 |
| O  | 3.65294555  | 0.00000000  | -3.42993555 |
| O  | 1.26281173  | -1.44081832 | -4.44775455 |

|   |             |             |             |
|---|-------------|-------------|-------------|
| O | 1.26281173  | 1.44081832  | -4.44775455 |
| O | 1.52914247  | -1.52978546 | 1.52950218  |
| O | 1.26281173  | 1.44081832  | 4.44775455  |
| O | 1.26281173  | -1.44081832 | 4.44775455  |
| O | 3.65294555  | 0.00000000  | 3.42993555  |
| O | -1.52914247 | 1.52978546  | 1.52950218  |
| O | 0.00000000  | 3.42983615  | 3.65436246  |
| O | -1.43945265 | 4.45028537  | 1.26257135  |
| O | 1.43945265  | 4.45028537  | 1.26257135  |
| O | 4.44608731  | -1.26324501 | -1.44108113 |
| O | 6.04903929  | 0.00000000  | -2.81145795 |
| O | 4.44608731  | -1.26324501 | 1.44108113  |
| O | 6.04903929  | 0.00000000  | 2.81145795  |
| O | 2.81093042  | 6.05345105  | 0.00000000  |
| O | -1.52914247 | -1.52978546 | -1.52950218 |
| O | -1.26281173 | -1.44081832 | -4.44775455 |
| O | -1.26281173 | 1.44081832  | -4.44775455 |
| O | -3.65294555 | 0.00000000  | -3.42993555 |
| O | -3.42856007 | 3.65737914  | 0.00000000  |
| O | -4.44608731 | 1.26324501  | 1.44108113  |
| O | -4.44608731 | 1.26324501  | -1.44108113 |
| O | -2.81093042 | 6.05345105  | 0.00000000  |
| O | 0.00000000  | 2.81309629  | -6.04999803 |
| O | 3.42856007  | -3.65737914 | 0.00000000  |
| O | 0.00000000  | -3.42983615 | -3.65436246 |
| O | 1.43945265  | -4.45028537 | -1.26257135 |
| O | -1.43945265 | -4.45028537 | -1.26257135 |
| O | 0.00000000  | -2.81309629 | -6.04999803 |
| O | -1.52914247 | -1.52978546 | 1.52950218  |
| O | 1.43945265  | -4.45028537 | 1.26257135  |
| O | -1.43945265 | -4.45028537 | 1.26257135  |
| O | 0.00000000  | -3.42983615 | 3.65436246  |
| O | -1.26281173 | 1.44081832  | 4.44775455  |
| O | 0.00000000  | 2.81309629  | 6.04999803  |
| O | -1.26281173 | -1.44081832 | 4.44775455  |
| O | 0.00000000  | -2.81309629 | 6.04999803  |
| O | -3.65294555 | 0.00000000  | 3.42993555  |
| O | -4.44608731 | -1.26324501 | 1.44108113  |
| O | -4.44608731 | -1.26324501 | -1.44108113 |
| O | -3.42856007 | -3.65737914 | 0.00000000  |
| O | -6.04903929 | 0.00000000  | -2.81145795 |
| O | -6.04903929 | 0.00000000  | 2.81145795  |
| O | 2.81093042  | -6.05345105 | 0.00000000  |
| O | -2.81093042 | -6.05345105 | 0.00000000  |

**[K<sub>8</sub>Pt<sub>12</sub>O<sub>8</sub>(SO<sub>4</sub>)<sub>12</sub>]<sup>8-</sup> (D<sub>2h</sub>)**

Level: BP86/TZP/ZORA-scalar/COSMO-water

88

|    |             |             |             |
|----|-------------|-------------|-------------|
| K  | -3.10091149 | 3.10743490  | -3.09690293 |
| K  | -3.10091149 | 3.10743490  | 3.09690293  |
| K  | -3.10091149 | -3.10743490 | 3.09690293  |
| K  | -3.10091149 | -3.10743490 | -3.09690293 |
| K  | 3.10091149  | 3.10743490  | 3.09690293  |
| K  | 3.10091149  | 3.10743490  | -3.09690293 |
| K  | 3.10091149  | -3.10743490 | 3.09690293  |
| K  | 3.10091149  | -3.10743490 | -3.09690293 |
| Pt | 2.81985257  | 1.37301828  | 0.00000000  |
| Pt | 0.00000000  | 2.82546913  | -1.37267598 |
| Pt | 1.37192692  | 0.00000000  | -2.82248169 |
| Pt | 1.37192692  | 0.00000000  | 2.82248169  |

|    |             |             |             |
|----|-------------|-------------|-------------|
| Pt | 0.00000000  | 2.82546913  | 1.37267598  |
| Pt | -1.37192692 | 0.00000000  | -2.82248169 |
| Pt | -2.81985257 | 1.37301828  | 0.00000000  |
| Pt | 2.81985257  | -1.37301828 | 0.00000000  |
| Pt | 0.00000000  | -2.82546913 | -1.37267598 |
| Pt | 0.00000000  | -2.82546913 | 1.37267598  |
| Pt | -1.37192692 | 0.00000000  | 2.82248169  |
| Pt | -2.81985257 | -1.37301828 | 0.00000000  |
| S  | 5.04130650  | 0.00000000  | -2.05168029 |
| S  | 5.04130650  | 0.00000000  | 2.05168029  |
| S  | 2.05689213  | 5.04335882  | 0.00000000  |
| S  | -2.05689213 | 5.04335882  | 0.00000000  |
| S  | 0.00000000  | 2.05171140  | -5.04507105 |
| S  | 0.00000000  | -2.05171140 | -5.04507105 |
| S  | 0.00000000  | 2.05171140  | 5.04507105  |
| S  | 0.00000000  | -2.05171140 | 5.04507105  |
| S  | -5.04130650 | 0.00000000  | -2.05168029 |
| S  | -5.04130650 | 0.00000000  | 2.05168029  |
| S  | 2.05689213  | -5.04335882 | 0.00000000  |
| S  | -2.05689213 | -5.04335882 | 0.00000000  |
| O  | 1.57671545  | 1.57936949  | -1.57835025 |
| O  | 1.57671545  | 1.57936949  | 1.57835025  |
| O  | 4.37238928  | 1.28129281  | -1.48247982 |
| O  | 4.37238928  | 1.28129281  | 1.48247982  |
| O  | 3.53602608  | 4.85320475  | 0.00000000  |
| O  | -1.57671545 | 1.57936949  | -1.57835025 |
| O  | -1.47392394 | 4.38719079  | -1.28158024 |
| O  | 1.47392394  | 4.38719079  | -1.28158024 |
| O  | 0.00000000  | 3.53384858  | -4.88351984 |
| O  | 1.57671545  | -1.57936949 | -1.57835025 |
| O  | 4.87627623  | 0.00000000  | -3.53383028 |
| O  | 1.28143580  | -1.48483594 | -4.37427846 |
| O  | 1.28143580  | 1.48483594  | -4.37427846 |
| O  | 1.57671545  | -1.57936949 | 1.57835025  |
| O  | 1.28143580  | 1.48483594  | 4.37427846  |
| O  | 1.28143580  | -1.48483594 | 4.37427846  |
| O  | 4.87627623  | 0.00000000  | 3.53383028  |
| O  | -1.57671545 | 1.57936949  | 1.57835025  |
| O  | 0.00000000  | 3.53384858  | 4.88351984  |
| O  | -1.47392394 | 4.38719079  | 1.28158024  |
| O  | 1.47392394  | 4.38719079  | 1.28158024  |
| O  | 4.37238928  | -1.28129281 | -1.48247982 |
| O  | 6.47722787  | 0.00000000  | -1.65773547 |
| O  | 4.37238928  | -1.28129281 | 1.48247982  |
| O  | 6.47722787  | 0.00000000  | 1.65773547  |
| O  | 1.68749528  | 6.48622740  | 0.00000000  |
| O  | -1.57671545 | -1.57936949 | -1.57835025 |
| O  | -1.28143580 | -1.48483594 | -4.37427846 |
| O  | -1.28143580 | 1.48483594  | -4.37427846 |
| O  | -4.87627623 | 0.00000000  | -3.53383028 |
| O  | -3.53602608 | 4.85320475  | 0.00000000  |
| O  | -4.37238928 | 1.28129281  | 1.48247982  |
| O  | -4.37238928 | 1.28129281  | -1.48247982 |
| O  | -1.68749528 | 6.48622740  | 0.00000000  |
| O  | 0.00000000  | 1.65290273  | -6.47981430 |
| O  | 3.53602608  | -4.85320475 | 0.00000000  |
| O  | 0.00000000  | -3.53384858 | -4.88351984 |
| O  | 1.47392394  | -4.38719079 | -1.28158024 |
| O  | -1.47392394 | -4.38719079 | -1.28158024 |
| O  | 0.00000000  | -1.65290273 | -6.47981430 |
| O  | -1.57671545 | -1.57936949 | 1.57835025  |
| O  | 1.47392394  | -4.38719079 | 1.28158024  |

|   |             |             |             |
|---|-------------|-------------|-------------|
| O | -1.47392394 | -4.38719079 | 1.28158024  |
| O | 0.00000000  | -3.53384858 | 4.88351984  |
| O | -1.28143580 | 1.48483594  | 4.37427846  |
| O | 0.00000000  | 1.65290273  | 6.47981430  |
| O | -1.28143580 | -1.48483594 | 4.37427846  |
| O | 0.00000000  | -1.65290273 | 6.47981430  |
| O | -4.87627623 | 0.00000000  | 3.53383028  |
| O | -4.37238928 | -1.28129281 | 1.48247982  |
| O | -4.37238928 | -1.28129281 | -1.48247982 |
| O | -3.53602608 | -4.85320475 | 0.00000000  |
| O | -6.47722787 | 0.00000000  | -1.65773547 |
| O | -6.47722787 | 0.00000000  | 1.65773547  |
| O | 1.68749528  | -6.48622740 | 0.00000000  |
| O | -1.68749528 | -6.48622740 | 0.00000000  |

**[BePt<sub>12</sub>O<sub>8</sub>(SO<sub>4</sub>)<sub>12</sub>]<sup>2-</sup> (D<sub>2h</sub>)**

Level: BP86/TZP/ZORA-scalar/COSMO-water

81

|    |             |             |             |
|----|-------------|-------------|-------------|
| Be | 0.00000000  | 0.00000000  | 0.00000000  |
| Pt | 2.88011983  | 1.29318009  | 0.00000000  |
| Pt | 0.00000000  | 2.87925319  | -1.29311469 |
| Pt | 1.29309114  | 0.00000000  | -2.87940051 |
| Pt | 1.29309114  | 0.00000000  | 2.87940051  |
| Pt | 0.00000000  | 2.87925319  | 1.29311469  |
| Pt | -1.29309114 | 0.00000000  | -2.87940051 |
| Pt | -2.88011983 | 1.29318009  | 0.00000000  |
| Pt | 2.88011983  | -1.29318009 | 0.00000000  |
| Pt | 0.00000000  | -2.87925319 | -1.29311469 |
| Pt | 0.00000000  | -2.87925319 | 1.29311469  |
| Pt | -1.29309114 | 0.00000000  | 2.87940051  |
| Pt | -2.88011983 | -1.29318009 | 0.00000000  |
| S  | 4.55886011  | 0.00000000  | -2.26589816 |
| S  | 4.55886011  | 0.00000000  | 2.26589816  |
| S  | 2.26548704  | 4.55865941  | 0.00000000  |
| S  | -2.26548704 | 4.55865941  | 0.00000000  |
| S  | 0.00000000  | 2.26561619  | -4.55878085 |
| S  | 0.00000000  | -2.26561619 | -4.55878085 |
| S  | 0.00000000  | 2.26561619  | 4.55878085  |
| S  | 0.00000000  | -2.26561619 | 4.55878085  |
| S  | -4.55886011 | 0.00000000  | -2.26589816 |
| S  | -4.55886011 | 0.00000000  | 2.26589816  |
| S  | 2.26548704  | -4.55865941 | 0.00000000  |
| S  | -2.26548704 | -4.55865941 | 0.00000000  |
| O  | 1.25168374  | 1.25147058  | -1.25139617 |
| O  | 1.25168374  | 1.25147058  | 1.25139617  |
| O  | 4.41490927  | 1.26299625  | -1.35843205 |
| O  | 4.41490927  | 1.26299625  | 1.35843205  |
| O  | 3.29493267  | 3.44649546  | 0.00000000  |
| O  | -1.25168374 | 1.25147058  | -1.25139617 |
| O  | -1.35893050 | 4.41329491  | -1.26331711 |
| O  | 1.35893050  | 4.41329491  | -1.26331711 |
| O  | 0.00000000  | 3.29419410  | -3.44591575 |
| O  | 1.25168374  | -1.25147058 | -1.25139617 |
| O  | 3.44563465  | 0.00000000  | -3.29380502 |
| O  | 1.26326365  | -1.35882725 | -4.41362175 |
| O  | 1.26326365  | 1.35882725  | -4.41362175 |
| O  | 1.25168374  | -1.25147058 | 1.25139617  |
| O  | 1.26326365  | 1.35882725  | 4.41362175  |
| O  | 1.26326365  | -1.35882725 | 4.41362175  |
| O  | 3.44563465  | 0.00000000  | 3.29380502  |

|   |             |             |             |
|---|-------------|-------------|-------------|
| O | -1.25168374 | 1.25147058  | 1.25139617  |
| O | 0.00000000  | 3.29419410  | 3.44591575  |
| O | -1.35893050 | 4.41329491  | 1.26331711  |
| O | 1.35893050  | 4.41329491  | 1.26331711  |
| O | 4.41490927  | -1.26299625 | -1.35843205 |
| O | 5.86803044  | 0.00000000  | -2.88260571 |
| O | 4.41490927  | -1.26299625 | 1.35843205  |
| O | 5.86803044  | 0.00000000  | 2.88260571  |
| O | 2.88043177  | 5.86861171  | 0.00000000  |
| O | -1.25168374 | -1.25147058 | -1.25139617 |
| O | -1.26326365 | -1.35882725 | -4.41362175 |
| O | -1.26326365 | 1.35882725  | -4.41362175 |
| O | -3.44563465 | 0.00000000  | -3.29380502 |
| O | -3.29493267 | 3.44649546  | 0.00000000  |
| O | -4.41490927 | 1.26299625  | 1.35843205  |
| O | -4.41490927 | 1.26299625  | -1.35843205 |
| O | -2.88043177 | 5.86861171  | 0.00000000  |
| O | 0.00000000  | 2.88107604  | -5.86834515 |
| O | 3.29493267  | -3.44649546 | 0.00000000  |
| O | 0.00000000  | -3.29419410 | -3.44591575 |
| O | 1.35893050  | -4.41329491 | -1.26331711 |
| O | -1.35893050 | -4.41329491 | -1.26331711 |
| O | 0.00000000  | -2.88107604 | -5.86834515 |
| O | -1.25168374 | -1.25147058 | 1.25139617  |
| O | 1.35893050  | -4.41329491 | 1.26331711  |
| O | -1.35893050 | -4.41329491 | 1.26331711  |
| O | 0.00000000  | -3.29419410 | 3.44591575  |
| O | -1.26326365 | 1.35882725  | 4.41362175  |
| O | 0.00000000  | 2.88107604  | 5.86834515  |
| O | -1.26326365 | -1.35882725 | 4.41362175  |
| O | 0.00000000  | -2.88107604 | 5.86834515  |
| O | -3.44563465 | 0.00000000  | 3.29380502  |
| O | -4.41490927 | -1.26299625 | 1.35843205  |
| O | -4.41490927 | -1.26299625 | -1.35843205 |
| O | -3.29493267 | -3.44649546 | 0.00000000  |
| O | -5.86803044 | 0.00000000  | -2.88260571 |
| O | -5.86803044 | 0.00000000  | 2.88260571  |
| O | 2.88043177  | -5.86861171 | 0.00000000  |
| O | -2.88043177 | -5.86861171 | 0.00000000  |

**[NaC Pt<sub>12</sub>O<sub>8</sub>(SO<sub>4</sub>)<sub>12</sub>]<sup>3-</sup> (D<sub>2h</sub>)**

Level: BP86/TZP/ZORA-scalar/COSMO-water

81

|    |             |             |             |
|----|-------------|-------------|-------------|
| Na | 0.00000000  | 0.00000000  | 0.00000000  |
| Pt | -2.88490344 | -1.29867107 | 0.00000000  |
| Pt | -1.29852092 | 0.00000000  | -2.88380704 |
| Pt | -2.88490344 | 1.29867107  | 0.00000000  |
| Pt | 2.88490344  | -1.29867107 | 0.00000000  |
| Pt | 0.00000000  | -2.88446212 | -1.29860796 |
| Pt | 0.00000000  | -2.88446212 | 1.29860796  |
| Pt | -1.29852092 | 0.00000000  | 2.88380704  |
| Pt | 0.00000000  | 2.88446212  | -1.29860796 |
| Pt | 1.29852092  | 0.00000000  | -2.88380704 |
| Pt | 1.29852092  | 0.00000000  | 2.88380704  |
| Pt | 0.00000000  | 2.88446212  | 1.29860796  |
| Pt | 2.88490344  | 1.29867107  | 0.00000000  |
| S  | 0.00000000  | -2.28981720 | 4.55402030  |
| S  | -4.55406786 | 0.00000000  | -2.28983855 |
| S  | -4.55406786 | 0.00000000  | 2.28983855  |
| S  | 2.28965738  | -4.55407353 | 0.00000000  |
| S  | -2.28965738 | -4.55407353 | 0.00000000  |
| S  | -2.28965738 | 4.55407353  | 0.00000000  |

|   |             |             |             |
|---|-------------|-------------|-------------|
| S | 0.00000000  | 2.28981720  | -4.55402030 |
| S | 0.00000000  | -2.28981720 | -4.55402030 |
| S | 0.00000000  | 2.28981720  | 4.55402030  |
| S | 4.55406786  | 0.00000000  | -2.28983855 |
| S | 4.55406786  | 0.00000000  | 2.28983855  |
| S | 2.28965738  | 4.55407353  | 0.00000000  |
| O | 1.44248778  | 1.44245193  | -1.44206423 |
| O | 1.44248778  | 1.44245193  | 1.44206423  |
| O | 4.40424523  | 1.25750791  | -1.38260022 |
| O | 4.40424523  | 1.25750791  | 1.38260022  |
| O | 3.33544746  | 3.45646402  | 0.00000000  |
| O | -1.44248778 | 1.44245193  | -1.44206423 |
| O | -1.38303821 | 4.40321098  | -1.25789025 |
| O | 1.38303821  | 4.40321098  | -1.25789025 |
| O | 0.00000000  | 3.33556952  | -3.45644833 |
| O | 1.44248778  | -1.44245193 | -1.44206423 |
| O | 3.45575139  | 0.00000000  | -3.33489055 |
| O | 1.25768555  | -1.38326955 | -4.40241182 |
| O | 1.25768555  | 1.38326955  | -4.40241182 |
| O | 1.44248778  | -1.44245193 | 1.44206423  |
| O | 1.25768555  | 1.38326955  | 4.40241182  |
| O | 1.25768555  | -1.38326955 | 4.40241182  |
| O | 3.45575139  | 0.00000000  | 3.33489055  |
| O | -1.44248778 | 1.44245193  | 1.44206423  |
| O | 0.00000000  | 3.33556952  | 3.45644833  |
| O | -1.38303821 | 4.40321098  | 1.25789025  |
| O | 1.38303821  | 4.40321098  | 1.25789025  |
| O | 4.40424523  | -1.25750791 | -1.38260022 |
| O | 5.87106681  | 0.00000000  | -2.89633562 |
| O | 4.40424523  | -1.25750791 | 1.38260022  |
| O | 5.87106681  | 0.00000000  | 2.89633562  |
| O | 2.89455018  | 5.87179327  | 0.00000000  |
| O | -1.44248778 | -1.44245193 | -1.44206423 |
| O | -1.25768555 | -1.38326955 | -4.40241182 |
| O | -1.25768555 | 1.38326955  | -4.40241182 |
| O | -3.45575139 | 0.00000000  | -3.33489055 |
| O | -3.33544746 | 3.45646402  | 0.00000000  |
| O | -4.40424523 | 1.25750791  | 1.38260022  |
| O | -4.40424523 | 1.25750791  | -1.38260022 |
| O | -2.89455018 | 5.87179327  | 0.00000000  |
| O | 0.00000000  | 2.89416019  | -5.87191707 |
| O | 3.33544746  | -3.45646402 | 0.00000000  |
| O | 0.00000000  | -3.33556952 | -3.45644833 |
| O | 1.38303821  | -4.40321098 | -1.25789025 |
| O | -1.38303821 | -4.40321098 | -1.25789025 |
| O | 0.00000000  | -2.89416019 | -5.87191707 |
| O | -1.44248778 | -1.44245193 | 1.44206423  |
| O | 1.38303821  | -4.40321098 | 1.25789025  |
| O | -1.38303821 | -4.40321098 | 1.25789025  |
| O | 0.00000000  | -3.33556952 | 3.45644833  |
| O | -1.25768555 | 1.38326955  | 4.40241182  |
| O | 0.00000000  | 2.89416019  | 5.87191707  |
| O | -1.25768555 | -1.38326955 | 4.40241182  |
| O | 0.00000000  | -2.89416019 | 5.87191707  |
| O | -3.45575139 | 0.00000000  | 3.33489055  |
| O | -4.40424523 | -1.25750791 | 1.38260022  |
| O | -4.40424523 | -1.25750791 | -1.38260022 |
| O | -3.33544746 | -3.45646402 | 0.00000000  |
| O | -5.87106681 | 0.00000000  | -2.89633562 |
| O | -5.87106681 | 0.00000000  | 2.89633562  |
| O | 2.89455018  | -5.87179327 | 0.00000000  |
| O | -2.89455018 | -5.87179327 | 0.00000000  |

**[Cs<sub>3</sub>Pt<sub>12</sub>O<sub>8</sub>(SO<sub>4</sub>)<sub>12</sub>]<sup>3-</sup> (D<sub>2h</sub>)**

Level: BP86/TZP/ZORA-scalar/COSMO-water

81

|    |             |             |             |
|----|-------------|-------------|-------------|
| Cs | 0.00000000  | 0.00000000  | 0.00000000  |
| Pt | 2.90844559  | 1.32228343  | 0.00000000  |
| Pt | 0.00000000  | 2.90794459  | -1.32233883 |
| Pt | 1.32214369  | 0.00000000  | -2.90768262 |
| Pt | 1.32214369  | 0.00000000  | 2.90768262  |
| Pt | 0.00000000  | 2.90794459  | 1.32233883  |
| Pt | -1.32214369 | 0.00000000  | -2.90768262 |
| Pt | -2.90844559 | 1.32228343  | 0.00000000  |
| Pt | 2.90844559  | -1.32228343 | 0.00000000  |
| Pt | 0.00000000  | -2.90794459 | -1.32233883 |
| Pt | 0.00000000  | -2.90794459 | 1.32233883  |
| Pt | -1.32214369 | 0.00000000  | 2.90768262  |
| Pt | -2.90844559 | -1.32228343 | 0.00000000  |
| S  | 4.56722407  | 0.00000000  | -2.30790688 |
| S  | 4.56722407  | 0.00000000  | 2.30790688  |
| S  | 2.30753993  | 4.56715903  | 0.00000000  |
| S  | -2.30753993 | 4.56715903  | 0.00000000  |
| S  | 0.00000000  | 2.30763525  | -4.56726171 |
| S  | 0.00000000  | -2.30763525 | -4.56726171 |
| S  | 0.00000000  | 2.30763525  | 4.56726171  |
| S  | 0.00000000  | -2.30763525 | 4.56726171  |
| S  | -4.56722407 | 0.00000000  | -2.30790688 |
| S  | -4.56722407 | 0.00000000  | 2.30790688  |
| S  | 2.30753993  | -4.56715903 | 0.00000000  |
| S  | -2.30753993 | -4.56715903 | 0.00000000  |
| O  | 1.60869636  | 1.60861242  | -1.60843486 |
| O  | 1.60869636  | 1.60861242  | 1.60843486  |
| O  | 4.41589963  | 1.25588353  | -1.40138116 |
| O  | 4.41589963  | 1.25588353  | 1.40138116  |
| O  | 3.36424190  | 3.47692891  | 0.00000000  |
| O  | -1.60869636 | 1.60861242  | -1.60843486 |
| O  | -1.40188255 | 4.41477777  | -1.25636007 |
| O  | 1.40188255  | 4.41477777  | -1.25636007 |
| O  | 0.00000000  | 3.36419996  | -3.47685556 |
| O  | 1.60869636  | -1.60861242 | -1.60843486 |
| O  | 3.47599038  | 0.00000000  | -3.36335704 |
| O  | 1.25615258  | -1.40192940 | -4.41438092 |
| O  | 1.25615258  | 1.40192940  | -4.41438092 |
| O  | 1.60869636  | -1.60861242 | 1.60843486  |
| O  | 1.25615258  | 1.40192940  | 4.41438092  |
| O  | 1.25615258  | -1.40192940 | 4.41438092  |
| O  | 3.47599038  | 0.00000000  | 3.36335704  |
| O  | -1.60869636 | 1.60861242  | 1.60843486  |
| O  | 0.00000000  | 3.36419996  | 3.47685556  |
| O  | -1.40188255 | 4.41477777  | 1.25636007  |
| O  | 1.40188255  | 4.41477777  | 1.25636007  |
| O  | 4.41589963  | -1.25588353 | -1.40138116 |
| O  | 5.88509863  | 0.00000000  | -2.91276957 |
| O  | 4.41589963  | -1.25588353 | 1.40138116  |
| O  | 5.88509863  | 0.00000000  | 2.91276957  |
| O  | 2.91045817  | 5.88561915  | 0.00000000  |
| O  | -1.60869636 | -1.60861242 | -1.60843486 |
| O  | -1.25615258 | -1.40192940 | -4.41438092 |
| O  | -1.25615258 | 1.40192940  | -4.41438092 |
| O  | -3.47599038 | 0.00000000  | -3.36335704 |
| O  | -3.36424190 | 3.47692891  | 0.00000000  |



|   |             |             |             |
|---|-------------|-------------|-------------|
| O | -4.41589963 | 1.25588353  | 1.40138116  |
| O | -4.41589963 | 1.25588353  | -1.40138116 |
| O | -2.91045817 | 5.88561915  | 0.00000000  |
| O | 0.00000000  | 2.91080710  | -5.88583816 |
| O | 3.36424190  | -3.47692891 | 0.00000000  |
| O | 0.00000000  | -3.36419996 | -3.47685556 |
| O | 1.40188255  | -4.41477777 | -1.25636007 |
| O | -1.40188255 | -4.41477777 | -1.25636007 |
| O | 0.00000000  | -2.91080710 | -5.88583816 |
| O | -1.60869636 | -1.60861242 | 1.60843486  |
| O | 1.40188255  | -4.41477777 | 1.25636007  |
| O | -1.40188255 | -4.41477777 | 1.25636007  |
| O | 0.00000000  | -3.36419996 | 3.47685556  |
| O | -1.25615258 | 1.40192940  | 4.41438092  |
| O | 0.00000000  | 2.91080710  | 5.88583816  |
| O | -1.25615258 | -1.40192940 | 4.41438092  |
| O | 0.00000000  | -2.91080710 | 5.88583816  |
| O | -3.47599038 | 0.00000000  | 3.36335704  |
| O | -4.41589963 | -1.25588353 | 1.40138116  |
| O | -4.41589963 | -1.25588353 | -1.40138116 |
| O | -3.36424190 | -3.47692891 | 0.00000000  |
| O | -5.88509863 | 0.00000000  | -2.91276957 |
| O | -5.88509863 | 0.00000000  | 2.91276957  |
| O | 2.91045817  | -5.88561915 | 0.00000000  |
| O | -2.91045817 | -5.88561915 | 0.00000000  |

**[Pt<sub>12</sub>O<sub>8</sub>(PO<sub>4</sub>)<sub>12</sub>]<sup>16-</sup> (D<sub>2h</sub>)**

Level: BP86/TZP/ZORA-scalar/COSMO-water

80

|    |             |             |             |
|----|-------------|-------------|-------------|
| Pt | 2.86795083  | 1.30470872  | 0.00000000  |
| Pt | 0.00000000  | 2.86724035  | -1.30424852 |
| Pt | 1.30461004  | 0.00000000  | -2.86561241 |
| Pt | 1.30461004  | 0.00000000  | 2.86561241  |
| Pt | 0.00000000  | 2.86724035  | 1.30424852  |
| Pt | -1.30461004 | 0.00000000  | -2.86561241 |
| Pt | -2.86795083 | 1.30470872  | 0.00000000  |
| Pt | 2.86795083  | -1.30470872 | 0.00000000  |
| Pt | 0.00000000  | -2.86724035 | -1.30424852 |
| Pt | 0.00000000  | -2.86724035 | 1.30424852  |
| Pt | -1.30461004 | 0.00000000  | 2.86561241  |
| Pt | -2.86795083 | -1.30470872 | 0.00000000  |
| P  | 4.56376602  | 0.00000000  | -2.30347395 |
| P  | 4.56376602  | 0.00000000  | 2.30347395  |
| P  | 2.30291761  | 4.56311678  | 0.00000000  |
| P  | -2.30291761 | 4.56311678  | 0.00000000  |
| P  | 0.00000000  | 2.30431755  | -4.56263397 |
| P  | 0.00000000  | -2.30431755 | -4.56263397 |
| P  | 0.00000000  | 2.30431755  | 4.56263397  |
| P  | 0.00000000  | -2.30431755 | 4.56263397  |
| P  | -4.56376602 | 0.00000000  | -2.30347395 |
| P  | -4.56376602 | 0.00000000  | 2.30347395  |
| P  | 2.30291761  | -4.56311678 | 0.00000000  |
| P  | -2.30291761 | -4.56311678 | 0.00000000  |
| O  | 1.53159465  | 1.53143284  | -1.53062278 |
| O  | 1.53159465  | 1.53143284  | 1.53062278  |
| O  | 4.40409661  | 1.29122146  | -1.38679473 |
| O  | 4.40409661  | 1.29122146  | 1.38679473  |
| O  | 3.41239670  | 3.45892692  | 0.00000000  |
| O  | -1.53159465 | 1.53143284  | -1.53062278 |
| O  | -1.38498763 | 4.40409175  | -1.29068115 |

|   |             |             |             |
|---|-------------|-------------|-------------|
| O | 1.38498763  | 4.40409175  | -1.29068115 |
| O | 0.00000000  | 3.41623462  | -3.46002699 |
| O | 1.53159465  | -1.53143284 | -1.53062278 |
| O | 3.46062795  | 0.00000000  | -3.41456238 |
| O | 1.29064379  | -1.38724052 | -4.40114136 |
| O | 1.29064379  | 1.38724052  | -4.40114136 |
| O | 1.53159465  | -1.53143284 | 1.53062278  |
| O | 1.29064379  | 1.38724052  | 4.40114136  |
| O | 1.29064379  | -1.38724052 | 4.40114136  |
| O | 3.46062795  | 0.00000000  | 3.41456238  |
| O | -1.53159465 | 1.53143284  | 1.53062278  |
| O | 0.00000000  | 3.41623462  | 3.46002699  |
| O | -1.38498763 | 4.40409175  | 1.29068115  |
| O | 1.38498763  | 4.40409175  | 1.29068115  |
| O | 4.40409661  | -1.29122146 | -1.38679473 |
| O | 5.96096585  | 0.00000000  | -2.93011575 |
| O | 4.40409661  | -1.29122146 | 1.38679473  |
| O | 5.96096585  | 0.00000000  | 2.93011575  |
| O | 2.92932533  | 5.96004005  | 0.00000000  |
| O | -1.53159465 | -1.53143284 | -1.53062278 |
| O | -1.29064379 | -1.38724052 | -4.40114136 |
| O | -1.29064379 | 1.38724052  | -4.40114136 |
| O | -3.46062795 | 0.00000000  | -3.41456238 |
| O | -3.41239670 | 3.45892692  | 0.00000000  |
| O | -4.40409661 | 1.29122146  | 1.38679473  |
| O | -4.40409661 | 1.29122146  | -1.38679473 |
| O | -2.92932533 | 5.96004005  | 0.00000000  |
| O | 0.00000000  | 2.92873708  | -5.96055470 |
| O | 3.41239670  | -3.45892692 | 0.00000000  |
| O | 0.00000000  | -3.41623462 | -3.46002699 |
| O | 1.38498763  | -4.40409175 | -1.29068115 |
| O | -1.38498763 | -4.40409175 | -1.29068115 |
| O | 0.00000000  | -2.92873708 | -5.96055470 |
| O | -1.53159465 | -1.53143284 | 1.53062278  |
| O | 1.38498763  | -4.40409175 | 1.29068115  |
| O | -1.38498763 | -4.40409175 | 1.29068115  |
| O | 0.00000000  | -3.41623462 | 3.46002699  |
| O | -1.29064379 | 1.38724052  | 4.40114136  |
| O | 0.00000000  | 2.92873708  | 5.96055470  |
| O | -1.29064379 | -1.38724052 | 4.40114136  |
| O | 0.00000000  | -2.92873708 | 5.96055470  |
| O | -3.46062795 | 0.00000000  | 3.41456238  |
| O | -4.40409661 | -1.29122146 | 1.38679473  |
| O | -4.40409661 | -1.29122146 | -1.38679473 |
| O | -3.41239670 | -3.45892692 | 0.00000000  |
| O | -5.96096585 | 0.00000000  | -2.93011575 |
| O | -5.96096585 | 0.00000000  | 2.93011575  |
| O | 2.92932533  | -5.96004005 | 0.00000000  |
| O | -2.92932533 | -5.96004005 | 0.00000000  |

**[Pt<sub>12</sub>O<sub>8</sub>(SO<sub>4</sub>)<sub>8</sub>]<sup>8-</sup> (D<sub>2h</sub>)**

Level: BP86/TZP/ZORA-scalar/COSMO-water

60

|    |             |             |             |
|----|-------------|-------------|-------------|
| Pt | 0.00000000  | -2.36052115 | 2.36052115  |
| Pt | 2.36052115  | 0.00000000  | 2.36052115  |
| Pt | 2.36052115  | -2.36052115 | -0.00000000 |
| Pt | -2.36052115 | 0.00000000  | 2.36052115  |
| Pt | -2.36052115 | -2.36052115 | -0.00000000 |
| Pt | 0.00000000  | 2.36052115  | 2.36052115  |
| Pt | 2.36052115  | 2.36052115  | -0.00000000 |
| Pt | 0.00000000  | -2.36052115 | -2.36052115 |

|    |             |             |             |
|----|-------------|-------------|-------------|
| Pt | 2.36052115  | 0.00000000  | -2.36052115 |
| Pt | 0.00000000  | 2.36052115  | -2.36052115 |
| Pt | -2.36052115 | 2.36052115  | -0.00000000 |
| Pt | -2.36052115 | 0.00000000  | -2.36052115 |
| S  | -3.05718462 | -3.05718462 | 3.05718462  |
| S  | 3.05718462  | -3.05718462 | 3.05718462  |
| S  | 3.05718462  | 3.05718462  | 3.05718462  |
| S  | 3.05718462  | -3.05718462 | -3.05718462 |
| S  | -3.05718462 | 3.05718462  | 3.05718462  |
| S  | -3.05718462 | -3.05718462 | -3.05718462 |
| S  | 3.05718462  | 3.05718462  | -3.05718462 |
| S  | -3.05718462 | 3.05718462  | -3.05718462 |
| O  | 1.32230584  | -1.32230584 | 1.32230584  |
| O  | -1.32230584 | -1.32230584 | 1.32230584  |
| O  | -1.57941865 | -3.37481749 | 3.37481749  |
| O  | 1.57941865  | -3.37481749 | 3.37481749  |
| O  | 3.90833779  | -3.90833779 | 3.90833779  |
| O  | 1.32230584  | 1.32230584  | 1.32230584  |
| O  | 3.37481749  | -1.57941865 | 3.37481749  |
| O  | 3.37481749  | 1.57941865  | 3.37481749  |
| O  | 1.32230584  | -1.32230584 | -1.32230584 |
| O  | 3.37481749  | -3.37481749 | 1.57941865  |
| O  | 3.37481749  | -3.37481749 | -1.57941865 |
| O  | 1.32230584  | 1.32230584  | -1.32230584 |
| O  | -1.32230584 | 1.32230584  | 1.32230584  |
| O  | -1.32230584 | -1.32230584 | -1.32230584 |
| O  | -1.32230584 | 1.32230584  | -1.32230584 |
| O  | -3.37481749 | 1.57941865  | 3.37481749  |
| O  | -3.37481749 | -1.57941865 | 3.37481749  |
| O  | -3.37481749 | -3.37481749 | -1.57941865 |
| O  | -3.37481749 | -3.37481749 | 1.57941865  |
| O  | -1.57941865 | 3.37481749  | 3.37481749  |
| O  | 1.57941865  | 3.37481749  | 3.37481749  |
| O  | 3.37481749  | 3.37481749  | 1.57941865  |
| O  | 3.37481749  | 3.37481749  | -1.57941865 |
| O  | 3.90833779  | 3.90833779  | 3.90833779  |
| O  | -1.57941865 | -3.37481749 | -3.37481749 |
| O  | 1.57941865  | -3.37481749 | -3.37481749 |
| O  | 3.37481749  | -1.57941865 | -3.37481749 |
| O  | 3.37481749  | 1.57941865  | -3.37481749 |
| O  | 3.90833779  | -3.90833779 | -3.90833779 |
| O  | -1.57941865 | 3.37481749  | -3.37481749 |
| O  | 1.57941865  | 3.37481749  | -3.37481749 |
| O  | -3.37481749 | 3.37481749  | -1.57941865 |
| O  | -3.37481749 | 3.37481749  | 1.57941865  |
| O  | -3.37481749 | 1.57941865  | -3.37481749 |
| O  | -3.37481749 | -1.57941865 | -3.37481749 |
| O  | -3.90833779 | 3.90833779  | 3.90833779  |
| O  | -3.90833779 | -3.90833779 | -3.90833779 |
| O  | 3.90833779  | 3.90833779  | -3.90833779 |
| O  | -3.90833779 | 3.90833779  | -3.90833779 |
| O  | -3.90833779 | -3.90833779 | 3.90833779  |

**[Pt<sub>12</sub>O<sub>8</sub>(PO<sub>4</sub>)<sub>8</sub>]<sup>16-</sup> (D<sub>2h</sub>)**

Level: BP86/TZP/ZORA-scalar/COSMO-water

60

|    |             |             |            |
|----|-------------|-------------|------------|
| Pt | -0.00000000 | -2.37919310 | 2.37919310 |
| Pt | 2.37919310  | 0.00000000  | 2.37919310 |
| Pt | 2.37919310  | -2.37919310 | 0.00000000 |

|    |             |             |             |
|----|-------------|-------------|-------------|
| Pt | -2.37919310 | 0.00000000  | 2.37919310  |
| Pt | -2.37919310 | -2.37919310 | 0.00000000  |
| Pt | -0.00000000 | 2.37919310  | 2.37919310  |
| Pt | 2.37919310  | 2.37919310  | 0.00000000  |
| Pt | -0.00000000 | -2.37919310 | -2.37919310 |
| Pt | 2.37919310  | 0.00000000  | -2.37919310 |
| Pt | -0.00000000 | 2.37919310  | -2.37919310 |
| Pt | -2.37919310 | 2.37919310  | 0.00000000  |
| Pt | -2.37919310 | 0.00000000  | -2.37919310 |
| P  | -3.07506480 | -3.07506480 | 3.07506480  |
| P  | 3.07506480  | -3.07506480 | 3.07506480  |
| P  | 3.07506480  | 3.07506480  | 3.07506480  |
| P  | 3.07506480  | -3.07506480 | -3.07506480 |
| P  | -3.07506480 | 3.07506480  | 3.07506480  |
| P  | -3.07506480 | -3.07506480 | -3.07506480 |
| P  | 3.07506480  | 3.07506480  | -3.07506480 |
| P  | -3.07506480 | 3.07506480  | -3.07506480 |
| O  | 1.33456474  | -1.33456474 | 1.33456474  |
| O  | -1.33456474 | -1.33456474 | 1.33456474  |
| O  | -1.55201385 | -3.40777710 | 3.40777710  |
| O  | 1.55201385  | -3.40777710 | 3.40777710  |
| O  | 3.96571295  | -3.96571295 | 3.96571295  |
| O  | 1.33456474  | 1.33456474  | 1.33456474  |
| O  | 3.40777710  | -1.55201385 | 3.40777710  |
| O  | 3.40777710  | 1.55201385  | 3.40777710  |
| O  | 1.33456474  | -1.33456474 | -1.33456474 |
| O  | 3.40777710  | -3.40777710 | 1.55201385  |
| O  | 3.40777710  | -3.40777710 | -1.55201385 |
| O  | 1.33456474  | 1.33456474  | -1.33456474 |
| O  | -1.33456474 | 1.33456474  | 1.33456474  |
| O  | -1.33456474 | -1.33456474 | -1.33456474 |
| O  | -1.33456474 | 1.33456474  | -1.33456474 |
| O  | -3.40777710 | 1.55201385  | 3.40777710  |
| O  | -3.40777710 | -1.55201385 | 3.40777710  |
| O  | -3.40777710 | -3.40777710 | -1.55201385 |
| O  | -3.40777710 | -3.40777710 | 1.55201385  |
| O  | -1.55201385 | 3.40777710  | 3.40777710  |
| O  | 1.55201385  | 3.40777710  | 3.40777710  |
| O  | 3.40777710  | 3.40777710  | 1.55201385  |
| O  | 3.40777710  | 3.40777710  | -1.55201385 |
| O  | 3.96571295  | 3.96571295  | 3.96571295  |
| O  | -1.55201385 | -3.40777710 | -3.40777710 |
| O  | 1.55201385  | -3.40777710 | -3.40777710 |
| O  | 3.40777710  | -1.55201385 | -3.40777710 |
| O  | 3.40777710  | 1.55201385  | -3.40777710 |
| O  | 3.96571295  | -3.96571295 | -3.96571295 |
| O  | -1.55201385 | 3.40777710  | -3.40777710 |
| O  | 1.55201385  | 3.40777710  | -3.40777710 |
| O  | -3.40777710 | 3.40777710  | -1.55201385 |
| O  | -3.40777710 | 3.40777710  | 1.55201385  |
| O  | -3.40777710 | 1.55201385  | -3.40777710 |
| O  | -3.40777710 | -1.55201385 | -3.40777710 |
| O  | -3.96571295 | 3.96571295  | 3.96571295  |
| O  | -3.96571295 | -3.96571295 | -3.96571295 |
| O  | 3.96571295  | 3.96571295  | -3.96571295 |
| O  | -3.96571295 | 3.96571295  | -3.96571295 |
| O  | -3.96571295 | -3.96571295 | 3.96571295  |

Cartesian coordinates (in Angstroms) of the Au/POM/Au junction with  $\{[Pt_{12}O_8(SO_4)_{12}]\}$ .

368

xyz

|    |               |              |              |
|----|---------------|--------------|--------------|
| Au | 0.000000e+00  | 0.000000e+00 | 1.453735e+00 |
| Au | 2.945068e+00  | 0.000000e+00 | 1.453735e+00 |
| Au | 5.890136e+00  | 0.000000e+00 | 1.453735e+00 |
| Au | 8.835204e+00  | 0.000000e+00 | 1.453735e+00 |
| Au | 1.178027e+01  | 0.000000e+00 | 1.453735e+00 |
| Au | 1.472534e+01  | 0.000000e+00 | 1.453735e+00 |
| Au | -1.472534e+00 | 2.550504e+00 | 1.453735e+00 |
| Au | 1.472534e+00  | 2.550504e+00 | 1.453735e+00 |
| Au | 4.417602e+00  | 2.550504e+00 | 1.453735e+00 |
| Au | 7.362670e+00  | 2.550504e+00 | 1.453735e+00 |
| Au | 1.030774e+01  | 2.550504e+00 | 1.453735e+00 |
| Au | 1.325281e+01  | 2.550504e+00 | 1.453735e+00 |
| Au | -2.945068e+00 | 5.101007e+00 | 1.453735e+00 |
| Au | -9.000000e-12 | 5.101007e+00 | 1.453735e+00 |
| Au | 2.945068e+00  | 5.101007e+00 | 1.453735e+00 |
| Au | 5.890136e+00  | 5.101007e+00 | 1.453735e+00 |
| Au | 8.835204e+00  | 5.101007e+00 | 1.453735e+00 |
| Au | 1.178027e+01  | 5.101007e+00 | 1.453735e+00 |
| Au | -4.417602e+00 | 7.651511e+00 | 1.453735e+00 |
| Au | -1.472534e+00 | 7.651511e+00 | 1.453735e+00 |
| Au | 1.472534e+00  | 7.651511e+00 | 1.453735e+00 |
| Au | 4.417602e+00  | 7.651511e+00 | 1.453735e+00 |
| Au | 7.362670e+00  | 7.651511e+00 | 1.453735e+00 |
| Au | 1.030774e+01  | 7.651511e+00 | 1.453735e+00 |
| Au | -5.890136e+00 | 1.020201e+01 | 1.453735e+00 |
| Au | -2.945068e+00 | 1.020201e+01 | 1.453735e+00 |
| Au | 0.000000e+00  | 1.020201e+01 | 1.453735e+00 |
| Au | 2.945068e+00  | 1.020201e+01 | 1.453735e+00 |
| Au | 5.890136e+00  | 1.020201e+01 | 1.453735e+00 |
| Au | 8.835204e+00  | 1.020201e+01 | 1.453735e+00 |
| Au | -7.362670e+00 | 1.275252e+01 | 1.453735e+00 |
| Au | -4.417602e+00 | 1.275252e+01 | 1.453735e+00 |
| Au | -1.472534e+00 | 1.275252e+01 | 1.453735e+00 |
| Au | 1.472534e+00  | 1.275252e+01 | 1.453735e+00 |
| Au | 4.417602e+00  | 1.275252e+01 | 1.453735e+00 |
| Au | 7.362670e+00  | 1.275252e+01 | 1.453735e+00 |
| Au | 1.472534e+00  | 8.501679e-01 | 3.858373e+00 |
| Au | 4.417602e+00  | 8.501679e-01 | 3.858373e+00 |
| Au | 7.362670e+00  | 8.501679e-01 | 3.858373e+00 |
| Au | 1.030774e+01  | 8.501679e-01 | 3.858373e+00 |
| Au | 1.325281e+01  | 8.501679e-01 | 3.858373e+00 |
| Au | 1.619787e+01  | 8.501679e-01 | 3.858373e+00 |
| Au | 9.000000e-12  | 3.400672e+00 | 3.858373e+00 |
| Au | 2.945068e+00  | 3.400672e+00 | 3.858373e+00 |
| Au | 5.890136e+00  | 3.400672e+00 | 3.858373e+00 |
| Au | 8.835204e+00  | 3.400672e+00 | 3.858373e+00 |
| Au | 1.178027e+01  | 3.400672e+00 | 3.858373e+00 |
| Au | 1.472534e+01  | 3.400672e+00 | 3.858373e+00 |
| Au | -1.472534e+00 | 5.951175e+00 | 3.858373e+00 |
| Au | 1.472534e+00  | 5.951175e+00 | 3.858373e+00 |
| Au | 4.417602e+00  | 5.951175e+00 | 3.858373e+00 |
| Au | 7.362670e+00  | 5.951175e+00 | 3.858373e+00 |
| Au | 1.030774e+01  | 5.951175e+00 | 3.858373e+00 |
| Au | 1.325281e+01  | 5.951175e+00 | 3.858373e+00 |
| Au | -2.945068e+00 | 8.501679e+00 | 3.858373e+00 |
| Au | 0.000000e+00  | 8.501679e+00 | 3.858373e+00 |
| Au | 2.945068e+00  | 8.501679e+00 | 3.858373e+00 |

|    |               |              |              |
|----|---------------|--------------|--------------|
| Au | 5.890136e+00  | 8.501679e+00 | 3.858373e+00 |
| Au | 8.835204e+00  | 8.501679e+00 | 3.858373e+00 |
| Au | 1.178027e+01  | 8.501679e+00 | 3.858373e+00 |
| Au | -4.417602e+00 | 1.105218e+01 | 3.858373e+00 |
| Au | -1.472534e+00 | 1.105218e+01 | 3.858373e+00 |
| Au | 1.472534e+00  | 1.105218e+01 | 3.858373e+00 |
| Au | 4.417602e+00  | 1.105218e+01 | 3.858373e+00 |
| Au | 7.362670e+00  | 1.105218e+01 | 3.858373e+00 |
| Au | 1.030774e+01  | 1.105218e+01 | 3.858373e+00 |
| Au | -5.890136e+00 | 1.360269e+01 | 3.858373e+00 |
| Au | -2.945068e+00 | 1.360269e+01 | 3.858373e+00 |
| Au | -9.000000e-12 | 1.360269e+01 | 3.858373e+00 |
| Au | 2.945068e+00  | 1.360269e+01 | 3.858373e+00 |
| Au | 5.890136e+00  | 1.360269e+01 | 3.858373e+00 |
| Au | 8.835204e+00  | 1.360269e+01 | 3.858373e+00 |
| Au | -0.000000e+00 | 1.700336e+00 | 6.263011e+00 |
| Au | 2.945068e+00  | 1.700336e+00 | 6.263011e+00 |
| Au | 5.890136e+00  | 1.700336e+00 | 6.263011e+00 |
| Au | 8.835204e+00  | 1.700336e+00 | 6.263011e+00 |
| Au | 1.178027e+01  | 1.700336e+00 | 6.263011e+00 |
| Au | 1.472534e+01  | 1.700336e+00 | 6.263011e+00 |
| Au | -1.472534e+00 | 4.250839e+00 | 6.263011e+00 |
| Au | 1.472534e+00  | 4.250839e+00 | 6.263011e+00 |
| Au | 4.417602e+00  | 4.250839e+00 | 6.263011e+00 |
| Au | 7.362670e+00  | 4.250839e+00 | 6.263011e+00 |
| Au | 1.030774e+01  | 4.250839e+00 | 6.263011e+00 |
| Au | 1.325281e+01  | 4.250839e+00 | 6.263011e+00 |
| Au | -2.945068e+00 | 6.801343e+00 | 6.263011e+00 |
| Au | -0.000000e+00 | 6.801343e+00 | 6.263011e+00 |
| Au | 2.945068e+00  | 6.801343e+00 | 6.263011e+00 |
| Au | 5.890136e+00  | 6.801343e+00 | 6.263011e+00 |
| Au | 8.835204e+00  | 6.801343e+00 | 6.263011e+00 |
| Au | 1.178027e+01  | 6.801343e+00 | 6.263011e+00 |
| Au | -4.417602e+00 | 9.351847e+00 | 6.263011e+00 |
| Au | -1.472534e+00 | 9.351847e+00 | 6.263011e+00 |
| Au | 1.472534e+00  | 9.351847e+00 | 6.263011e+00 |
| Au | 4.417602e+00  | 9.351847e+00 | 6.263011e+00 |
| Au | 7.362670e+00  | 9.351847e+00 | 6.263011e+00 |
| Au | 1.030774e+01  | 9.351847e+00 | 6.263011e+00 |
| Au | -5.890136e+00 | 1.190235e+01 | 6.263011e+00 |
| Au | -2.945068e+00 | 1.190235e+01 | 6.263011e+00 |
| Au | 9.000000e-12  | 1.190235e+01 | 6.263011e+00 |
| Au | 2.945068e+00  | 1.190235e+01 | 6.263011e+00 |
| Au | 5.890136e+00  | 1.190235e+01 | 6.263011e+00 |
| Au | 8.835204e+00  | 1.190235e+01 | 6.263011e+00 |
| Au | -7.362670e+00 | 1.445285e+01 | 6.263011e+00 |
| Au | -4.417602e+00 | 1.445285e+01 | 6.263011e+00 |
| Au | -1.472534e+00 | 1.445285e+01 | 6.263011e+00 |
| Au | 1.472534e+00  | 1.445285e+01 | 6.263011e+00 |
| Au | 4.417602e+00  | 1.445285e+01 | 6.263011e+00 |
| Au | 7.362670e+00  | 1.445285e+01 | 6.263011e+00 |
| Au | 6.121079e+00  | 1.012457e+01 | 8.455440e+00 |
| Au | 6.087970e+00  | 5.176935e+00 | 8.499066e+00 |
| Au | 4.425656e+00  | 1.282994e+01 | 8.580958e+00 |
| Au | 4.416328e+00  | 2.448940e+00 | 8.590352e+00 |
| Au | 7.397747e+00  | 1.276245e+01 | 8.608713e+00 |
| Au | 7.398479e+00  | 2.550537e+00 | 8.616270e+00 |
| Au | 8.964722e+00  | 1.021093e+01 | 8.618837e+00 |
| Au | 2.805207e+00  | 1.016293e+01 | 8.628199e+00 |
| Au | 8.945679e+00  | 5.104115e+00 | 8.628992e+00 |
| Au | 1.033119e+01  | 2.553748e+00 | 8.641638e+00 |
| Au | 1.178772e+01  | 2.841440e-02 | 8.647998e+00 |

|    |               |               |              |
|----|---------------|---------------|--------------|
| Au | 1.473764e+01  | 2.548370e-02  | 8.649134e+00 |
| Au | 8.852116e+00  | 8.069351e-03  | 8.652917e+00 |
| Au | 1.469692e+00  | 1.277035e+01  | 8.655886e+00 |
| Au | 7.497606e+00  | 7.651537e+00  | 8.659199e+00 |
| Au | 2.824276e+00  | 5.140370e+00  | 8.659574e+00 |
| Au | 1.326548e+01  | 2.556163e+00  | 8.659841e+00 |
| Au | 1.038151e+01  | 7.656737e+00  | 8.663820e+00 |
| Au | 0.000000e+00  | 0.000000e+00  | 8.667649e+00 |
| Au | 1.181942e+01  | 5.096237e+00  | 8.668295e+00 |
| Au | 5.916710e+00  | -1.929691e-02 | 8.669100e+00 |
| Au | -7.340568e+00 | 1.276110e+01  | 8.676154e+00 |
| Au | -1.471112e+00 | 2.550078e+00  | 8.676247e+00 |
| Au | 2.935156e+00  | -2.484591e-02 | 8.678560e+00 |
| Au | 1.467732e+00  | 2.533566e+00  | 8.685124e+00 |
| Au | -5.840878e+00 | 1.021141e+01  | 8.686929e+00 |
| Au | -1.469071e+00 | 1.276455e+01  | 8.687938e+00 |
| Au | -4.406693e+00 | 1.275952e+01  | 8.690708e+00 |
| Au | -4.404109e+00 | 7.655092e+00  | 8.692243e+00 |
| Au | -2.946043e+00 | 5.097259e+00  | 8.694095e+00 |
| Au | 4.438153e+00  | 7.658825e+00  | 8.702800e+00 |
| Au | -2.947362e+00 | 1.021259e+01  | 8.703795e+00 |
| Au | -5.925249e-02 | 1.020569e+01  | 8.709082e+00 |
| Au | -4.553389e-02 | 5.094813e+00  | 8.726877e+00 |
| Au | -1.498108e+00 | 7.650672e+00  | 8.773572e+00 |
| Au | 1.415625e+00  | 7.649273e+00  | 8.805029e+00 |
| O  | 4.639267e+00  | 1.080479e+01  | 1.010018e+01 |
| O  | 4.637920e+00  | 4.400723e+00  | 1.015240e+01 |
| O  | 3.366248e+00  | 8.977292e+00  | 1.123674e+01 |
| O  | 3.340785e+00  | 6.214440e+00  | 1.127014e+01 |
| S  | 4.643615e+00  | 9.890598e+00  | 1.136359e+01 |
| O  | 5.913918e+00  | 8.985356e+00  | 1.136392e+01 |
| O  | 5.891970e+00  | 6.223336e+00  | 1.137873e+01 |
| S  | 4.624203e+00  | 5.313538e+00  | 1.140051e+01 |
| O  | 1.277380e+00  | 7.621901e+00  | 1.210478e+01 |
| O  | -1.170060e+00 | 7.634868e+00  | 1.240417e+01 |
| O  | 4.588726e+00  | 1.093479e+01  | 1.246249e+01 |
| O  | 4.586267e+00  | 4.279844e+00  | 1.251121e+01 |
| O  | 7.922625e+00  | 7.595384e+00  | 1.254602e+01 |
| Pt | 3.276284e+00  | 7.615297e+00  | 1.283210e+01 |
| Pt | 5.859020e+00  | 7.603684e+00  | 1.297843e+01 |
| O  | 1.033511e+01  | 7.590859e+00  | 1.306677e+01 |
| S  | 1.079952e-01  | 7.633725e+00  | 1.315333e+01 |
| S  | 8.994301e+00  | 7.594602e+00  | 1.368602e+01 |
| O  | 2.188577e-01  | 8.920977e+00  | 1.406699e+01 |
| O  | 2.069853e-01  | 6.357457e+00  | 1.408375e+01 |
| O  | 3.001275e+00  | 9.102009e+00  | 1.414262e+01 |
| O  | 2.989886e+00  | 6.157000e+00  | 1.417204e+01 |
| O  | 6.035940e+00  | 6.126377e+00  | 1.432137e+01 |
| O  | 6.047325e+00  | 9.072060e+00  | 1.432361e+01 |
| O  | 3.216043e+00  | 1.190537e+01  | 1.438195e+01 |
| O  | 3.122603e+00  | 3.370797e+00  | 1.441423e+01 |
| Pt | 4.522237e+00  | 1.037351e+01  | 1.448057e+01 |
| O  | 5.903017e+00  | 1.184227e+01  | 1.450057e+01 |
| Pt | 4.483550e+00  | 4.854867e+00  | 1.451480e+01 |
| O  | 5.803754e+00  | 3.330660e+00  | 1.456068e+01 |
| O  | 8.822879e+00  | 8.880640e+00  | 1.459298e+01 |
| O  | 8.813445e+00  | 6.312254e+00  | 1.459714e+01 |
| O  | 1.104185e+00  | 1.096462e+01  | 1.549228e+01 |
| O  | 1.605147e+00  | 1.340942e+01  | 1.555646e+01 |
| Pt | 1.597745e+00  | 8.896818e+00  | 1.556347e+01 |
| Pt | 1.580296e+00  | 6.377646e+00  | 1.558489e+01 |
| S  | 2.191992e+00  | 1.205604e+01  | 1.558797e+01 |

|    |               |              |              |
|----|---------------|--------------|--------------|
| O  | 1.057051e+00  | 4.315879e+00 | 1.560046e+01 |
| O  | 1.531733e+00  | 1.865073e+00 | 1.561773e+01 |
| S  | 2.134804e+00  | 3.211119e+00 | 1.564884e+01 |
| S  | 6.732716e+00  | 1.202642e+01 | 1.584266e+01 |
| O  | 7.335054e+00  | 1.337298e+01 | 1.586433e+01 |
| S  | 6.680715e+00  | 3.185635e+00 | 1.587694e+01 |
| Pt | 7.266701e+00  | 6.345047e+00 | 1.589975e+01 |
| Pt | 7.282333e+00  | 8.862457e+00 | 1.590051e+01 |
| O  | 7.770847e+00  | 4.278341e+00 | 1.590684e+01 |
| O  | 7.269238e+00  | 1.833233e+00 | 1.592275e+01 |
| O  | 7.807156e+00  | 1.092305e+01 | 1.595018e+01 |
| O  | 6.061015e-02  | 8.943135e+00 | 1.687491e+01 |
| O  | 2.383974e-02  | 6.374473e+00 | 1.687785e+01 |
| O  | 3.021304e+00  | 1.187382e+01 | 1.693067e+01 |
| Pt | 4.378836e+00  | 1.038309e+01 | 1.695902e+01 |
| O  | 3.010437e+00  | 3.360962e+00 | 1.696595e+01 |
| Pt | 4.350356e+00  | 4.865784e+00 | 1.699570e+01 |
| O  | 5.704638e+00  | 1.189961e+01 | 1.704769e+01 |
| O  | 5.698150e+00  | 3.371197e+00 | 1.711178e+01 |
| O  | 2.834853e+00  | 9.102790e+00 | 1.713655e+01 |
| O  | 2.809946e+00  | 6.151638e+00 | 1.716235e+01 |
| O  | 5.880953e+00  | 9.094495e+00 | 1.731789e+01 |
| O  | 5.860055e+00  | 6.152561e+00 | 1.731981e+01 |
| O  | 8.662185e+00  | 8.876428e+00 | 1.739837e+01 |
| O  | 8.634210e+00  | 6.312524e+00 | 1.740840e+01 |
| S  | -1.351419e-01 | 7.662196e+00 | 1.778506e+01 |
| S  | 8.752333e+00  | 7.597154e+00 | 1.832590e+01 |
| O  | -1.475788e+00 | 7.683703e+00 | 1.840466e+01 |
| Pt | 3.000365e+00  | 7.636923e+00 | 1.848884e+01 |
| Pt | 5.583686e+00  | 7.626178e+00 | 1.864465e+01 |
| O  | 9.365065e-01  | 7.645138e+00 | 1.892449e+01 |
| O  | 4.318637e+00  | 1.095098e+01 | 1.896043e+01 |
| O  | 4.265316e+00  | 4.299478e+00 | 1.901712e+01 |
| O  | 1.002979e+01  | 7.584605e+00 | 1.907673e+01 |
| O  | 7.582076e+00  | 7.617187e+00 | 1.937449e+01 |
| O  | 2.943283e+00  | 9.040184e+00 | 2.006956e+01 |
| S  | 4.226865e+00  | 9.925288e+00 | 2.007508e+01 |
| O  | 2.950261e+00  | 6.264029e+00 | 2.009907e+01 |
| S  | 4.216668e+00  | 5.354280e+00 | 2.010528e+01 |
| O  | 5.503386e+00  | 6.251515e+00 | 2.022575e+01 |
| O  | 5.490394e+00  | 8.996842e+00 | 2.023436e+01 |
| O  | 4.204724e+00  | 1.085691e+01 | 2.131017e+01 |
| O  | 4.205097e+00  | 4.466044e+00 | 2.138358e+01 |
| Au | 9.828019e-01  | 7.714594e+00 | 2.273096e+01 |
| Au | -1.930931e+00 | 7.715993e+00 | 2.276242e+01 |
| Au | -4.783568e-01 | 5.160134e+00 | 2.280911e+01 |
| Au | -4.920754e-01 | 1.027101e+01 | 2.282691e+01 |
| Au | -3.380185e+00 | 1.027791e+01 | 2.283219e+01 |
| Au | 4.005330e+00  | 7.724146e+00 | 2.283319e+01 |
| Au | -3.378866e+00 | 5.162581e+00 | 2.284189e+01 |
| Au | -4.836932e+00 | 7.720413e+00 | 2.284375e+01 |
| Au | -4.839516e+00 | 1.282484e+01 | 2.284528e+01 |
| Au | -1.901894e+00 | 1.282987e+01 | 2.284805e+01 |
| Au | -6.273701e+00 | 1.027673e+01 | 2.284906e+01 |
| Au | 1.034909e+00  | 2.598887e+00 | 2.285086e+01 |
| Au | 2.502334e+00  | 4.047530e-02 | 2.285743e+01 |
| Au | -1.903935e+00 | 2.615400e+00 | 2.285974e+01 |
| Au | -7.773391e+00 | 1.282642e+01 | 2.285983e+01 |
| Au | 5.483887e+00  | 4.602430e-02 | 2.286689e+01 |
| Au | 1.138660e+01  | 5.161559e+00 | 2.286769e+01 |
| Au | -4.328229e-01 | 6.532121e-02 | 2.286834e+01 |
| Au | 9.948688e+00  | 7.722058e+00 | 2.287217e+01 |



|    |               |              |              |
|----|---------------|--------------|--------------|
| Au | 1.283266e+01  | 2.621484e+00 | 2.287615e+01 |
| Au | 2.391453e+00  | 5.205691e+00 | 2.287641e+01 |
| Au | 7.064783e+00  | 7.716858e+00 | 2.287679e+01 |
| Au | 1.036869e+00  | 1.283567e+01 | 2.288010e+01 |
| Au | 8.419293e+00  | 7.339056e-02 | 2.288307e+01 |
| Au | 1.430482e+01  | 9.080491e-02 | 2.288685e+01 |
| Au | 1.135490e+01  | 9.373561e-02 | 2.288799e+01 |
| Au | 9.898365e+00  | 2.619069e+00 | 2.289435e+01 |
| Au | 8.512856e+00  | 5.169437e+00 | 2.290700e+01 |
| Au | 2.372384e+00  | 1.022825e+01 | 2.290779e+01 |
| Au | 8.531899e+00  | 1.027625e+01 | 2.291715e+01 |
| Au | 6.965656e+00  | 2.615858e+00 | 2.291972e+01 |
| Au | 6.964924e+00  | 1.282777e+01 | 2.292728e+01 |
| Au | 3.983505e+00  | 2.514261e+00 | 2.294564e+01 |
| Au | 3.992833e+00  | 1.289526e+01 | 2.295503e+01 |
| Au | 5.655147e+00  | 5.242256e+00 | 2.303692e+01 |
| Au | 5.688256e+00  | 1.018989e+01 | 2.308055e+01 |
| Au | -4.328229e-01 | 1.765657e+00 | 2.527298e+01 |
| Au | 2.512245e+00  | 1.765657e+00 | 2.527298e+01 |
| Au | 5.457313e+00  | 1.765657e+00 | 2.527298e+01 |
| Au | 8.402381e+00  | 1.765657e+00 | 2.527298e+01 |
| Au | 1.134745e+01  | 1.765657e+00 | 2.527298e+01 |
| Au | 1.429252e+01  | 1.765657e+00 | 2.527298e+01 |
| Au | -1.905357e+00 | 4.316161e+00 | 2.527298e+01 |
| Au | 1.039711e+00  | 4.316161e+00 | 2.527298e+01 |
| Au | 3.984779e+00  | 4.316161e+00 | 2.527298e+01 |
| Au | 6.929847e+00  | 4.316161e+00 | 2.527298e+01 |
| Au | 9.874915e+00  | 4.316161e+00 | 2.527298e+01 |
| Au | 1.281998e+01  | 4.316161e+00 | 2.527298e+01 |
| Au | -3.377891e+00 | 6.866664e+00 | 2.527298e+01 |
| Au | -4.328229e-01 | 6.866664e+00 | 2.527298e+01 |
| Au | 2.512245e+00  | 6.866664e+00 | 2.527298e+01 |
| Au | 5.457313e+00  | 6.866664e+00 | 2.527298e+01 |
| Au | 8.402381e+00  | 6.866664e+00 | 2.527298e+01 |
| Au | 1.134745e+01  | 6.866664e+00 | 2.527298e+01 |
| Au | -4.850425e+00 | 9.417168e+00 | 2.527298e+01 |
| Au | -1.905357e+00 | 9.417168e+00 | 2.527298e+01 |
| Au | 1.039711e+00  | 9.417168e+00 | 2.527298e+01 |
| Au | 3.984779e+00  | 9.417168e+00 | 2.527298e+01 |
| Au | 6.929847e+00  | 9.417168e+00 | 2.527298e+01 |
| Au | 9.874915e+00  | 9.417168e+00 | 2.527298e+01 |
| Au | -6.322959e+00 | 1.196767e+01 | 2.527298e+01 |
| Au | -3.377891e+00 | 1.196767e+01 | 2.527298e+01 |
| Au | -4.328229e-01 | 1.196767e+01 | 2.527298e+01 |
| Au | 2.512245e+00  | 1.196767e+01 | 2.527298e+01 |
| Au | 5.457313e+00  | 1.196767e+01 | 2.527298e+01 |
| Au | 8.402381e+00  | 1.196767e+01 | 2.527298e+01 |
| Au | -7.795493e+00 | 1.451818e+01 | 2.527298e+01 |
| Au | -4.850425e+00 | 1.451818e+01 | 2.527298e+01 |
| Au | -1.905357e+00 | 1.451818e+01 | 2.527298e+01 |
| Au | 1.039711e+00  | 1.451818e+01 | 2.527298e+01 |
| Au | 3.984779e+00  | 1.451818e+01 | 2.527298e+01 |
| Au | 6.929847e+00  | 1.451818e+01 | 2.527298e+01 |
| Au | 1.039711e+00  | 9.154891e-01 | 2.767762e+01 |
| Au | 3.984779e+00  | 9.154891e-01 | 2.767762e+01 |
| Au | 6.929847e+00  | 9.154891e-01 | 2.767762e+01 |
| Au | 9.874915e+00  | 9.154891e-01 | 2.767762e+01 |
| Au | 1.281998e+01  | 9.154891e-01 | 2.767762e+01 |
| Au | 1.576505e+01  | 9.154891e-01 | 2.767762e+01 |
| Au | -4.328229e-01 | 3.465993e+00 | 2.767762e+01 |
| Au | 2.512245e+00  | 3.465993e+00 | 2.767762e+01 |
| Au | 5.457313e+00  | 3.465993e+00 | 2.767762e+01 |

|    |               |              |              |
|----|---------------|--------------|--------------|
| Au | 8.402381e+00  | 3.465993e+00 | 2.767762e+01 |
| Au | 1.134745e+01  | 3.465993e+00 | 2.767762e+01 |
| Au | 1.429252e+01  | 3.465993e+00 | 2.767762e+01 |
| Au | -1.905357e+00 | 6.016496e+00 | 2.767762e+01 |
| Au | 1.039711e+00  | 6.016496e+00 | 2.767762e+01 |
| Au | 3.984779e+00  | 6.016496e+00 | 2.767762e+01 |
| Au | 6.929847e+00  | 6.016496e+00 | 2.767762e+01 |
| Au | 9.874915e+00  | 6.016496e+00 | 2.767762e+01 |
| Au | 1.281998e+01  | 6.016496e+00 | 2.767762e+01 |
| Au | -3.377891e+00 | 8.567000e+00 | 2.767762e+01 |
| Au | -4.328229e-01 | 8.567000e+00 | 2.767762e+01 |
| Au | 2.512245e+00  | 8.567000e+00 | 2.767762e+01 |
| Au | 5.457313e+00  | 8.567000e+00 | 2.767762e+01 |
| Au | 8.402381e+00  | 8.567000e+00 | 2.767762e+01 |
| Au | 1.134745e+01  | 8.567000e+00 | 2.767762e+01 |
| Au | -4.850425e+00 | 1.111750e+01 | 2.767762e+01 |
| Au | -1.905357e+00 | 1.111750e+01 | 2.767762e+01 |
| Au | 1.039711e+00  | 1.111750e+01 | 2.767762e+01 |
| Au | 3.984779e+00  | 1.111750e+01 | 2.767762e+01 |
| Au | 6.929847e+00  | 1.111750e+01 | 2.767762e+01 |
| Au | 9.874915e+00  | 1.111750e+01 | 2.767762e+01 |
| Au | -6.322959e+00 | 1.366801e+01 | 2.767762e+01 |
| Au | -3.377891e+00 | 1.366801e+01 | 2.767762e+01 |
| Au | -4.328229e-01 | 1.366801e+01 | 2.767762e+01 |
| Au | 2.512245e+00  | 1.366801e+01 | 2.767762e+01 |
| Au | 5.457313e+00  | 1.366801e+01 | 2.767762e+01 |
| Au | 8.402381e+00  | 1.366801e+01 | 2.767762e+01 |
| Au | -4.328229e-01 | 6.532121e-02 | 3.008225e+01 |
| Au | 2.512245e+00  | 6.532121e-02 | 3.008225e+01 |
| Au | 5.457313e+00  | 6.532121e-02 | 3.008225e+01 |
| Au | 8.402381e+00  | 6.532121e-02 | 3.008225e+01 |
| Au | 1.134745e+01  | 6.532121e-02 | 3.008225e+01 |
| Au | 1.429252e+01  | 6.532121e-02 | 3.008225e+01 |
| Au | -1.905357e+00 | 2.615825e+00 | 3.008225e+01 |
| Au | 1.039711e+00  | 2.615825e+00 | 3.008225e+01 |
| Au | 3.984779e+00  | 2.615825e+00 | 3.008225e+01 |
| Au | 6.929847e+00  | 2.615825e+00 | 3.008225e+01 |
| Au | 9.874915e+00  | 2.615825e+00 | 3.008225e+01 |
| Au | 1.281998e+01  | 2.615825e+00 | 3.008225e+01 |
| Au | -3.377891e+00 | 5.166329e+00 | 3.008225e+01 |
| Au | -4.328229e-01 | 5.166329e+00 | 3.008225e+01 |
| Au | 2.512245e+00  | 5.166329e+00 | 3.008225e+01 |
| Au | 5.457313e+00  | 5.166329e+00 | 3.008225e+01 |
| Au | 8.402381e+00  | 5.166329e+00 | 3.008225e+01 |
| Au | 1.134745e+01  | 5.166329e+00 | 3.008225e+01 |
| Au | -4.850425e+00 | 7.716832e+00 | 3.008225e+01 |
| Au | -1.905357e+00 | 7.716832e+00 | 3.008225e+01 |
| Au | 1.039711e+00  | 7.716832e+00 | 3.008225e+01 |
| Au | 3.984779e+00  | 7.716832e+00 | 3.008225e+01 |
| Au | 6.929847e+00  | 7.716832e+00 | 3.008225e+01 |
| Au | 9.874915e+00  | 7.716832e+00 | 3.008225e+01 |
| Au | -6.322959e+00 | 1.026734e+01 | 3.008225e+01 |
| Au | -3.377891e+00 | 1.026734e+01 | 3.008225e+01 |
| Au | -4.328229e-01 | 1.026734e+01 | 3.008225e+01 |
| Au | 2.512245e+00  | 1.026734e+01 | 3.008225e+01 |
| Au | 5.457313e+00  | 1.026734e+01 | 3.008225e+01 |
| Au | 8.402381e+00  | 1.026734e+01 | 3.008225e+01 |
| Au | -7.795493e+00 | 1.281784e+01 | 3.008225e+01 |
| Au | -4.850425e+00 | 1.281784e+01 | 3.008225e+01 |
| Au | -1.905357e+00 | 1.281784e+01 | 3.008225e+01 |
| Au | 1.039711e+00  | 1.281784e+01 | 3.008225e+01 |
| Au | 3.984779e+00  | 1.281784e+01 | 3.008225e+01 |

Au 6.929847e+00 1.281784e+01 3.008225e+01

Cartesian coordinates (in Angstroms) of the Au/POM/Au junction with  $\{K_4[Pt_{12}O_8(SO_4)_{12}]\}$ .

372

xyz

|    |               |              |              |
|----|---------------|--------------|--------------|
| Au | 0.000000e+00  | 0.000000e+00 | 1.235393e+00 |
| Au | 2.945068e+00  | 0.000000e+00 | 1.235393e+00 |
| Au | 5.890136e+00  | 0.000000e+00 | 1.235393e+00 |
| Au | 8.835204e+00  | 0.000000e+00 | 1.235393e+00 |
| Au | 1.178027e+01  | 0.000000e+00 | 1.235393e+00 |
| Au | 1.472534e+01  | 0.000000e+00 | 1.235393e+00 |
| Au | -1.472534e+00 | 2.550504e+00 | 1.235393e+00 |
| Au | 1.472534e+00  | 2.550504e+00 | 1.235393e+00 |
| Au | 4.417602e+00  | 2.550504e+00 | 1.235393e+00 |
| Au | 7.362670e+00  | 2.550504e+00 | 1.235393e+00 |
| Au | 1.030774e+01  | 2.550504e+00 | 1.235393e+00 |
| Au | 1.325281e+01  | 2.550504e+00 | 1.235393e+00 |
| Au | -2.945068e+00 | 5.101007e+00 | 1.235393e+00 |
| Au | -9.000000e-12 | 5.101007e+00 | 1.235393e+00 |
| Au | 2.945068e+00  | 5.101007e+00 | 1.235393e+00 |
| Au | 5.890136e+00  | 5.101007e+00 | 1.235393e+00 |
| Au | 8.835204e+00  | 5.101007e+00 | 1.235393e+00 |
| Au | 1.178027e+01  | 5.101007e+00 | 1.235393e+00 |
| Au | -4.417602e+00 | 7.651511e+00 | 1.235393e+00 |
| Au | -1.472534e+00 | 7.651511e+00 | 1.235393e+00 |
| Au | 1.472534e+00  | 7.651511e+00 | 1.235393e+00 |
| Au | 4.417602e+00  | 7.651511e+00 | 1.235393e+00 |
| Au | 7.362670e+00  | 7.651511e+00 | 1.235393e+00 |
| Au | 1.030774e+01  | 7.651511e+00 | 1.235393e+00 |
| Au | -5.890136e+00 | 1.020201e+01 | 1.235393e+00 |
| Au | -2.945068e+00 | 1.020201e+01 | 1.235393e+00 |
| Au | 0.000000e+00  | 1.020201e+01 | 1.235393e+00 |
| Au | 2.945068e+00  | 1.020201e+01 | 1.235393e+00 |
| Au | 5.890136e+00  | 1.020201e+01 | 1.235393e+00 |
| Au | 8.835204e+00  | 1.020201e+01 | 1.235393e+00 |
| Au | -7.362670e+00 | 1.275252e+01 | 1.235393e+00 |
| Au | -4.417602e+00 | 1.275252e+01 | 1.235393e+00 |
| Au | -1.472534e+00 | 1.275252e+01 | 1.235393e+00 |
| Au | 1.472534e+00  | 1.275252e+01 | 1.235393e+00 |
| Au | 4.417602e+00  | 1.275252e+01 | 1.235393e+00 |
| Au | 7.362670e+00  | 1.275252e+01 | 1.235393e+00 |
| Au | 1.472534e+00  | 8.501679e-01 | 3.640031e+00 |
| Au | 4.417602e+00  | 8.501679e-01 | 3.640031e+00 |
| Au | 7.362670e+00  | 8.501679e-01 | 3.640031e+00 |
| Au | 1.030774e+01  | 8.501679e-01 | 3.640031e+00 |
| Au | 1.325281e+01  | 8.501679e-01 | 3.640031e+00 |
| Au | 1.619787e+01  | 8.501679e-01 | 3.640031e+00 |
| Au | 9.000000e-12  | 3.400672e+00 | 3.640031e+00 |
| Au | 2.945068e+00  | 3.400672e+00 | 3.640031e+00 |
| Au | 5.890136e+00  | 3.400672e+00 | 3.640031e+00 |
| Au | 8.835204e+00  | 3.400672e+00 | 3.640031e+00 |
| Au | 1.178027e+01  | 3.400672e+00 | 3.640031e+00 |
| Au | 1.472534e+01  | 3.400672e+00 | 3.640031e+00 |
| Au | -1.472534e+00 | 5.951175e+00 | 3.640031e+00 |
| Au | 1.472534e+00  | 5.951175e+00 | 3.640031e+00 |
| Au | 4.417602e+00  | 5.951175e+00 | 3.640031e+00 |
| Au | 7.362670e+00  | 5.951175e+00 | 3.640031e+00 |
| Au | 1.030774e+01  | 5.951175e+00 | 3.640031e+00 |
| Au | 1.325281e+01  | 5.951175e+00 | 3.640031e+00 |
| Au | -2.945068e+00 | 8.501679e+00 | 3.640031e+00 |
| Au | 0.000000e+00  | 8.501679e+00 | 3.640031e+00 |

|    |               |              |              |
|----|---------------|--------------|--------------|
| Au | 2.945068e+00  | 8.501679e+00 | 3.640031e+00 |
| Au | 5.890136e+00  | 8.501679e+00 | 3.640031e+00 |
| Au | 8.835204e+00  | 8.501679e+00 | 3.640031e+00 |
| Au | 1.178027e+01  | 8.501679e+00 | 3.640031e+00 |
| Au | -4.417602e+00 | 1.105218e+01 | 3.640031e+00 |
| Au | -1.472534e+00 | 1.105218e+01 | 3.640031e+00 |
| Au | 1.472534e+00  | 1.105218e+01 | 3.640031e+00 |
| Au | 4.417602e+00  | 1.105218e+01 | 3.640031e+00 |
| Au | 7.362670e+00  | 1.105218e+01 | 3.640031e+00 |
| Au | 1.030774e+01  | 1.105218e+01 | 3.640031e+00 |
| Au | -5.890136e+00 | 1.360269e+01 | 3.640031e+00 |
| Au | -2.945068e+00 | 1.360269e+01 | 3.640031e+00 |
| Au | -9.000000e-12 | 1.360269e+01 | 3.640031e+00 |
| Au | 2.945068e+00  | 1.360269e+01 | 3.640031e+00 |
| Au | 5.890136e+00  | 1.360269e+01 | 3.640031e+00 |
| Au | 8.835204e+00  | 1.360269e+01 | 3.640031e+00 |
| Au | -0.000000e+00 | 1.700336e+00 | 6.044669e+00 |
| Au | 2.945068e+00  | 1.700336e+00 | 6.044669e+00 |
| Au | 5.890136e+00  | 1.700336e+00 | 6.044669e+00 |
| Au | 8.835204e+00  | 1.700336e+00 | 6.044669e+00 |
| Au | 1.178027e+01  | 1.700336e+00 | 6.044669e+00 |
| Au | 1.472534e+01  | 1.700336e+00 | 6.044669e+00 |
| Au | -1.472534e+00 | 4.250839e+00 | 6.044669e+00 |
| Au | 1.472534e+00  | 4.250839e+00 | 6.044669e+00 |
| Au | 4.417602e+00  | 4.250839e+00 | 6.044669e+00 |
| Au | 7.362670e+00  | 4.250839e+00 | 6.044669e+00 |
| Au | 1.030774e+01  | 4.250839e+00 | 6.044669e+00 |
| Au | 1.325281e+01  | 4.250839e+00 | 6.044669e+00 |
| Au | -2.945068e+00 | 6.801343e+00 | 6.044669e+00 |
| Au | -0.000000e+00 | 6.801343e+00 | 6.044669e+00 |
| Au | 2.945068e+00  | 6.801343e+00 | 6.044669e+00 |
| Au | 5.890136e+00  | 6.801343e+00 | 6.044669e+00 |
| Au | 8.835204e+00  | 6.801343e+00 | 6.044669e+00 |
| Au | 1.178027e+01  | 6.801343e+00 | 6.044669e+00 |
| Au | -4.417602e+00 | 9.351847e+00 | 6.044669e+00 |
| Au | -1.472534e+00 | 9.351847e+00 | 6.044669e+00 |
| Au | 1.472534e+00  | 9.351847e+00 | 6.044669e+00 |
| Au | 4.417602e+00  | 9.351847e+00 | 6.044669e+00 |
| Au | 7.362670e+00  | 9.351847e+00 | 6.044669e+00 |
| Au | 1.030774e+01  | 9.351847e+00 | 6.044669e+00 |
| Au | -5.890136e+00 | 1.190235e+01 | 6.044669e+00 |
| Au | -2.945068e+00 | 1.190235e+01 | 6.044669e+00 |
| Au | 9.000000e-12  | 1.190235e+01 | 6.044669e+00 |
| Au | 2.945068e+00  | 1.190235e+01 | 6.044669e+00 |
| Au | 5.890136e+00  | 1.190235e+01 | 6.044669e+00 |
| Au | 8.835204e+00  | 1.190235e+01 | 6.044669e+00 |
| Au | -7.362670e+00 | 1.445285e+01 | 6.044669e+00 |
| Au | -4.417602e+00 | 1.445285e+01 | 6.044669e+00 |
| Au | -1.472534e+00 | 1.445285e+01 | 6.044669e+00 |
| Au | 1.472534e+00  | 1.445285e+01 | 6.044669e+00 |
| Au | 4.417602e+00  | 1.445285e+01 | 6.044669e+00 |
| Au | 7.362670e+00  | 1.445285e+01 | 6.044669e+00 |
| Au | 2.836520e+00  | 1.018065e+01 | 8.320513e+00 |
| Au | 2.844732e+00  | 5.132599e+00 | 8.336587e+00 |
| Au | 5.967940e+00  | 1.018995e+01 | 8.390944e+00 |
| Au | 4.430303e+00  | 1.277339e+01 | 8.401538e+00 |
| Au | 5.961665e+00  | 5.115286e+00 | 8.410952e+00 |
| Au | 4.430611e+00  | 2.521506e+00 | 8.417561e+00 |
| Au | 1.422052e+00  | 7.653030e+00 | 8.421778e+00 |
| Au | 1.459021e+00  | 2.545617e+00 | 8.422645e+00 |
| Au | -5.311773e-02 | 5.101853e+00 | 8.425370e+00 |
| Au | 1.462698e+00  | 1.276821e+01 | 8.425744e+00 |

|    |               |               |              |
|----|---------------|---------------|--------------|
| Au | 4.419977e+00  | 7.653645e+00  | 8.426512e+00 |
| Au | -1.477604e+00 | 2.546075e+00  | 8.429512e+00 |
| Au | 1.473371e+01  | 2.029591e-03  | 8.436668e+00 |
| Au | 1.178391e+01  | 2.013644e-03  | 8.437175e+00 |
| Au | -4.555661e-02 | 1.020184e+01  | 8.439683e+00 |
| Au | 1.325714e+01  | 2.544424e+00  | 8.441326e+00 |
| Au | -2.959046e+00 | 5.094366e+00  | 8.445783e+00 |
| Au | 0.000000e+00  | 0.000000e+00  | 8.449307e+00 |
| Au | -1.496749e+00 | 7.652467e+00  | 8.451467e+00 |
| Au | -1.472234e+00 | 1.275469e+01  | 8.453664e+00 |
| Au | 8.842063e+00  | 2.950144e-03  | 8.454060e+00 |
| Au | 1.031825e+01  | 2.544516e+00  | 8.457132e+00 |
| Au | 2.939954e+00  | -1.287459e-03 | 8.457445e+00 |
| Au | -2.955073e+00 | 1.020711e+01  | 8.461350e+00 |
| Au | 5.908174e+00  | -4.697349e-03 | 8.462151e+00 |
| Au | 1.179252e+01  | 5.093728e+00  | 8.462613e+00 |
| Au | -4.414814e+00 | 7.651992e+00  | 8.465127e+00 |
| Au | 7.380833e+00  | 1.275984e+01  | 8.466961e+00 |
| Au | 7.384078e+00  | 2.549954e+00  | 8.469949e+00 |
| Au | -4.411378e+00 | 1.276028e+01  | 8.472204e+00 |
| Au | -7.351994e+00 | 1.275245e+01  | 8.477347e+00 |
| Au | -5.876302e+00 | 1.020602e+01  | 8.478409e+00 |
| Au | 1.033231e+01  | 7.649534e+00  | 8.484905e+00 |
| Au | 8.875574e+00  | 5.097669e+00  | 8.492225e+00 |
| Au | 8.876629e+00  | 1.020259e+01  | 8.494534e+00 |
| Au | 7.407048e+00  | 7.653790e+00  | 8.496273e+00 |
| O  | 4.293955e+00  | 1.068590e+01  | 1.021992e+01 |
| O  | 4.256656e+00  | 4.516969e+00  | 1.024511e+01 |
| S  | 4.292119e+00  | 9.907175e+00  | 1.153002e+01 |
| O  | 5.570771e+00  | 6.216371e+00  | 1.153749e+01 |
| S  | 4.270227e+00  | 5.306393e+00  | 1.154648e+01 |
| O  | 5.602294e+00  | 9.011735e+00  | 1.155309e+01 |
| O  | 3.041476e+00  | 8.985111e+00  | 1.161479e+01 |
| O  | 3.011807e+00  | 6.216388e+00  | 1.164631e+01 |
| O  | 7.664165e+00  | 7.541990e+00  | 1.240832e+01 |
| O  | 4.366788e+00  | 1.097115e+01  | 1.263041e+01 |
| O  | 4.380687e+00  | 4.256912e+00  | 1.265778e+01 |
| O  | 9.831676e-01  | 7.637745e+00  | 1.274199e+01 |
| O  | 1.013426e+01  | 7.584445e+00  | 1.276731e+01 |
| K  | 7.358786e+00  | 1.070044e+01  | 1.280332e+01 |
| K  | 7.346327e+00  | 4.551342e+00  | 1.282144e+01 |
| Pt | 5.588738e+00  | 7.606862e+00  | 1.307375e+01 |
| Pt | 3.036940e+00  | 7.619368e+00  | 1.318002e+01 |
| O  | -1.445271e+00 | 7.649729e+00  | 1.324886e+01 |
| S  | 8.827857e+00  | 7.583654e+00  | 1.345215e+01 |
| S  | -1.038144e-01 | 7.643001e+00  | 1.386265e+01 |
| O  | 8.655714e+00  | 8.892109e+00  | 1.433068e+01 |
| O  | 5.872221e+00  | 9.116385e+00  | 1.437493e+01 |
| O  | 5.863990e+00  | 6.108519e+00  | 1.438753e+01 |
| O  | 8.687503e+00  | 6.312506e+00  | 1.438775e+01 |
| O  | 2.839537e+00  | 9.116573e+00  | 1.450001e+01 |
| O  | 2.832719e+00  | 6.139843e+00  | 1.451753e+01 |
| O  | 5.703455e+00  | 1.194944e+01  | 1.456905e+01 |
| O  | 5.679637e+00  | 3.287656e+00  | 1.460523e+01 |
| Pt | 4.357713e+00  | 1.041384e+01  | 1.468850e+01 |
| Pt | 4.339202e+00  | 4.828507e+00  | 1.471208e+01 |
| O  | 2.966744e+00  | 1.188827e+01  | 1.474397e+01 |
| O  | 6.413634e-02  | 8.928652e+00  | 1.477674e+01 |
| O  | 5.779686e-02  | 6.356681e+00  | 1.477690e+01 |
| O  | 2.928101e+00  | 3.372412e+00  | 1.477976e+01 |
| O  | 7.779863e+00  | 1.094377e+01  | 1.560156e+01 |
| O  | 7.752490e+00  | 4.282561e+00  | 1.564769e+01 |

|    |               |              |              |
|----|---------------|--------------|--------------|
| O  | 7.370648e+00  | 1.340517e+01 | 1.573213e+01 |
| S  | 6.730252e+00  | 1.207840e+01 | 1.578476e+01 |
| O  | 7.320023e+00  | 1.826176e+00 | 1.580233e+01 |
| S  | 6.691613e+00  | 3.159119e+00 | 1.583311e+01 |
| Pt | 7.253730e+00  | 8.878081e+00 | 1.583693e+01 |
| Pt | 7.244734e+00  | 6.351819e+00 | 1.585453e+01 |
| Pt | 1.610642e+00  | 8.905786e+00 | 1.606547e+01 |
| Pt | 1.596368e+00  | 6.378998e+00 | 1.607502e+01 |
| S  | 2.167438e+00  | 1.210258e+01 | 1.608605e+01 |
| S  | 2.120556e+00  | 3.179686e+00 | 1.612163e+01 |
| O  | 1.540796e+00  | 1.343597e+01 | 1.612615e+01 |
| O  | 1.479161e+00  | 1.853155e+00 | 1.617028e+01 |
| O  | 1.106762e+00  | 1.098038e+01 | 1.628240e+01 |
| O  | 1.070881e+00  | 4.316033e+00 | 1.630184e+01 |
| O  | 8.801746e+00  | 8.901399e+00 | 1.712406e+01 |
| O  | 5.928602e+00  | 1.188572e+01 | 1.712875e+01 |
| O  | 8.778924e+00  | 6.330215e+00 | 1.715910e+01 |
| O  | 5.880373e+00  | 3.373566e+00 | 1.716811e+01 |
| Pt | 4.522398e+00  | 1.042650e+01 | 1.719939e+01 |
| Pt | 4.485682e+00  | 4.842188e+00 | 1.722277e+01 |
| O  | 3.194208e+00  | 1.197661e+01 | 1.730147e+01 |
| O  | 3.138132e+00  | 3.308461e+00 | 1.734475e+01 |
| O  | 6.029085e+00  | 9.119491e+00 | 1.740272e+01 |
| O  | 6.000786e+00  | 6.145575e+00 | 1.740835e+01 |
| O  | 2.995976e+00  | 9.145079e+00 | 1.752398e+01 |
| O  | 2.974378e+00  | 6.137345e+00 | 1.754374e+01 |
| O  | 1.583439e-01  | 6.369864e+00 | 1.754759e+01 |
| O  | 2.032953e-01  | 8.947365e+00 | 1.756674e+01 |
| S  | 8.956330e+00  | 7.626779e+00 | 1.805555e+01 |
| S  | 2.748090e-02  | 7.653947e+00 | 1.846666e+01 |
| O  | 1.029671e+01  | 7.624205e+00 | 1.867211e+01 |
| Pt | 5.817422e+00  | 7.637679e+00 | 1.873718e+01 |
| Pt | 3.267045e+00  | 7.647125e+00 | 1.884204e+01 |
| K  | 1.527083e+00  | 1.075874e+01 | 1.907331e+01 |
| K  | 1.479700e+00  | 4.608121e+00 | 1.912505e+01 |
| O  | -1.275914e+00 | 7.668208e+00 | 1.915699e+01 |
| O  | 7.869126e+00  | 7.649572e+00 | 1.917557e+01 |
| O  | 4.512691e+00  | 1.100726e+01 | 1.925218e+01 |
| O  | 4.436773e+00  | 4.287896e+00 | 1.928053e+01 |
| O  | 1.193672e+00  | 7.622892e+00 | 1.950861e+01 |
| O  | 5.837545e+00  | 6.238751e+00 | 2.027558e+01 |
| O  | 5.821079e+00  | 9.020856e+00 | 2.029557e+01 |
| O  | 3.260852e+00  | 9.068743e+00 | 2.034658e+01 |
| S  | 4.577488e+00  | 9.955152e+00 | 2.036538e+01 |
| S  | 4.568911e+00  | 5.344730e+00 | 2.038302e+01 |
| O  | 3.279028e+00  | 6.269291e+00 | 2.039433e+01 |
| O  | 4.569600e+00  | 1.075001e+01 | 2.166516e+01 |
| O  | 4.587278e+00  | 4.555773e+00 | 2.168817e+01 |
| Au | 7.737670e+00  | 7.692594e+00 | 2.343701e+01 |
| Au | 9.207250e+00  | 1.024140e+01 | 2.343875e+01 |
| Au | 9.206196e+00  | 5.136473e+00 | 2.344106e+01 |
| Au | 1.066293e+01  | 7.688339e+00 | 2.344838e+01 |
| Au | -5.545680e+00 | 1.024483e+01 | 2.345487e+01 |
| Au | -7.021372e+00 | 1.279126e+01 | 2.345594e+01 |
| Au | -4.080757e+00 | 1.279908e+01 | 2.346108e+01 |
| Au | 7.714700e+00  | 2.588758e+00 | 2.346333e+01 |
| Au | 7.711455e+00  | 1.279864e+01 | 2.346632e+01 |
| Au | -4.084192e+00 | 7.690796e+00 | 2.346816e+01 |
| Au | 1.212314e+01  | 5.132533e+00 | 2.347067e+01 |
| Au | 6.238796e+00  | 3.410715e-02 | 2.347113e+01 |
| Au | -2.624452e+00 | 1.024592e+01 | 2.347193e+01 |
| Au | 3.270575e+00  | 3.751704e-02 | 2.347584e+01 |

|    |               |              |              |
|----|---------------|--------------|--------------|
| Au | 1.064887e+01  | 2.583321e+00 | 2.347615e+01 |
| Au | 9.172685e+00  | 4.175465e-02 | 2.347922e+01 |
| Au | -1.141613e+00 | 1.279349e+01 | 2.347962e+01 |
| Au | -1.166128e+00 | 7.691272e+00 | 2.348182e+01 |
| Au | 3.306214e-01  | 3.880450e-02 | 2.348398e+01 |
| Au | -2.628425e+00 | 5.133171e+00 | 2.348750e+01 |
| Au | 1.358777e+01  | 2.583228e+00 | 2.349196e+01 |
| Au | 2.850647e-01  | 1.024065e+01 | 2.349360e+01 |
| Au | 1.211453e+01  | 4.081815e-02 | 2.349611e+01 |
| Au | 1.506433e+01  | 4.083409e-02 | 2.349662e+01 |
| Au | -1.146983e+00 | 2.584879e+00 | 2.350377e+01 |
| Au | 4.750599e+00  | 7.692450e+00 | 2.350677e+01 |
| Au | 1.793319e+00  | 1.280701e+01 | 2.350754e+01 |
| Au | 2.775036e-01  | 5.140657e+00 | 2.350791e+01 |
| Au | 1.789642e+00  | 2.584421e+00 | 2.351064e+01 |
| Au | 1.752673e+00  | 7.691834e+00 | 2.351151e+01 |
| Au | 4.761232e+00  | 2.560311e+00 | 2.351572e+01 |
| Au | 6.292286e+00  | 5.154091e+00 | 2.352233e+01 |
| Au | 4.760925e+00  | 1.281219e+01 | 2.353175e+01 |
| Au | 6.298561e+00  | 1.022875e+01 | 2.354234e+01 |
| Au | 3.175354e+00  | 5.171404e+00 | 2.359670e+01 |
| Au | 3.167141e+00  | 1.021945e+01 | 2.361277e+01 |
| Au | 3.306214e-01  | 1.739140e+00 | 2.588861e+01 |
| Au | 3.275689e+00  | 1.739140e+00 | 2.588861e+01 |
| Au | 6.220757e+00  | 1.739140e+00 | 2.588861e+01 |
| Au | 9.165825e+00  | 1.739140e+00 | 2.588861e+01 |
| Au | 1.211089e+01  | 1.739140e+00 | 2.588861e+01 |
| Au | 1.505596e+01  | 1.739140e+00 | 2.588861e+01 |
| Au | -1.141913e+00 | 4.289644e+00 | 2.588861e+01 |
| Au | 1.803155e+00  | 4.289644e+00 | 2.588861e+01 |
| Au | 4.748223e+00  | 4.289644e+00 | 2.588861e+01 |
| Au | 7.693291e+00  | 4.289644e+00 | 2.588861e+01 |
| Au | 1.063836e+01  | 4.289644e+00 | 2.588861e+01 |
| Au | 1.358343e+01  | 4.289644e+00 | 2.588861e+01 |
| Au | -2.614447e+00 | 6.840148e+00 | 2.588861e+01 |
| Au | 3.306214e-01  | 6.840148e+00 | 2.588861e+01 |
| Au | 3.275689e+00  | 6.840148e+00 | 2.588861e+01 |
| Au | 6.220757e+00  | 6.840148e+00 | 2.588861e+01 |
| Au | 9.165825e+00  | 6.840148e+00 | 2.588861e+01 |
| Au | 1.211089e+01  | 6.840148e+00 | 2.588861e+01 |
| Au | -4.086981e+00 | 9.390651e+00 | 2.588861e+01 |
| Au | -1.141913e+00 | 9.390651e+00 | 2.588861e+01 |
| Au | 1.803155e+00  | 9.390651e+00 | 2.588861e+01 |
| Au | 4.748223e+00  | 9.390651e+00 | 2.588861e+01 |
| Au | 7.693291e+00  | 9.390651e+00 | 2.588861e+01 |
| Au | 1.063836e+01  | 9.390651e+00 | 2.588861e+01 |
| Au | -5.559515e+00 | 1.194116e+01 | 2.588861e+01 |
| Au | -2.614447e+00 | 1.194116e+01 | 2.588861e+01 |
| Au | 3.306214e-01  | 1.194116e+01 | 2.588861e+01 |
| Au | 3.275689e+00  | 1.194116e+01 | 2.588861e+01 |
| Au | 6.220757e+00  | 1.194116e+01 | 2.588861e+01 |
| Au | 9.165825e+00  | 1.194116e+01 | 2.588861e+01 |
| Au | -7.032049e+00 | 1.449166e+01 | 2.588861e+01 |
| Au | -4.086981e+00 | 1.449166e+01 | 2.588861e+01 |
| Au | -1.141913e+00 | 1.449166e+01 | 2.588861e+01 |
| Au | 1.803155e+00  | 1.449166e+01 | 2.588861e+01 |
| Au | 4.748223e+00  | 1.449166e+01 | 2.588861e+01 |
| Au | 7.693291e+00  | 1.449166e+01 | 2.588861e+01 |
| Au | 1.803155e+00  | 8.889724e-01 | 2.829325e+01 |
| Au | 4.748223e+00  | 8.889724e-01 | 2.829325e+01 |
| Au | 7.693291e+00  | 8.889724e-01 | 2.829325e+01 |
| Au | 1.063836e+01  | 8.889724e-01 | 2.829325e+01 |

|    |               |              |              |
|----|---------------|--------------|--------------|
| Au | 1.358343e+01  | 8.889724e-01 | 2.829325e+01 |
| Au | 1.652850e+01  | 8.889724e-01 | 2.829325e+01 |
| Au | 3.306214e-01  | 3.439476e+00 | 2.829325e+01 |
| Au | 3.275689e+00  | 3.439476e+00 | 2.829325e+01 |
| Au | 6.220757e+00  | 3.439476e+00 | 2.829325e+01 |
| Au | 9.165825e+00  | 3.439476e+00 | 2.829325e+01 |
| Au | 1.211089e+01  | 3.439476e+00 | 2.829325e+01 |
| Au | 1.505596e+01  | 3.439476e+00 | 2.829325e+01 |
| Au | -1.141913e+00 | 5.989980e+00 | 2.829325e+01 |
| Au | 1.803155e+00  | 5.989980e+00 | 2.829325e+01 |
| Au | 4.748223e+00  | 5.989980e+00 | 2.829325e+01 |
| Au | 7.693291e+00  | 5.989980e+00 | 2.829325e+01 |
| Au | 1.063836e+01  | 5.989980e+00 | 2.829325e+01 |
| Au | 1.358343e+01  | 5.989980e+00 | 2.829325e+01 |
| Au | -2.614447e+00 | 8.540483e+00 | 2.829325e+01 |
| Au | 3.306214e-01  | 8.540483e+00 | 2.829325e+01 |
| Au | 3.275689e+00  | 8.540483e+00 | 2.829325e+01 |
| Au | 6.220757e+00  | 8.540483e+00 | 2.829325e+01 |
| Au | 9.165825e+00  | 8.540483e+00 | 2.829325e+01 |
| Au | 1.211089e+01  | 8.540483e+00 | 2.829325e+01 |
| Au | -4.086981e+00 | 1.109099e+01 | 2.829325e+01 |
| Au | -1.141913e+00 | 1.109099e+01 | 2.829325e+01 |
| Au | 1.803155e+00  | 1.109099e+01 | 2.829325e+01 |
| Au | 4.748223e+00  | 1.109099e+01 | 2.829325e+01 |
| Au | 7.693291e+00  | 1.109099e+01 | 2.829325e+01 |
| Au | 1.063836e+01  | 1.109099e+01 | 2.829325e+01 |
| Au | -5.559515e+00 | 1.364149e+01 | 2.829325e+01 |
| Au | -2.614447e+00 | 1.364149e+01 | 2.829325e+01 |
| Au | 3.306214e-01  | 1.364149e+01 | 2.829325e+01 |
| Au | 3.275689e+00  | 1.364149e+01 | 2.829325e+01 |
| Au | 6.220757e+00  | 1.364149e+01 | 2.829325e+01 |
| Au | 9.165825e+00  | 1.364149e+01 | 2.829325e+01 |
| Au | 3.306214e-01  | 3.880450e-02 | 3.069789e+01 |
| Au | 3.275689e+00  | 3.880450e-02 | 3.069789e+01 |
| Au | 6.220757e+00  | 3.880450e-02 | 3.069789e+01 |
| Au | 9.165825e+00  | 3.880450e-02 | 3.069789e+01 |
| Au | 1.211089e+01  | 3.880450e-02 | 3.069789e+01 |
| Au | 1.505596e+01  | 3.880450e-02 | 3.069789e+01 |
| Au | -1.141913e+00 | 2.589308e+00 | 3.069789e+01 |
| Au | 1.803155e+00  | 2.589308e+00 | 3.069789e+01 |
| Au | 4.748223e+00  | 2.589308e+00 | 3.069789e+01 |
| Au | 7.693291e+00  | 2.589308e+00 | 3.069789e+01 |
| Au | 1.063836e+01  | 2.589308e+00 | 3.069789e+01 |
| Au | 1.358343e+01  | 2.589308e+00 | 3.069789e+01 |
| Au | -2.614447e+00 | 5.139812e+00 | 3.069789e+01 |
| Au | 3.306214e-01  | 5.139812e+00 | 3.069789e+01 |
| Au | 3.275689e+00  | 5.139812e+00 | 3.069789e+01 |
| Au | 6.220757e+00  | 5.139812e+00 | 3.069789e+01 |
| Au | 9.165825e+00  | 5.139812e+00 | 3.069789e+01 |
| Au | 1.211089e+01  | 5.139812e+00 | 3.069789e+01 |
| Au | -4.086981e+00 | 7.690316e+00 | 3.069789e+01 |
| Au | -1.141913e+00 | 7.690316e+00 | 3.069789e+01 |
| Au | 1.803155e+00  | 7.690316e+00 | 3.069789e+01 |
| Au | 4.748223e+00  | 7.690316e+00 | 3.069789e+01 |
| Au | 7.693291e+00  | 7.690316e+00 | 3.069789e+01 |
| Au | 1.063836e+01  | 7.690316e+00 | 3.069789e+01 |
| Au | -5.559515e+00 | 1.024082e+01 | 3.069789e+01 |
| Au | -2.614447e+00 | 1.024082e+01 | 3.069789e+01 |
| Au | 3.306214e-01  | 1.024082e+01 | 3.069789e+01 |
| Au | 3.275689e+00  | 1.024082e+01 | 3.069789e+01 |
| Au | 6.220757e+00  | 1.024082e+01 | 3.069789e+01 |
| Au | 9.165825e+00  | 1.024082e+01 | 3.069789e+01 |



|    |               |              |              |
|----|---------------|--------------|--------------|
| Au | -7.032049e+00 | 1.279132e+01 | 3.069789e+01 |
| Au | -4.086981e+00 | 1.279132e+01 | 3.069789e+01 |
| Au | -1.141913e+00 | 1.279132e+01 | 3.069789e+01 |
| Au | 1.803155e+00  | 1.279132e+01 | 3.069789e+01 |
| Au | 4.748223e+00  | 1.279132e+01 | 3.069789e+01 |
| Au | 7.693291e+00  | 1.279132e+01 | 3.069789e+01 |

Cartesian coordinates (in Angstroms) of the Au/POM/Au junction with  $\{K_8[Pt_{12}O_8(SO_4)_{12}]\}$ .

376

xyz

|    |               |              |              |
|----|---------------|--------------|--------------|
| Au | 0.000000e+00  | 0.000000e+00 | 1.453735e+00 |
| Au | 2.945068e+00  | 0.000000e+00 | 1.453735e+00 |
| Au | 5.890136e+00  | 0.000000e+00 | 1.453735e+00 |
| Au | 8.835204e+00  | 0.000000e+00 | 1.453735e+00 |
| Au | 1.178027e+01  | 0.000000e+00 | 1.453735e+00 |
| Au | 1.472534e+01  | 0.000000e+00 | 1.453735e+00 |
| Au | -1.472534e+00 | 2.550504e+00 | 1.453735e+00 |
| Au | 1.472534e+00  | 2.550504e+00 | 1.453735e+00 |
| Au | 4.417602e+00  | 2.550504e+00 | 1.453735e+00 |
| Au | 7.362670e+00  | 2.550504e+00 | 1.453735e+00 |
| Au | 1.030774e+01  | 2.550504e+00 | 1.453735e+00 |
| Au | 1.325281e+01  | 2.550504e+00 | 1.453735e+00 |
| Au | -2.945068e+00 | 5.101007e+00 | 1.453735e+00 |
| Au | -9.000000e-12 | 5.101007e+00 | 1.453735e+00 |
| Au | 2.945068e+00  | 5.101007e+00 | 1.453735e+00 |
| Au | 5.890136e+00  | 5.101007e+00 | 1.453735e+00 |
| Au | 8.835204e+00  | 5.101007e+00 | 1.453735e+00 |
| Au | 1.178027e+01  | 5.101007e+00 | 1.453735e+00 |
| Au | -4.417602e+00 | 7.651511e+00 | 1.453735e+00 |
| Au | -1.472534e+00 | 7.651511e+00 | 1.453735e+00 |
| Au | 1.472534e+00  | 7.651511e+00 | 1.453735e+00 |
| Au | 4.417602e+00  | 7.651511e+00 | 1.453735e+00 |
| Au | 7.362670e+00  | 7.651511e+00 | 1.453735e+00 |
| Au | 1.030774e+01  | 7.651511e+00 | 1.453735e+00 |
| Au | -5.890136e+00 | 1.020201e+01 | 1.453735e+00 |
| Au | -2.945068e+00 | 1.020201e+01 | 1.453735e+00 |
| Au | -0.000000e+00 | 1.020201e+01 | 1.453735e+00 |
| Au | 2.945068e+00  | 1.020201e+01 | 1.453735e+00 |
| Au | 5.890136e+00  | 1.020201e+01 | 1.453735e+00 |
| Au | 8.835204e+00  | 1.020201e+01 | 1.453735e+00 |
| Au | -7.362670e+00 | 1.275252e+01 | 1.453735e+00 |
| Au | -4.417602e+00 | 1.275252e+01 | 1.453735e+00 |
| Au | -1.472534e+00 | 1.275252e+01 | 1.453735e+00 |
| Au | 1.472534e+00  | 1.275252e+01 | 1.453735e+00 |
| Au | 4.417602e+00  | 1.275252e+01 | 1.453735e+00 |
| Au | 7.362670e+00  | 1.275252e+01 | 1.453735e+00 |
| Au | 1.472534e+00  | 8.501679e-01 | 3.858373e+00 |
| Au | 4.417602e+00  | 8.501679e-01 | 3.858373e+00 |
| Au | 7.362670e+00  | 8.501679e-01 | 3.858373e+00 |
| Au | 1.030774e+01  | 8.501679e-01 | 3.858373e+00 |
| Au | 1.325281e+01  | 8.501679e-01 | 3.858373e+00 |
| Au | 1.619787e+01  | 8.501679e-01 | 3.858373e+00 |
| Au | 9.000000e-12  | 3.400672e+00 | 3.858373e+00 |
| Au | 2.945068e+00  | 3.400672e+00 | 3.858373e+00 |
| Au | 5.890136e+00  | 3.400672e+00 | 3.858373e+00 |
| Au | 8.835204e+00  | 3.400672e+00 | 3.858373e+00 |
| Au | 1.178027e+01  | 3.400672e+00 | 3.858373e+00 |
| Au | 1.472534e+01  | 3.400672e+00 | 3.858373e+00 |
| Au | -1.472534e+00 | 5.951175e+00 | 3.858373e+00 |
| Au | 1.472534e+00  | 5.951175e+00 | 3.858373e+00 |

|    |               |              |              |
|----|---------------|--------------|--------------|
| Au | 4.417602e+00  | 5.951175e+00 | 3.858373e+00 |
| Au | 7.362670e+00  | 5.951175e+00 | 3.858373e+00 |
| Au | 1.030774e+01  | 5.951175e+00 | 3.858373e+00 |
| Au | 1.325281e+01  | 5.951175e+00 | 3.858373e+00 |
| Au | -2.945068e+00 | 8.501679e+00 | 3.858373e+00 |
| Au | 0.000000e+00  | 8.501679e+00 | 3.858373e+00 |
| Au | 2.945068e+00  | 8.501679e+00 | 3.858373e+00 |
| Au | 5.890136e+00  | 8.501679e+00 | 3.858373e+00 |
| Au | 8.835204e+00  | 8.501679e+00 | 3.858373e+00 |
| Au | 1.178027e+01  | 8.501679e+00 | 3.858373e+00 |
| Au | -4.417602e+00 | 1.105218e+01 | 3.858373e+00 |
| Au | -1.472534e+00 | 1.105218e+01 | 3.858373e+00 |
| Au | 1.472534e+00  | 1.105218e+01 | 3.858373e+00 |
| Au | 4.417602e+00  | 1.105218e+01 | 3.858373e+00 |
| Au | 7.362670e+00  | 1.105218e+01 | 3.858373e+00 |
| Au | 1.030774e+01  | 1.105218e+01 | 3.858373e+00 |
| Au | -5.890136e+00 | 1.360269e+01 | 3.858373e+00 |
| Au | -2.945068e+00 | 1.360269e+01 | 3.858373e+00 |
| Au | -9.000000e-12 | 1.360269e+01 | 3.858373e+00 |
| Au | 2.945068e+00  | 1.360269e+01 | 3.858373e+00 |
| Au | 5.890136e+00  | 1.360269e+01 | 3.858373e+00 |
| Au | 8.835204e+00  | 1.360269e+01 | 3.858373e+00 |
| Au | 0.000000e+00  | 1.700336e+00 | 6.263011e+00 |
| Au | 2.945068e+00  | 1.700336e+00 | 6.263011e+00 |
| Au | 5.890136e+00  | 1.700336e+00 | 6.263011e+00 |
| Au | 8.835204e+00  | 1.700336e+00 | 6.263011e+00 |
| Au | 1.178027e+01  | 1.700336e+00 | 6.263011e+00 |
| Au | 1.472534e+01  | 1.700336e+00 | 6.263011e+00 |
| Au | -1.472534e+00 | 4.250839e+00 | 6.263011e+00 |
| Au | 1.472534e+00  | 4.250839e+00 | 6.263011e+00 |
| Au | 4.417602e+00  | 4.250839e+00 | 6.263011e+00 |
| Au | 7.362670e+00  | 4.250839e+00 | 6.263011e+00 |
| Au | 1.030774e+01  | 4.250839e+00 | 6.263011e+00 |
| Au | 1.325281e+01  | 4.250839e+00 | 6.263011e+00 |
| Au | -2.945068e+00 | 6.801343e+00 | 6.263011e+00 |
| Au | 0.000000e+00  | 6.801343e+00 | 6.263011e+00 |
| Au | 2.945068e+00  | 6.801343e+00 | 6.263011e+00 |
| Au | 5.890136e+00  | 6.801343e+00 | 6.263011e+00 |
| Au | 8.835204e+00  | 6.801343e+00 | 6.263011e+00 |
| Au | 1.178027e+01  | 6.801343e+00 | 6.263011e+00 |
| Au | -4.417602e+00 | 9.351847e+00 | 6.263011e+00 |
| Au | -1.472534e+00 | 9.351847e+00 | 6.263011e+00 |
| Au | 1.472534e+00  | 9.351847e+00 | 6.263011e+00 |
| Au | 4.417602e+00  | 9.351847e+00 | 6.263011e+00 |
| Au | 7.362670e+00  | 9.351847e+00 | 6.263011e+00 |
| Au | 1.030774e+01  | 9.351847e+00 | 6.263011e+00 |
| Au | -5.890136e+00 | 1.190235e+01 | 6.263011e+00 |
| Au | -2.945068e+00 | 1.190235e+01 | 6.263011e+00 |
| Au | 9.000000e-12  | 1.190235e+01 | 6.263011e+00 |
| Au | 2.945068e+00  | 1.190235e+01 | 6.263011e+00 |
| Au | 5.890136e+00  | 1.190235e+01 | 6.263011e+00 |
| Au | 8.835204e+00  | 1.190235e+01 | 6.263011e+00 |
| Au | -7.362670e+00 | 1.445285e+01 | 6.263011e+00 |
| Au | -4.417602e+00 | 1.445285e+01 | 6.263011e+00 |
| Au | -1.472534e+00 | 1.445285e+01 | 6.263011e+00 |
| Au | 1.472534e+00  | 1.445285e+01 | 6.263011e+00 |
| Au | 4.417602e+00  | 1.445285e+01 | 6.263011e+00 |
| Au | 7.362670e+00  | 1.445285e+01 | 6.263011e+00 |
| Au | 6.061381e+00  | 1.014458e+01 | 8.435321e+00 |
| Au | 6.046016e+00  | 5.152840e+00 | 8.474391e+00 |
| Au | 4.424274e+00  | 1.279969e+01 | 8.544150e+00 |
| Au | 4.413348e+00  | 2.469931e+00 | 8.567970e+00 |

|    |               |               |              |
|----|---------------|---------------|--------------|
| Au | 2.874893e+00  | 1.018339e+01  | 8.573864e+00 |
| Au | 2.874895e+00  | 5.110964e+00  | 8.595979e+00 |
| Au | 7.398119e+00  | 1.275307e+01  | 8.619450e+00 |
| Au | 7.456885e+00  | 7.646547e+00  | 8.628551e+00 |
| Au | 7.395082e+00  | 2.535282e+00  | 8.630355e+00 |
| Au | 4.428257e+00  | 7.650920e+00  | 8.636358e+00 |
| Au | 1.473760e+01  | 8.504808e-03  | 8.636920e+00 |
| Au | 1.178220e+01  | 8.388511e-03  | 8.643436e+00 |
| Au | 8.915903e+00  | 5.087583e+00  | 8.653028e+00 |
| Au | 8.845343e+00  | -1.223095e-02 | 8.655188e+00 |
| Au | 1.326598e+01  | 2.544908e+00  | 8.655226e+00 |
| Au | 1.036048e+01  | 7.635831e+00  | 8.656320e+00 |
| Au | 1.032754e+01  | 2.539577e+00  | 8.656886e+00 |
| Au | 5.910191e+00  | -3.093628e-02 | 8.659130e+00 |
| Au | 8.923186e+00  | 1.018883e+01  | 8.659206e+00 |
| Au | 2.930675e+00  | -3.359885e-02 | 8.660110e+00 |
| Au | 1.181375e+01  | 5.085356e+00  | 8.664448e+00 |
| Au | 0.000000e+00  | 0.000000e+00  | 8.667649e+00 |
| Au | -5.857548e+00 | 1.019327e+01  | 8.669458e+00 |
| Au | -7.347709e+00 | 1.273674e+01  | 8.672075e+00 |
| Au | 1.464042e+00  | 1.274784e+01  | 8.673470e+00 |
| Au | -4.396835e+00 | 7.643348e+00  | 8.678622e+00 |
| Au | -4.406358e+00 | 1.274234e+01  | 8.681769e+00 |
| Au | -2.938271e+00 | 5.091074e+00  | 8.684454e+00 |
| Au | -1.472768e+00 | 2.545343e+00  | 8.685515e+00 |
| Au | -1.464838e+00 | 1.273812e+01  | 8.695538e+00 |
| Au | 1.455116e+00  | 2.543837e+00  | 8.696697e+00 |
| Au | -2.938494e+00 | 1.019827e+01  | 8.697064e+00 |
| Au | 1.436330e+00  | 7.645044e+00  | 8.712599e+00 |
| Au | -2.930885e-02 | 5.088477e+00  | 8.724946e+00 |
| Au | -1.479428e+00 | 7.641917e+00  | 8.729052e+00 |
| Au | -2.334753e-02 | 1.019493e+01  | 8.730375e+00 |
| O  | 4.703162e+00  | 1.082538e+01  | 1.027931e+01 |
| O  | 4.671065e+00  | 4.359900e+00  | 1.029404e+01 |
| O  | 3.420700e+00  | 8.923548e+00  | 1.138888e+01 |
| S  | 4.612175e+00  | 9.949000e+00  | 1.152393e+01 |
| S  | 4.645580e+00  | 5.217137e+00  | 1.155099e+01 |
| O  | 3.329286e+00  | 6.080798e+00  | 1.155130e+01 |
| O  | 5.889231e+00  | 6.173828e+00  | 1.160887e+01 |
| O  | 5.944791e+00  | 9.153586e+00  | 1.173576e+01 |
| O  | 1.211693e+00  | 7.634593e+00  | 1.233841e+01 |
| K  | 1.496577e+00  | 1.050022e+01  | 1.252792e+01 |
| O  | 4.324688e+00  | 1.095896e+01  | 1.264367e+01 |
| O  | -1.268744e+00 | 7.654037e+00  | 1.265449e+01 |
| O  | 4.676915e+00  | 4.186988e+00  | 1.268886e+01 |
| O  | 7.979795e+00  | 7.515841e+00  | 1.271664e+01 |
| K  | 1.417983e+00  | 4.570735e+00  | 1.273457e+01 |
| K  | 7.653480e+00  | 4.633919e+00  | 1.295686e+01 |
| Pt | 3.285910e+00  | 7.579009e+00  | 1.303272e+01 |
| K  | 7.763645e+00  | 1.058638e+01  | 1.308655e+01 |
| Pt | 5.842234e+00  | 7.595442e+00  | 1.318071e+01 |
| O  | 1.042385e+01  | 7.493697e+00  | 1.326768e+01 |
| S  | 2.561537e-02  | 7.638300e+00  | 1.336558e+01 |
| S  | 9.065684e+00  | 7.512641e+00  | 1.384396e+01 |
| O  | 1.568718e-01  | 6.345288e+00  | 1.427100e+01 |
| O  | 1.764304e-01  | 8.919783e+00  | 1.428682e+01 |
| O  | 2.960284e+00  | 9.080696e+00  | 1.434960e+01 |
| O  | 2.974409e+00  | 6.095186e+00  | 1.436939e+01 |
| O  | 6.019490e+00  | 9.082814e+00  | 1.452199e+01 |
| O  | 6.022691e+00  | 6.096389e+00  | 1.453501e+01 |
| O  | 3.078901e+00  | 3.301075e+00  | 1.459331e+01 |
| O  | 2.978773e+00  | 1.181945e+01  | 1.460041e+01 |

|    |               |              |              |
|----|---------------|--------------|--------------|
| O  | 5.875103e+00  | 1.186867e+01 | 1.468364e+01 |
| Pt | 4.458748e+00  | 1.037725e+01 | 1.468845e+01 |
| Pt | 4.493994e+00  | 4.797928e+00 | 1.471726e+01 |
| O  | 8.852701e+00  | 8.810527e+00 | 1.472829e+01 |
| O  | 8.828945e+00  | 6.236951e+00 | 1.475388e+01 |
| O  | 5.969607e+00  | 3.351660e+00 | 1.477011e+01 |
| O  | 9.737375e-01  | 4.259978e+00 | 1.563738e+01 |
| O  | 1.435081e+00  | 1.799938e+00 | 1.576288e+01 |
| S  | 2.050156e+00  | 3.140520e+00 | 1.578974e+01 |
| Pt | 1.565837e+00  | 6.334906e+00 | 1.579131e+01 |
| Pt | 1.581929e+00  | 8.865458e+00 | 1.580639e+01 |
| O  | 1.505745e+00  | 1.341124e+01 | 1.589727e+01 |
| S  | 2.105070e+00  | 1.206334e+01 | 1.590050e+01 |
| O  | 7.888173e+00  | 1.091891e+01 | 1.591285e+01 |
| O  | 7.421786e+00  | 1.338089e+01 | 1.595440e+01 |
| O  | 1.008907e+00  | 1.095644e+01 | 1.595479e+01 |
| S  | 6.805207e+00  | 1.204029e+01 | 1.596182e+01 |
| Pt | 7.291644e+00  | 8.835405e+00 | 1.607783e+01 |
| Pt | 7.276858e+00  | 6.303520e+00 | 1.611505e+01 |
| S  | 6.739147e+00  | 3.110972e+00 | 1.613629e+01 |
| O  | 7.335267e+00  | 1.762171e+00 | 1.617211e+01 |
| O  | 7.834333e+00  | 4.215694e+00 | 1.627116e+01 |
| O  | 1.824431e-02  | 8.865598e+00 | 1.715412e+01 |
| O  | 2.817542e+00  | 3.383306e+00 | 1.715767e+01 |
| O  | 2.652717e-02  | 6.292625e+00 | 1.717017e+01 |
| O  | 3.032936e+00  | 1.188978e+01 | 1.717965e+01 |
| Pt | 4.434448e+00  | 1.038644e+01 | 1.718856e+01 |
| Pt | 4.319588e+00  | 4.804294e+00 | 1.720805e+01 |
| O  | 5.931785e+00  | 1.181548e+01 | 1.726496e+01 |
| O  | 5.719550e+00  | 3.296083e+00 | 1.733766e+01 |
| O  | 2.863413e+00  | 9.102221e+00 | 1.735639e+01 |
| O  | 2.810661e+00  | 6.122190e+00 | 1.738087e+01 |
| O  | 5.863298e+00  | 6.084866e+00 | 1.753390e+01 |
| O  | 5.920223e+00  | 9.079373e+00 | 1.753843e+01 |
| O  | 8.698480e+00  | 8.883415e+00 | 1.759082e+01 |
| O  | 8.697585e+00  | 6.309076e+00 | 1.762893e+01 |
| S  | -1.985426e-01 | 7.584037e+00 | 1.805981e+01 |
| S  | 8.840785e+00  | 7.607276e+00 | 1.852328e+01 |
| O  | -1.553139e+00 | 7.586097e+00 | 1.864621e+01 |
| Pt | 3.024686e+00  | 7.629033e+00 | 1.871949e+01 |
| K  | 1.135449e+00  | 1.062792e+01 | 1.877932e+01 |
| Pt | 5.580402e+00  | 7.582832e+00 | 1.885587e+01 |
| K  | 1.190437e+00  | 4.706883e+00 | 1.901159e+01 |
| K  | 7.442341e+00  | 4.545479e+00 | 1.915312e+01 |
| O  | 8.896091e-01  | 7.597147e+00 | 1.918655e+01 |
| O  | 1.013762e+01  | 7.625806e+00 | 1.923003e+01 |
| O  | 4.579492e+00  | 1.098199e+01 | 1.923284e+01 |
| O  | 4.058184e+00  | 4.215687e+00 | 1.924195e+01 |
| K  | 7.402888e+00  | 1.049059e+01 | 1.934266e+01 |
| O  | 7.656685e+00  | 7.623086e+00 | 1.955120e+01 |
| O  | 2.940261e+00  | 9.194390e+00 | 2.014607e+01 |
| O  | 5.534129e+00  | 6.063890e+00 | 2.030584e+01 |
| O  | 2.981742e+00  | 6.254691e+00 | 2.034535e+01 |
| S  | 4.281516e+00  | 9.978917e+00 | 2.035561e+01 |
| S  | 4.187557e+00  | 5.250672e+00 | 2.036866e+01 |
| O  | 5.463107e+00  | 8.942738e+00 | 2.049071e+01 |
| O  | 4.173146e+00  | 1.085382e+01 | 2.159897e+01 |
| O  | 4.204418e+00  | 4.407723e+00 | 2.163925e+01 |
| Au | -4.899944e-01 | 1.024276e+01 | 2.320291e+01 |
| Au | -1.946074e+00 | 7.689739e+00 | 2.320423e+01 |
| Au | -4.959557e-01 | 5.136300e+00 | 2.320834e+01 |
| Au | 9.696828e-01  | 7.692867e+00 | 2.322068e+01 |

|    |               |              |              |
|----|---------------|--------------|--------------|
| Au | -3.405141e+00 | 1.024609e+01 | 2.323622e+01 |
| Au | 9.884689e-01  | 2.591659e+00 | 2.323659e+01 |
| Au | -1.931485e+00 | 1.278595e+01 | 2.323775e+01 |
| Au | -1.939414e+00 | 2.593166e+00 | 2.324777e+01 |
| Au | -3.404918e+00 | 5.138896e+00 | 2.324883e+01 |
| Au | -4.873005e+00 | 1.279017e+01 | 2.325151e+01 |
| Au | -4.863481e+00 | 7.691170e+00 | 2.325466e+01 |
| Au | 9.973950e-01  | 1.279566e+01 | 2.325981e+01 |
| Au | -7.814356e+00 | 1.278456e+01 | 2.326121e+01 |
| Au | -6.324194e+00 | 1.024110e+01 | 2.326383e+01 |
| Au | -4.666468e-01 | 4.782247e-02 | 2.326564e+01 |
| Au | 1.134710e+01  | 5.133178e+00 | 2.326884e+01 |
| Au | 2.464028e+00  | 1.422362e-02 | 2.327317e+01 |
| Au | 8.456539e+00  | 1.023666e+01 | 2.327408e+01 |
| Au | 5.443544e+00  | 1.688619e-02 | 2.327415e+01 |
| Au | 9.860893e+00  | 2.587399e+00 | 2.327640e+01 |
| Au | 9.893831e+00  | 7.683653e+00 | 2.327696e+01 |
| Au | 1.279933e+01  | 2.592731e+00 | 2.327806e+01 |
| Au | 8.378696e+00  | 3.559152e-02 | 2.327810e+01 |
| Au | 8.449256e+00  | 5.135405e+00 | 2.328026e+01 |
| Au | 1.131555e+01  | 5.621098e-02 | 2.328985e+01 |
| Au | 1.427096e+01  | 5.632728e-02 | 2.329636e+01 |
| Au | 3.961610e+00  | 7.698743e+00 | 2.329693e+01 |
| Au | 6.928435e+00  | 2.583104e+00 | 2.330293e+01 |
| Au | 6.990238e+00  | 7.694369e+00 | 2.330473e+01 |
| Au | 6.931472e+00  | 1.280090e+01 | 2.331383e+01 |
| Au | 2.408248e+00  | 5.158786e+00 | 2.333731e+01 |
| Au | 2.408246e+00  | 1.023121e+01 | 2.335942e+01 |
| Au | 3.946701e+00  | 2.517754e+00 | 2.336531e+01 |
| Au | 3.957627e+00  | 1.284752e+01 | 2.338913e+01 |
| Au | 5.579369e+00  | 5.200662e+00 | 2.345889e+01 |
| Au | 5.594734e+00  | 1.019240e+01 | 2.349796e+01 |
| Au | -4.666468e-01 | 1.748158e+00 | 2.567027e+01 |
| Au | 2.478421e+00  | 1.748158e+00 | 2.567027e+01 |
| Au | 5.423489e+00  | 1.748158e+00 | 2.567027e+01 |
| Au | 8.368557e+00  | 1.748158e+00 | 2.567027e+01 |
| Au | 1.131363e+01  | 1.748158e+00 | 2.567027e+01 |
| Au | 1.425869e+01  | 1.748158e+00 | 2.567027e+01 |
| Au | -1.939181e+00 | 4.298662e+00 | 2.567027e+01 |
| Au | 1.005887e+00  | 4.298662e+00 | 2.567027e+01 |
| Au | 3.950955e+00  | 4.298662e+00 | 2.567027e+01 |
| Au | 6.896023e+00  | 4.298662e+00 | 2.567027e+01 |
| Au | 9.841091e+00  | 4.298662e+00 | 2.567027e+01 |
| Au | 1.278616e+01  | 4.298662e+00 | 2.567027e+01 |
| Au | -3.411715e+00 | 6.849166e+00 | 2.567027e+01 |
| Au | -4.666468e-01 | 6.849166e+00 | 2.567027e+01 |
| Au | 2.478421e+00  | 6.849166e+00 | 2.567027e+01 |
| Au | 5.423489e+00  | 6.849166e+00 | 2.567027e+01 |
| Au | 8.368557e+00  | 6.849166e+00 | 2.567027e+01 |
| Au | 1.131363e+01  | 6.849166e+00 | 2.567027e+01 |
| Au | -4.884249e+00 | 9.399669e+00 | 2.567027e+01 |
| Au | -1.939181e+00 | 9.399669e+00 | 2.567027e+01 |
| Au | 1.005887e+00  | 9.399669e+00 | 2.567027e+01 |
| Au | 3.950955e+00  | 9.399669e+00 | 2.567027e+01 |
| Au | 6.896023e+00  | 9.399669e+00 | 2.567027e+01 |
| Au | 9.841091e+00  | 9.399669e+00 | 2.567027e+01 |
| Au | -6.356783e+00 | 1.195017e+01 | 2.567027e+01 |
| Au | -3.411715e+00 | 1.195017e+01 | 2.567027e+01 |
| Au | -4.666468e-01 | 1.195017e+01 | 2.567027e+01 |
| Au | 2.478421e+00  | 1.195017e+01 | 2.567027e+01 |
| Au | 5.423489e+00  | 1.195017e+01 | 2.567027e+01 |
| Au | 8.368557e+00  | 1.195017e+01 | 2.567027e+01 |

|    |               |              |              |
|----|---------------|--------------|--------------|
| Au | -7.829317e+00 | 1.450068e+01 | 2.567027e+01 |
| Au | -4.884249e+00 | 1.450068e+01 | 2.567027e+01 |
| Au | -1.939181e+00 | 1.450068e+01 | 2.567027e+01 |
| Au | 1.005887e+00  | 1.450068e+01 | 2.567027e+01 |
| Au | 3.950955e+00  | 1.450068e+01 | 2.567027e+01 |
| Au | 6.896023e+00  | 1.450068e+01 | 2.567027e+01 |
| Au | 1.005887e+00  | 8.979904e-01 | 2.807491e+01 |
| Au | 3.950955e+00  | 8.979904e-01 | 2.807491e+01 |
| Au | 6.896023e+00  | 8.979904e-01 | 2.807491e+01 |
| Au | 9.841091e+00  | 8.979904e-01 | 2.807491e+01 |
| Au | 1.278616e+01  | 8.979904e-01 | 2.807491e+01 |
| Au | 1.573123e+01  | 8.979904e-01 | 2.807491e+01 |
| Au | -4.666468e-01 | 3.448494e+00 | 2.807491e+01 |
| Au | 2.478421e+00  | 3.448494e+00 | 2.807491e+01 |
| Au | 5.423489e+00  | 3.448494e+00 | 2.807491e+01 |
| Au | 8.368557e+00  | 3.448494e+00 | 2.807491e+01 |
| Au | 1.131363e+01  | 3.448494e+00 | 2.807491e+01 |
| Au | 1.425869e+01  | 3.448494e+00 | 2.807491e+01 |
| Au | -1.939181e+00 | 5.998998e+00 | 2.807491e+01 |
| Au | 1.005887e+00  | 5.998998e+00 | 2.807491e+01 |
| Au | 3.950955e+00  | 5.998998e+00 | 2.807491e+01 |
| Au | 6.896023e+00  | 5.998998e+00 | 2.807491e+01 |
| Au | 9.841091e+00  | 5.998998e+00 | 2.807491e+01 |
| Au | 1.278616e+01  | 5.998998e+00 | 2.807491e+01 |
| Au | -3.411715e+00 | 8.549501e+00 | 2.807491e+01 |
| Au | -4.666468e-01 | 8.549501e+00 | 2.807491e+01 |
| Au | 2.478421e+00  | 8.549501e+00 | 2.807491e+01 |
| Au | 5.423489e+00  | 8.549501e+00 | 2.807491e+01 |
| Au | 8.368557e+00  | 8.549501e+00 | 2.807491e+01 |
| Au | 1.131363e+01  | 8.549501e+00 | 2.807491e+01 |
| Au | -4.884249e+00 | 1.110001e+01 | 2.807491e+01 |
| Au | -1.939181e+00 | 1.110001e+01 | 2.807491e+01 |
| Au | 1.005887e+00  | 1.110001e+01 | 2.807491e+01 |
| Au | 3.950955e+00  | 1.110001e+01 | 2.807491e+01 |
| Au | 6.896023e+00  | 1.110001e+01 | 2.807491e+01 |
| Au | 9.841091e+00  | 1.110001e+01 | 2.807491e+01 |
| Au | -6.356783e+00 | 1.365051e+01 | 2.807491e+01 |
| Au | -3.411715e+00 | 1.365051e+01 | 2.807491e+01 |
| Au | -4.666468e-01 | 1.365051e+01 | 2.807491e+01 |
| Au | 2.478421e+00  | 1.365051e+01 | 2.807491e+01 |
| Au | 5.423489e+00  | 1.365051e+01 | 2.807491e+01 |
| Au | 8.368557e+00  | 1.365051e+01 | 2.807491e+01 |
| Au | -4.666468e-01 | 4.782247e-02 | 3.047955e+01 |
| Au | 2.478421e+00  | 4.782247e-02 | 3.047955e+01 |
| Au | 5.423489e+00  | 4.782247e-02 | 3.047955e+01 |
| Au | 8.368557e+00  | 4.782247e-02 | 3.047955e+01 |
| Au | 1.131363e+01  | 4.782247e-02 | 3.047955e+01 |
| Au | 1.425869e+01  | 4.782247e-02 | 3.047955e+01 |
| Au | -1.939181e+00 | 2.598326e+00 | 3.047955e+01 |
| Au | 1.005887e+00  | 2.598326e+00 | 3.047955e+01 |
| Au | 3.950955e+00  | 2.598326e+00 | 3.047955e+01 |
| Au | 6.896023e+00  | 2.598326e+00 | 3.047955e+01 |
| Au | 9.841091e+00  | 2.598326e+00 | 3.047955e+01 |
| Au | 1.278616e+01  | 2.598326e+00 | 3.047955e+01 |
| Au | -3.411715e+00 | 5.148830e+00 | 3.047955e+01 |
| Au | -4.666468e-01 | 5.148830e+00 | 3.047955e+01 |
| Au | 2.478421e+00  | 5.148830e+00 | 3.047955e+01 |
| Au | 5.423489e+00  | 5.148830e+00 | 3.047955e+01 |
| Au | 8.368557e+00  | 5.148830e+00 | 3.047955e+01 |
| Au | 1.131363e+01  | 5.148830e+00 | 3.047955e+01 |
| Au | -4.884249e+00 | 7.699334e+00 | 3.047955e+01 |
| Au | -1.939181e+00 | 7.699334e+00 | 3.047955e+01 |

|    |               |              |              |
|----|---------------|--------------|--------------|
| Au | 1.005887e+00  | 7.699334e+00 | 3.047955e+01 |
| Au | 3.950955e+00  | 7.699334e+00 | 3.047955e+01 |
| Au | 6.896023e+00  | 7.699334e+00 | 3.047955e+01 |
| Au | 9.841091e+00  | 7.699334e+00 | 3.047955e+01 |
| Au | -6.356783e+00 | 1.024984e+01 | 3.047955e+01 |
| Au | -3.411715e+00 | 1.024984e+01 | 3.047955e+01 |
| Au | -4.666468e-01 | 1.024984e+01 | 3.047955e+01 |
| Au | 2.478421e+00  | 1.024984e+01 | 3.047955e+01 |
| Au | 5.423489e+00  | 1.024984e+01 | 3.047955e+01 |
| Au | 8.368557e+00  | 1.024984e+01 | 3.047955e+01 |
| Au | -7.829317e+00 | 1.280034e+01 | 3.047955e+01 |
| Au | -4.884249e+00 | 1.280034e+01 | 3.047955e+01 |
| Au | -1.939181e+00 | 1.280034e+01 | 3.047955e+01 |
| Au | 1.005887e+00  | 1.280034e+01 | 3.047955e+01 |
| Au | 3.950955e+00  | 1.280034e+01 | 3.047955e+01 |
| Au | 6.896023e+00  | 1.280034e+01 | 3.047955e+01 |

### References:

- 1 C. Simms, A. Kondinski and T. N. Parac-Vogt, *Eur. J. Inorg. Chem.*, 2020, 2559–2572.
- 2 A. Kondinski, *Chem. Model.*, 2021, **16**, 39–71.
- 3 A. Kondinski, *Nanoscale*, 2021, DOI:10.1039/D1NR02357H.
- 4 V. Stavila, A. A. Talin and M. D. Allendorf, *Chem. Soc. Rev.*, 2014, **43**, 5994–6010.
- 5 M. Wang, R. Dong and X. Feng, *Chem. Soc. Rev.*, 2021, **50**, 2764–2793.
- 6 J. Waser and E. D. McClanahan, *J. Chem. Phys.*, 1951, **19**, 413–416.
- 7 M. Pley and M. S. Wickleder, *Angew. Chemie Int. Ed.*, 2004, **43**, 4168–4170.
